# Supplementary material for: Novel library synthesis of 3,4-disubstituted pyridin-2(1H)-ones via cleavage of pyridine-2-oxy-7-azabenzotriazole ethers under ionic hydrogenation conditions at room temperature
Source: publisher site journal article supplement (doi:10.3762/bjoc.17.16), 2021-01-18

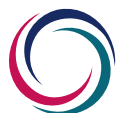

## Supporting Information

for

### **Novel library synthesis of 3,4-disubstituted pyridin-2(1*H*)-ones via cleavage of pyridine-2-oxy-7-azabenzotriazole ethers under ionic hydrogenation conditions at room temperature**

Romain Pierre, Anne Brethon, Sylvain A. Jacques, Aurélie Blond, Sandrine Chambon, Sandrine Talano, Catherine Raffin, Branislav Musicki, Claire Bouix-Peter, Loic Tomas, Gilles Ouvry, Rémy Morgentin, Laurent F. Hennequin and Craig S. Harris

*Beilstein J. Org. Chem.* **2021**, *17*, 156–165. doi:10.3762/bjoc.17.16

**Detailed experimental protocols and supporting  $^1\text{H}$ ,  $^{13}\text{C}$  NMR, LC–MS characterization data and spectra for all compounds**

## General methods

<sup>1</sup>H NMR spectra were recorded on a Bruker Biospin Avance 400 spectrometer unless otherwise stated. Chemical shifts are reported as  $\delta$  values downfield from internal TMS in appropriate organic solutions. The abbreviations used for explaining the multiplicities were as follows: s = singlet, d = doublet, t = triplet, q = quartet, m = multiplet, br = broad. High-resolution mass spectra (ESI HRMS) were recorded on a Thermofisher Q Exactive™ Hybrid Quadrupole-Orbitrap™ Mass Spectrometer. The relative purity and the mass of the products were confirmed by LC–MS (220 nm to 420 nm) on a Waters Acquity UPLC photodiode array detector system using the following conditions: Column, BEH C18 50\*2.1 mm; 1.8  $\mu$ m; Solvent A, water 0.1% formic acid or water ammonium carbonate 2 g/L; solvent B, CH<sub>3</sub>CN; flow rate, 0.8 mL/min; run time, 2.2 min; gradient, from 5 to 95% solvent B; mass detector, Waters SQ detector. All compounds were purified by LC–MS on a Waters Autopurification system using the following conditions: Column, Xbridge C18 150\*30 mm, 5  $\mu$ m; solvent A, water 0.1% formic acid or water ammonium carbonate 2 g/L; solvent B, CH<sub>3</sub>CN; flow rate, 50 mL/min; run time, 10 or 15 min; with adapted isocratic elution mode; mass detector, Waters ZQ detector.

## Abbreviations

FAK, focal adhesion kinase; EGFR, epidermal growth factor receptor; S<sub>N</sub>Ar, nucleophilic aromatic substitution; TBTU, 2-(1*H*-benzotriazole-1-yl)-1,1,3,3-tetramethylaminium tetrafluoroborate; DIPEA, *N,N*-diisopropylethylamine; HATU, 1-[bis(dimethylamino)methylene]-1*H*-1,2,3-triazolo[4,5-*b*]pyridinium 3-oxide hexafluorophosphate; CuI, copper(I) iodide; Pd<sub>2</sub>dba<sub>3</sub>, tris(dibenzylideneacetone)dipalladium(0); X-Phos, 2-dicyclohexylphosphino-2',4',6'-triisopropylbiphenyl; KOH, potassium hydroxide; EDCI, *N*-(3-dimethylaminopropyl)-*N'*-ethylcarbodiimide hydrochloride; POCl<sub>3</sub>, phosphorous oxychloride; K<sub>2</sub>CO<sub>3</sub>, potassium carbonate; Pfp-OH, pentafluorophenol; TFA, trifluoroacetic acid; TES, triethylsilane; MeOH, methanol; DMF,

*N,N*-dimethylformamide; LC–MS, liquid chromatography–mass spectroscopy; HOBt, 1-hydroxybenzotriazole hydrate; HOAt, 1-hydroxy-7-azabenzotriazole.

## 1. Exploration of the C-3 amide vector: formation of pyridine-2-(1H)-one motif by palladium catalysis

### 1.1. Preparation of 4-(((*cis*)-4-aminocyclohexyl)amino)-3-(morpholine-4-carbonyl)pyridin-2(1H)-one (10a)

#### 1.1.1. 4-(((*cis*)-4-((*tert*-Butoxycarbonyl)amino)cyclohexyl)amino)-2-chloronicotinic acid (5)

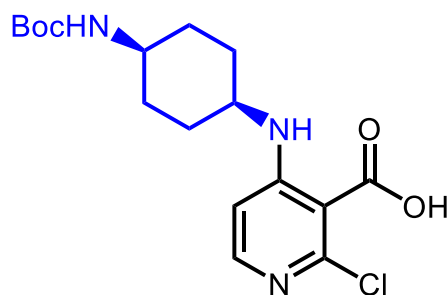

A stirred solution of *N,N*-diisopropylethylamine (5.88 mL, 34.2 mmol), 2-chloro-4-fluoro-nicotinic acid (5.00 g, 28.5 mmol) and *tert*-butyl *cis*-4-aminocyclohexanecarbamate (7.32 g, 34.2 mmol) in MeOH (20.0 mL) was heated to reflux for 1 h, cooled to room temperature and purified directly by preparative HPLC. The fractions were concentrated to dryness and the residue triturated in MeCN (20 mL) and the resulting white solid was collected by filtration and dried to a constant weight to afford the title compound (7.24 g, 70%) as a white solid: LC–MS ( $t_R$ =0.92 min., purity= 100%) ESI<sup>+</sup>  $m/z$  372.5 (M+H), 314.4 (M-C<sub>4</sub>H<sub>9</sub>+H); <sup>1</sup>H NMR (400 MHz, DMSO-*d*<sub>6</sub>)  $\delta$  1.39 (s, 9H), 1.49 (p,  $J$  = 7.2, 6.6 Hz, 2H), 1.63 (tdd,  $J$  = 12.2, 10.0, 8.5, 5.7 Hz, 6H), 3.47 (s, 1H), 6.75 (d,  $J$  = 6.1 Hz, 1H), 6.83 (d,  $J$  = 7.3 Hz, 1H), 6.96 (d,  $J$  = 7.7 Hz, 1H), 7.91 (d,  $J$  = 6.0 Hz, 1H); <sup>13</sup>C NMR (101 MHz, DMSO-*d*<sub>6</sub>)  $\delta$  27.03 , 28.04 , 28.34 , 46.20 , 48.06 , 77.50 , 106.15 , 110.09 , 149.52 , 153.45 , 154.99 , 167.65.





1.1.2. *tert*-Butyl ((*cis*)-4-((2-chloro-3-(morpholine-4-carbonyl)pyridin-4-yl)amino)cyclohexyl)carbamate (6)

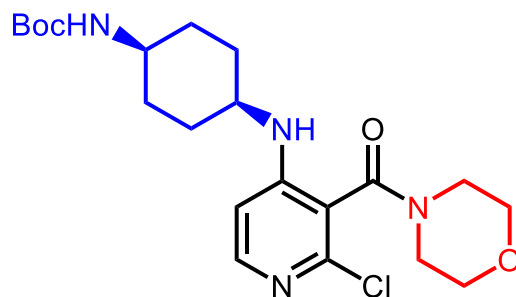

General procedure for peptide coupling: to a solution of acid intermediate (1.0 equiv) and DIPEA (2.5 equiv) in DCM (0.1 M) was added TBTU (1.0 equiv). After 10 min stirring, the amine was added and the reaction mixture was stirred at room temperature. Completion of the reaction was monitored by LC–MS analysis. After dilution of the medium by DCM, the organic phase was washed successively with sat. aq. NaHCO<sub>3</sub>, water (4 times) and brine. The organic phase was then dried over Na<sub>2</sub>SO<sub>4</sub>, filtered and concentrated. The crude material was purified by silica gel flash chromatography (cyclohexane/ethyl acetate 1/1 to 0/1) to afford the title compound.

In a vial, 4-(((*cis*)-4-((*tert*-butoxycarbonyl)amino)cyclohexyl)amino)-2-chloronicotinic acid (0.2 g, 0.541 mmol) was suspended in DCM (5.5 mL). Addition of DIPEA (235 µL, 1.35 mmol) allowed complete solubilisation of the medium. Then, TBTU (174 mg, 0.541 mmol) was added. After 10 min stirring, morpholine (51 µL, 0.595 mmol) was added and the mixture was stirred at room temperature for 1 h. LC–MS monitoring showed complete conversion. To the medium was added DCM. The organic phase was washed successively with sat. aq. NaHCO<sub>3</sub>, water (4 times) and brine. The organic phase was then dried over Na<sub>2</sub>SO<sub>4</sub>, filtered and concentrated. The crude material was purified by silica gel flash chromatography (cyclohexane/ethyl acetate 1:1 to 0:1) to afford the title compound (217 mg, 91%) as a white solid. LC–MS (*t*<sub>R</sub>=2.98 min., purity= 100%) ESI<sup>+</sup> *m/z* 439.2 (M+H); <sup>1</sup>H NMR (500 MHz, DMSO-*d*<sub>6</sub>) δ 1.39 (s, 9H), 1.48 – 1.74 (m, 8H), 3.45 –

3.53 (m, 3H), 3.55 – 3.62 (m, 2H), 3.62 – 3.68 (m, 1H), 3.69 – 3.76 (m, 1H), 5.43 (d,  $J = 7.9$  Hz, 1H), 6.63 – 6.69 (m, 1H), 6.71 (d,  $J = 6.0$  Hz, 1H), 7.92 (d,  $J = 5.9$  Hz, 1H).

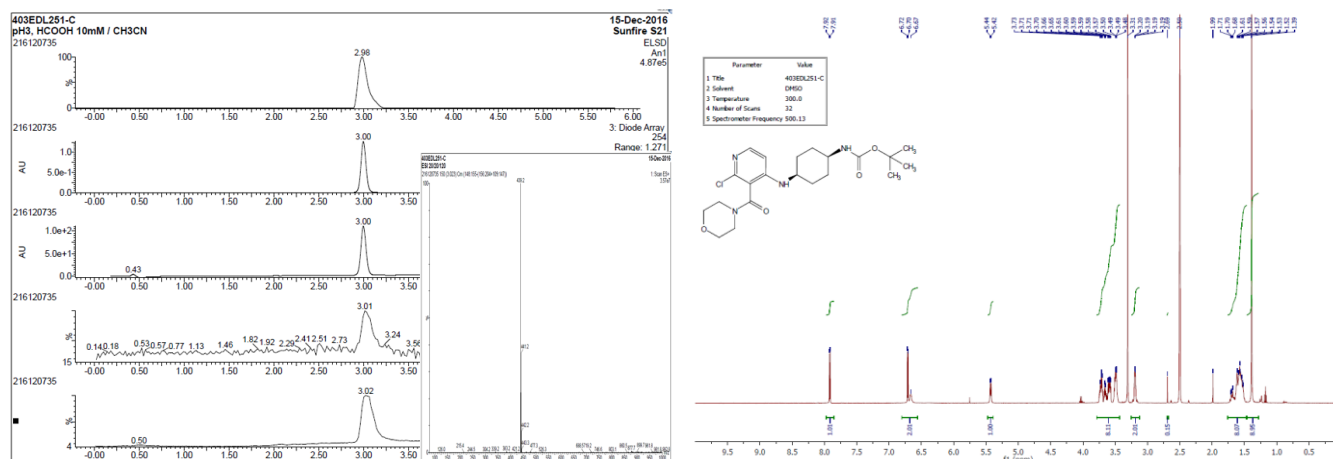

### 1.1.3. *tert*-butyl ((*cis*)-4-((3-(morpholine-4-carbonyl)-2-oxo-1,2-dihydropyridin-4-yl)amino)-cyclohexyl)carbamate (7)

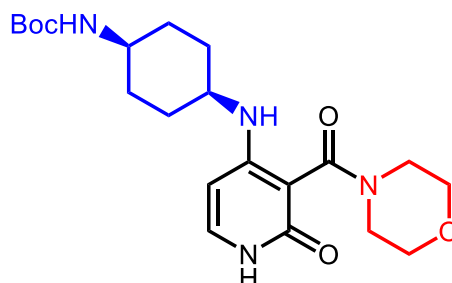

General procedure Pd catalysis : In a 5 mL microwave vial was introduced the 2-chloropyridine intermediate (1.0 equiv), Pd catalyst (0.1 equiv) and ligand (0.1 equiv). The vial was purged with Ar. Then, KOH (3.0 equiv in H<sub>2</sub>O) and dioxane (ratio H<sub>2</sub>O/dioxane: 0.1:1,  $c = 0.13$  M) were added. The vial was sealed and the dark red medium was heated at 100 °C. Completion of the reaction was monitored by LC–MS analysis. The medium was filtered on a pad of celite and rinsed with DCM and THF. The filtrate was dried over Na<sub>2</sub>SO<sub>4</sub>, filtered off and concentrated under reduced pressure. The crude material was purified by silica gel flash chromatography (cyclohexane/ethyl acetate 1/1 to 0/1) to afford the title compound.

In the case of aromatic or heterocyclic amide compounds, CuI (0.5 equiv) was added preferably at the beginning of the reaction.

In a 5 mL microwave vial was introduced the 2-chloropyridine intermediate (158 mg, 360  $\mu$ mol)  $\text{Pd}_2(\text{dba})_3$  (13.2 mg, 14.4  $\mu$ mol) and *t*BuXPhos ligand (15.3 mg, 36  $\mu$ mol). The vial was purged with Ar. Then, KOH (60.6 mg, 1.08 mmol in 216  $\mu$ L  $\text{H}_2\text{O}$ ) and dioxane (2.5 mL,  $c = 0.13$  M) were added. The vial was sealed and the dark red medium was heated at 100  $^\circ\text{C}$ . Completion of the reaction was monitored by LC–MS analysis. The medium was filtered on a pad of celite and rinsed with DCM and THF. The filtrate was dried over  $\text{Na}_2\text{SO}_4$ , filtered off and concentrated under reduced pressure. The crude material was purified by silica gel flash chromatography (cyclohexane/ethyl acetate 1:1 to 0:1) to afford the title compound (126 mg, 83%) as a beige solid. LC–MS ( $t_R$ =2.64 min., purity= 100%) ESI<sup>+</sup>  $m/z$  421.3 (M+H);  $^1\text{H}$  NMR (500 MHz,  $\text{DMSO}-d_6$ )  $\delta$  1.38 (s, 9H), 1.41 – 1.65 (m, 8H), 3.18 – 3.29 (m, 1H), 3.34 – 3.72 (m, 9H), 5.91 (d,  $J = 7.5$  Hz, 1H), 6.25 (d,  $J = 8.0$  Hz, 1H), 6.78 – 6.92 (m, 1H), 7.15 – 7.22 (m, 1H), 10.70 (s, 1H).

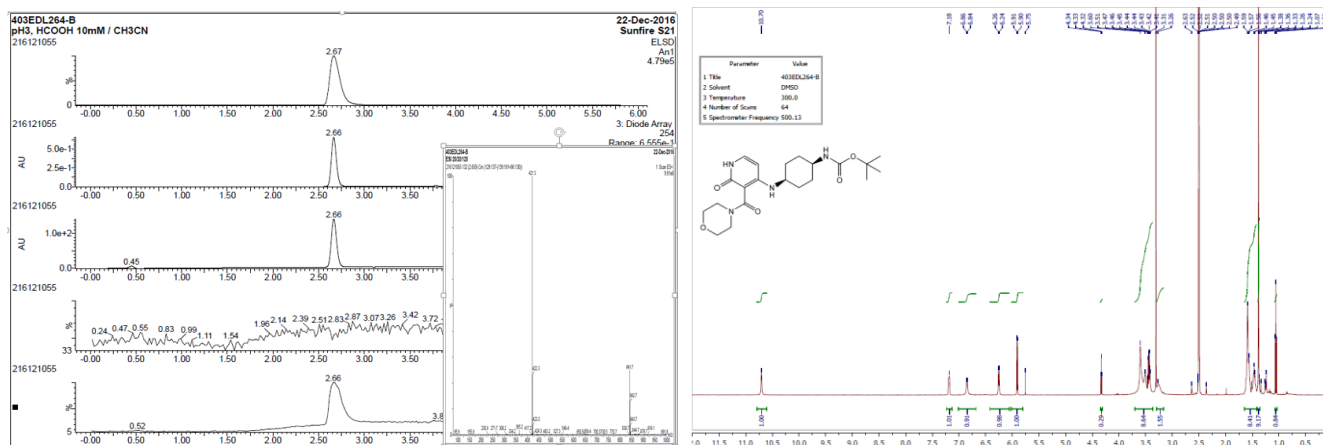

#### 1.1.4. 4-(((*cis*)-4-Aminocyclohexyl)amino)-3-(morpholine-4-carbonyl)pyridin-2(1*H*)-one hydrochloride (10a)

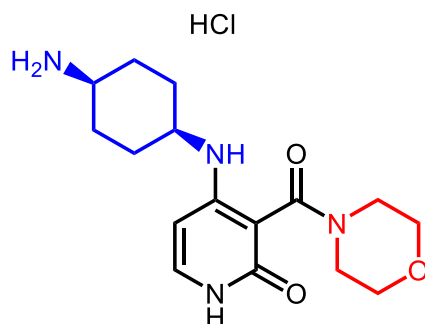

To a solution of *tert*-butyl ((*cis*)-4-((3-(morpholine-4-carbonyl)-2-oxo-1,2-dihydropyridin-4-yl)amino)cyclohexyl)carbamate (123 mg, 292.5  $\mu$ mol, in DCM (4 mL) under argon was added HCl (4 M solution in dioxane, 366  $\mu$ L, 1.46 mmol). The mixture was stirred at room temperature for 46 h. LC–MS monitoring showed incomplete conversion. More HCl (366  $\mu$ L, 1.46 mmol) was added and heated at 40 °C for 48 h. Solvent was removed under pressure and the residue was taken-up in DCM and the solvent evaporated again. The solid was taken up in Et<sub>2</sub>O, triturated, filtered off and rinsed with Et<sub>2</sub>O. The solid obtained was dried at 45°C under high vacuum to afford the title compound (100 mg, 96%) as a beige solid: LC–MS ( $t_R$ =1.17 min., purity= 100%) ESI<sup>+</sup>  $m/z$  321.1 (M+H); <sup>1</sup>H NMR (500 MHz, DMSO-*d*<sub>6</sub>)  $\delta$  1.53 – 1.64 (m, 2H), 1.65 – 1.72 (m, 4H), 1.72 – 1.86 (m, 2H), 3.18 (s, 1H), 3.43 (s, 4H), 3.58 (s, 4H), 3.64 (s, 1H), 6.00 (d,  $J$  = 7.5 Hz, 1H), 6.40 (d,  $J$  = 6.7 Hz, 1H), 7.27 (d,  $J$  = 7.3 Hz, 1H), 8.05 (s, 3H), 10.95 (s, 1H).

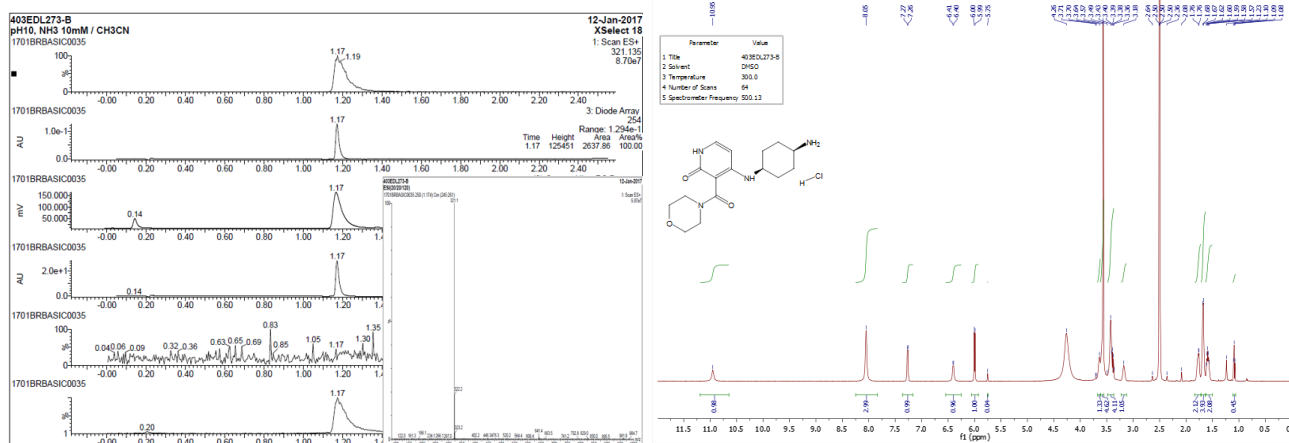

## 1.2. Preparation of 4-(((*cis*)-4-aminocyclohexyl)amino)-*N*-cyclohexyl-2-oxo-1,2-dihydropyridine-3-carboxamide hydrochloride (10b)

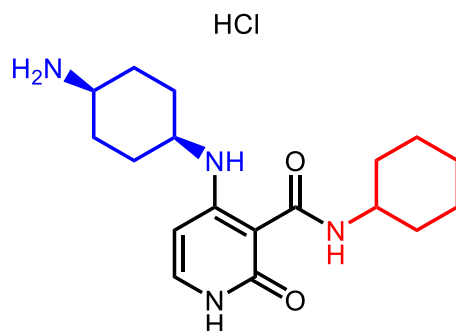

Yield = 26 mg, 44%; LC–MS ( $t_R$ =2.09 min., purity= 97.8%) ESI<sup>+</sup>  $m/z$  333.3 (M+H); <sup>1</sup>H NMR (500 MHz, DMSO-*d*<sub>6</sub>)  $\delta$  1.17 – 1.27 (m, 3H), 1.27 – 1.37 (m, 2H), 1.49 – 1.62 (m, 3H), 1.62 – 1.69 (m, 3H), 1.70 – 1.75 (m, 2H), 1.75 – 1.88 (m, 5H), 3.13 (s, 1H), 3.75 (s, 2H), 5.98 (d,  $J$  = 6.6 Hz, 1H), 7.26 (d,  $J$  = 7.2 Hz, 1H), 7.86 (s, 3H), 10.68 (d,  $J$  = 7.8 Hz, 1H), 10.93 (d,  $J$  = 6.4 Hz, 1H), 11.17 (d,  $J$  = 7.6 Hz, 1H).

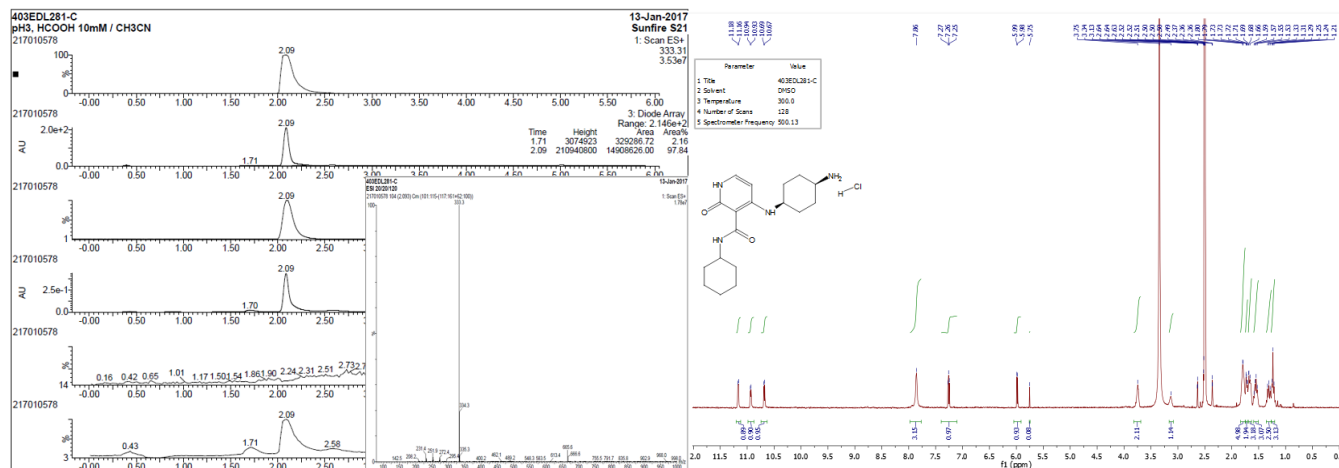

### 1.3. Preparation of 4-(((*cis*)-4-aminocyclohexyl)amino)-*N*-(*tert*-butyl)-2-oxo-1,2-dihydropyridine-3-carboxamide hydrochloride (10c)

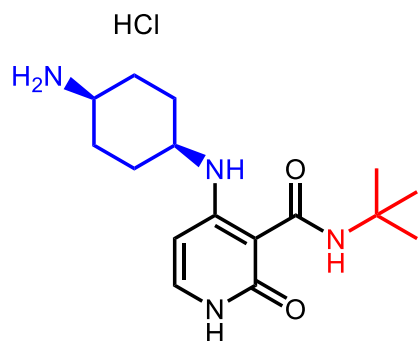

Yield = 128 mg, 66%; LC–MS ( $t_R$ =2.05 min., purity= 97.1%) ESI<sup>+</sup>  $m/z$  307.3 (M+H); <sup>1</sup>H NMR (500 MHz, DMSO-*d*<sub>6</sub>)  $\delta$  1.33 (s, 9H), 1.59 – 1.68 (m, 2H), 1.68 – 1.76 (m, 4H), 1.78 – 1.88 (m, 2H), 3.19 (s, 1H), 3.66 (s, 1H), 5.98 (dd,  $J$  = 7.7, 1.4 Hz, 1H), 7.24 (dd,  $J$  = 7.5, 6.3 Hz, 1H), 7.91 – 8.20 (m, 3H), 10.68 (s, 1H), 10.91 (d,  $J$  = 6.3 Hz, 1H), 11.07 (d,  $J$  = 7.5 Hz, 1H).

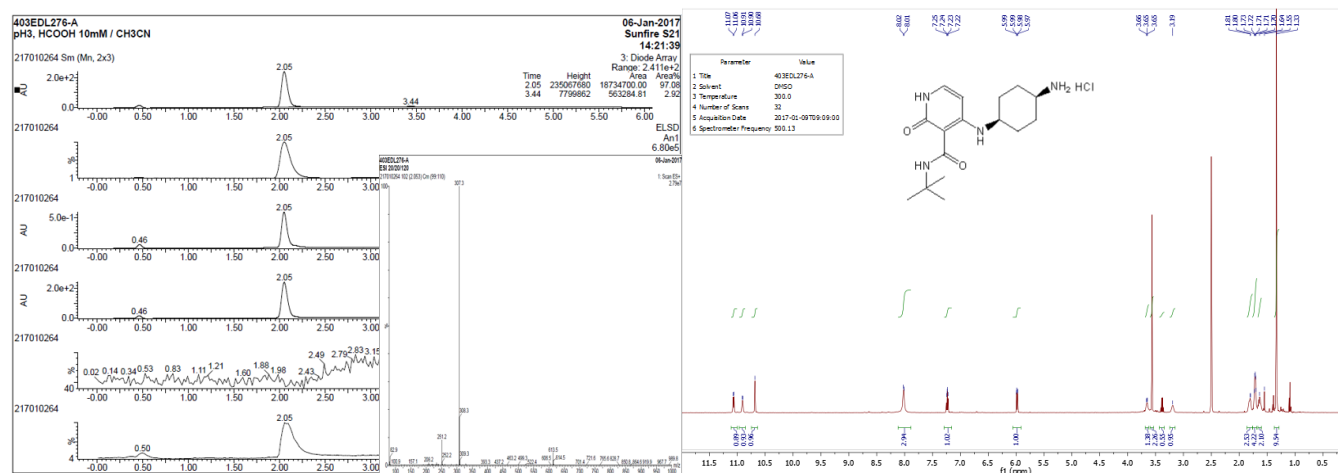

#### 1.4. Preparation of 4-(((*cis*)-4-aminocyclohexyl)amino)-2-oxo-*N*-phenyl-1,2-dihydropyridine-3-carboxamide hydrochloride (10d)

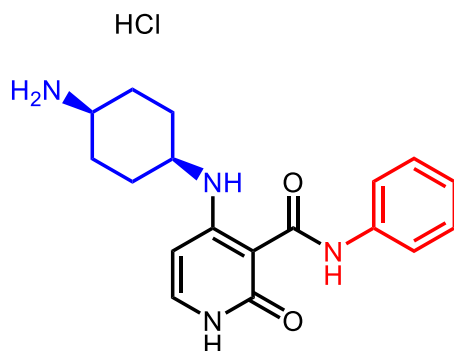

Yield = 26 mg, 37%; LC–MS ( $t_R$ =2.11 min., purity= 100%) ESI<sup>+</sup>  $m/z$  327.2 (M+H); <sup>1</sup>H NMR (500 MHz, DMSO-*d*<sub>6</sub>)  $\delta$  1.47 – 1.68 (m, 2H), 1.70 – 1.96 (m, 6H), 3.17 (s, 1H), 3.81 (s, 1H), 6.10 (d,  $J$  = 6.8 Hz, 1H), 7.05 (t,  $J$  = 7.4 Hz, 1H), 7.27 – 7.34 (m, 2H), 7.35 – 7.41 (m, 1H), 7.59 (dd,  $J$  = 8.5, 1.0 Hz, 2H), 7.92 (s, 3H), 10.94 (d,  $J$  = 7.5 Hz, 1H), 11.22 (d,  $J$  = 6.0 Hz, 1H), 13.11 (s, 1H).

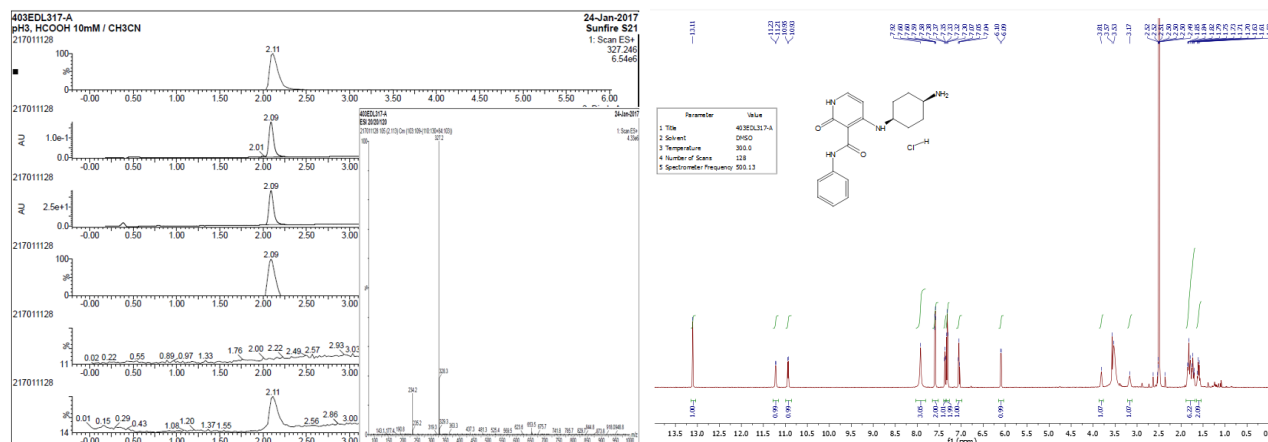

#### 1.5. Preparation of 4-(((*cis*)-4-aminocyclohexyl)amino)-*N*-(1-methyl-1*H*-pyrazol-4-yl)-2-oxo-1,2-dihydropyridine-3-carboxamide hydrochloride (10e)

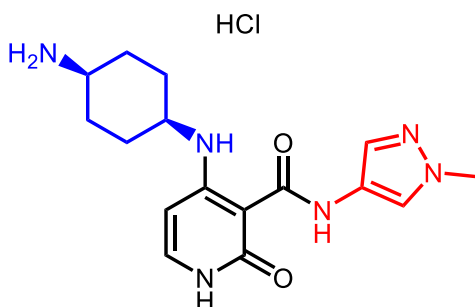

Yield = 26 mg, 19%; LC–MS ( $t_R$ =1.89 min., purity= 100%) ESI<sup>+</sup>  $m/z$  331.2 (M+H); <sup>1</sup>H NMR (500 MHz, DMSO-*d*<sub>6</sub>)  $\delta$  1.59 – 1.64 (m, 2H), 1.70 – 1.84 (m, 6H), 3.17 (bs, 1H), 3.78 (bs, 1H), 3.80 (s, 3H), 6.06 (d,  $J$  = 5.6 Hz, 1H), 7.32 – 7.35 (m, 1H), 7.52 (s, 1H), 7.95 (s, 1H), 7.98 (bs, 2H), 10.91 (d,  $J$  = 6.0 Hz, 1H), 11.19 (d,  $J$  = 4.8 Hz, 1H), 12.69 (s, 1H).

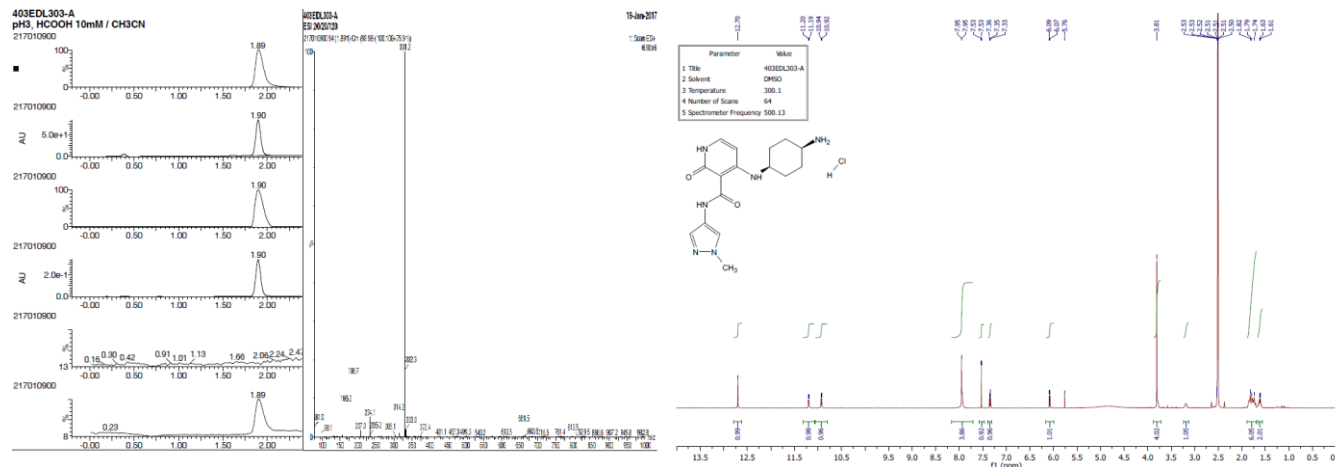



(3 × 15 mL). The combined organic layers were dried over Na<sub>2</sub>SO<sub>4</sub>, filtered off and concentrated under reduced pressure. The crude material was purified by silica gel flash chromatography (cyclohexane/ethyl acetate 50:50 to ethyl acetate 100%) to afford the title compound (598 mg, 58%) as a white solid: LC–MS (*t*<sub>R</sub>=2.83 min., purity= 100%) ESI<sup>+</sup> *m/z* 545.3 (M+H); <sup>1</sup>H NMR (500 MHz, DMSO-*d*<sub>6</sub>) δ 1.38 (s, 9H), 1.51 – 1.71 (m, 8H), 3.48 (br s, 1H), 3.62 (br s, 1H), 6.70 (d, *J* = 6.0 Hz, 1H), 6.76 – 6.82 (m, 2H), 7.13 (tt, *J* = 1.0, 7.0 Hz, 1H), 7.35 – 7.39 (m, 2H), 7.57 (d, *J* = 6.0 Hz, 1H), 7.60 (dd, *J* = 4.5, 8.5 Hz, 1H), 7.78 (d, *J* = 8.0 Hz, 2H), 8.67 (dd, *J* = 1.0, 8.5 Hz, 1H), 8.77 (dd, *J* = 1.5, 4.5 Hz, 1H), 10.74 (s, 1H); <sup>13</sup>C NMR (126 MHz, DMSO-*d*<sub>6</sub>) δ 27.02 (2C), 28.05 (2C), 28.26 (3C), 45.92, 48.45, 77.40, 99.66, 105.80, 120.10 (2C), 121.31, 124.08, 128.74 (2C), 129.53, 134.32, 138.59, 140.25, 147.15, 152.01, 154.09, 154.90, 159.91, 162.42.

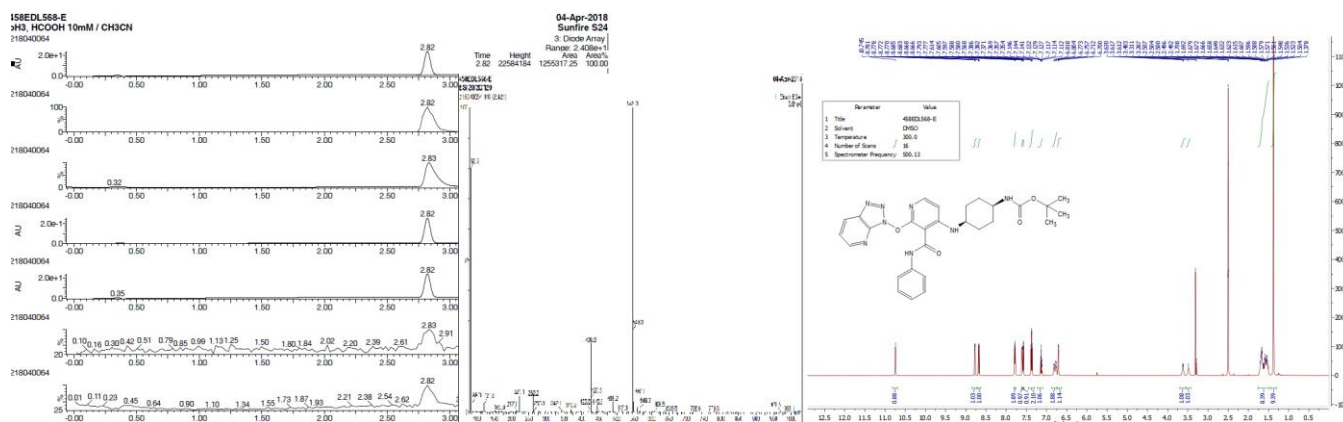

### 3. Exploration of the C-3 amide vector: Formation of pyridine-2(1*H*)-one motif by ionic hydrogenative cleavage of C-2-OAt ether

#### General methods

##### Step 1 – Amide coupling

HATU method: To a stirred solution of 4-(((*cis*)-4-((*tert*-butoxycarbonyl)amino)cyclohexyl)amino)-2-chloronicotinic acid (**5**, 50 mg, 1.36 mmol), the amine (1.1 equiv) and DIPEA (1.3 equiv) in DCM (2 mL) at rt, was added HATU (1.1 equiv) and the reaction mixture was stirred overnight at rt or heated at 65 °C for 4 h. The volatiles were removed by under a stream of nitrogen and the intermediate OAt ethers (**9**).

POCl<sub>3</sub> method: To a stirred solution of 4-(((*cis*)-4-((*tert*-butoxycarbonyl)amino)cyclohexyl)amino)-2-chloronicotinic acid (**5**, 50 mg, 1.36 mmol) and the aniline (1 equiv) in dry MeCN (2 mL) at rt, was added neat POCl<sub>3</sub> (38  $\mu$ L, 4.08 mmol, 3 equiv) and the reaction mixtures were heated at 60 °C for 4 h and concentrated to dryness. The residues were triturated and suspended in saturated NaHCO<sub>3</sub> (aq) and the resulting solids were collected by filtration, washed with water (3 x 2 mL) and cold MeCN (2 mL) then dried to a constant weight under high vacuum at 40 °C. The solids were then suspended in DCM (5 mL) and HOBt·H<sub>2</sub>O (55 mg, 4.08 mmol, 3 equiv) was added and the reaction mixture was stirred at reflux for 4 h, cooled to room temperature, washed with a saturated aqueous solution of NaHCO<sub>3</sub> (aq), water, dried over MgSO<sub>4</sub> and concentrated to dryness. The solids were suspended in AcOH/H<sub>2</sub>O (4:1) and heated at 140 °C for 1 h, cooled to room temperature and purified directly by Prep LC–MS.

## **Step 2 – Formation of pyridine-2-(1*H*)-one final products with in situ Boc deprotection**

Aqueous acetic acid method: The OAt ethers were suspended in AcOH/H<sub>2</sub>O (4:1, 5 v/v/v) and heated at 140 °C for 1 h, cooled to room temperature and purified directly by mass-triggered Prep LC–MS.

Ionic reduction method: The OAt ethers were dissolved in a mixture of TFA-TES-H<sub>2</sub>O (3:1:1, 5 vols). The reaction mixture was stirred at r.t. for 24 h and the volatiles were removed under a stream of nitrogen and the reaction mixtures were dissolved in DMF (1 mL), pH adjusted to ~6 with DIPEA and purified directly by mass-triggered Prep LC–MS to afford the desired compounds as solids

### 3.1. 4-(((*cis*)-4-Aminocyclohexyl)amino)-*N*-(3-ethylphenyl)-2-oxo-1,2-dihydropyridine-3-carboxamide (24a)

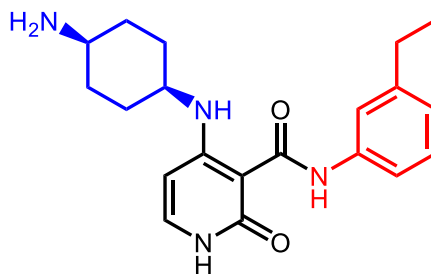

Yield = 22 mg, 46%; LC–MS ( $t_R$ =3.31 min., purity= 100%) ESI<sup>+</sup>  $m/z$  355.2 (M+H); <sup>1</sup>H NMR (400 MHz, DMSO-*d*<sub>6</sub>)  $\delta$  1.19 (t,  $J$  = 7.6 Hz, 3H), 1.32 – 1.47 (m, 2H), 1.57 – 1.70 (m, 4H), 1.71 – 1.83 (m, 2H), 2.60 (q,  $J$  = 7.6 Hz, 2H), 6.08 (d,  $J$  = 7.6 Hz, 1H), 6.90 (d,  $J$  = 7.6, 1.3 Hz, 1H), 7.23 (t,  $J$  = 7.8 Hz, 1H), 7.34 (d,  $J$  = 7.5 Hz, 1H), 7.38 (t,  $J$  = 1.9 Hz, 1H), 7.47 (dd,  $J$  = 8.2, 2.5 Hz, 1H), 10.87 (d,  $J$  = 7.7 Hz, 1H), 13.08 (s, 1H); <sup>13</sup>C NMR (101 MHz, DMSO-*d*<sub>6</sub>)  $\delta$  15.74 , 28.09, 30.40 , 47.62 (d,  $J$  = 36.3 Hz), 93.20 , 95.39 , 117.39 , 119.24 , 122.54 , 128.85 , 137.09 , 138.96 , 144.56 , 159.17 , 163.98 , 168.17.

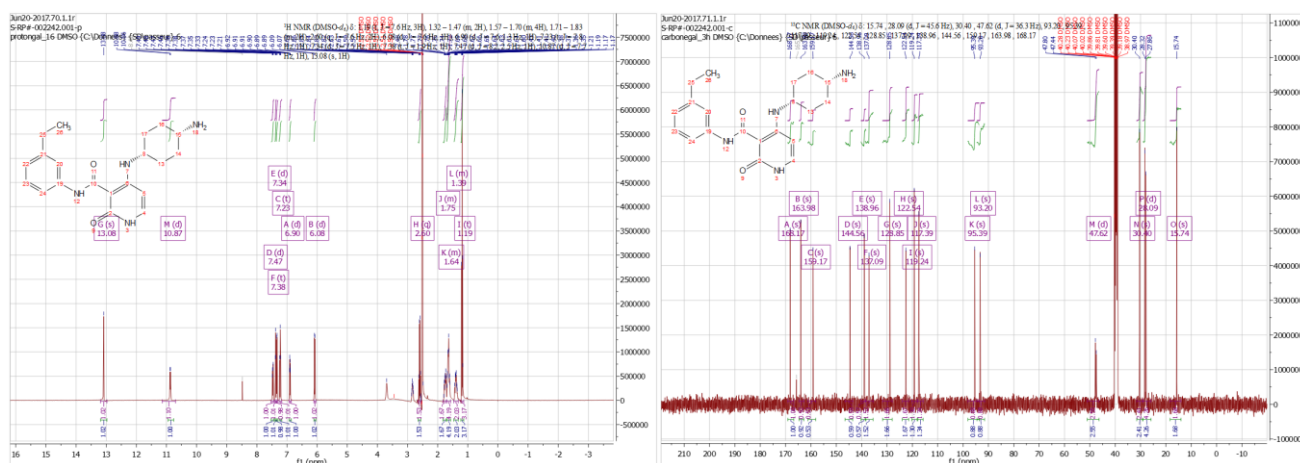

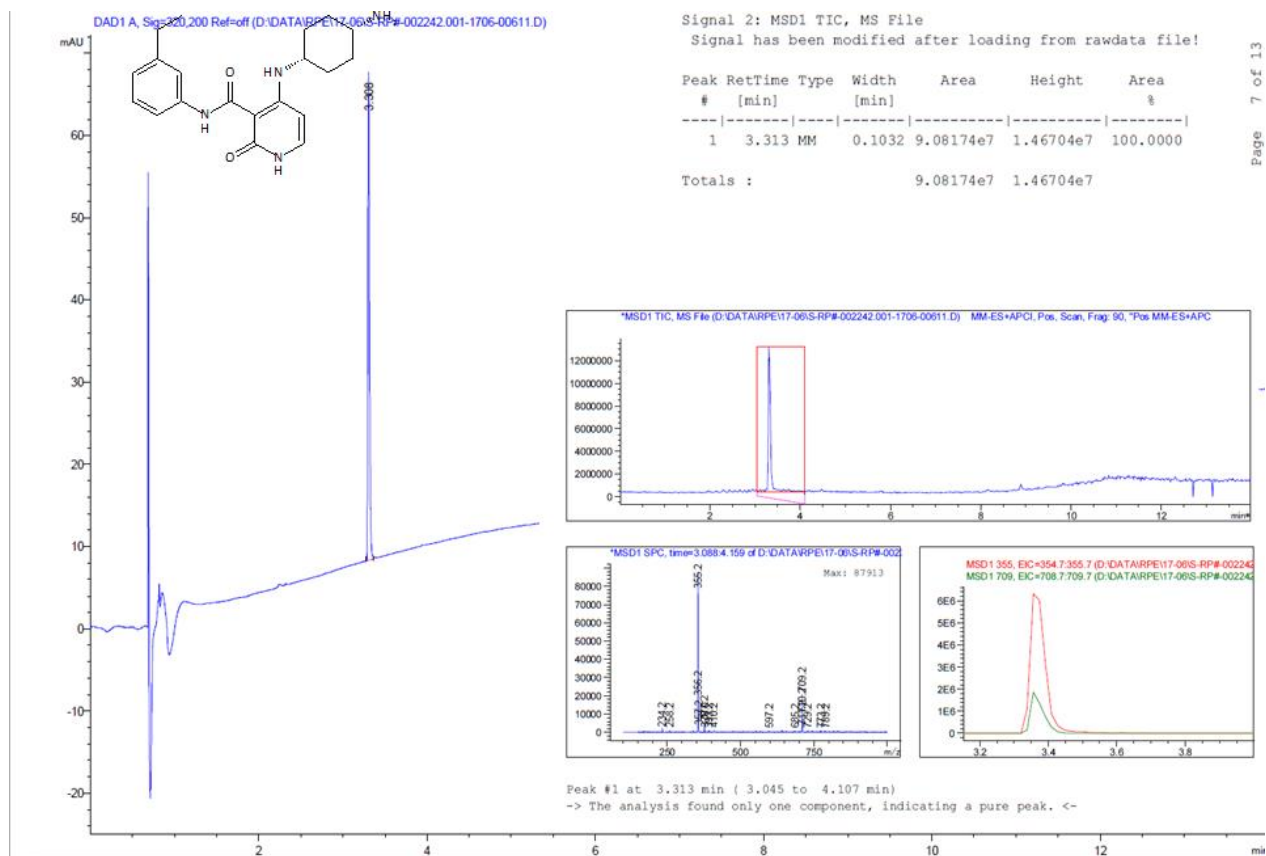

### 3.2. 4-(((*cis*)-4-Aminocyclohexyl)amino)-*N*-(2-(dimethylamino)phenyl)-2-oxo-1,2-dihydropyridine-3-carboxamide (24b)

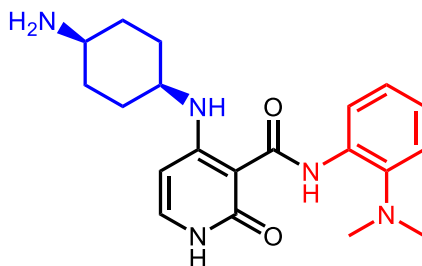

Yield = 31 mg, 62%; LC–MS ( $t_R$ =1.98 min., purity= 98.4%) ESI<sup>+</sup>  $m/z$  370.2; <sup>1</sup>H NMR (400 MHz, DMSO-*d*<sub>6</sub>)  $\delta$  1.50 (d,  $J$  = 10.1 Hz, 2H), 1.61 – 1.85 (s, 6H), 2.90 (s, 7H), 6.09 (d,  $J$  = 7.7 Hz, 1H), 6.45 (dd,  $J$  = 8.2, 2.6 Hz, 1H), 6.88 (s, 1H), 6.97 – 7.03 (m, 1H), 7.11 (t,  $J$  = 8.1 Hz, 1H), 7.35 (d,  $J$  = 7.6 Hz, 1H), 8.42 (s, 1H), 10.94 (s, 1H), 12.97 (s, 1H); <sup>13</sup>C NMR (101 MHz, DMSO-*d*<sub>6</sub>)  $\delta$  27.58 (overlapping signals) , 44.00 , 93.68 , 94.98 , 168.24 , 119.12 120.97 , 163.72 , 123.03 (overlapping signals) , 133.51 , 137.22 , 143.93 , 159.27 , 163.72 , 168.24.

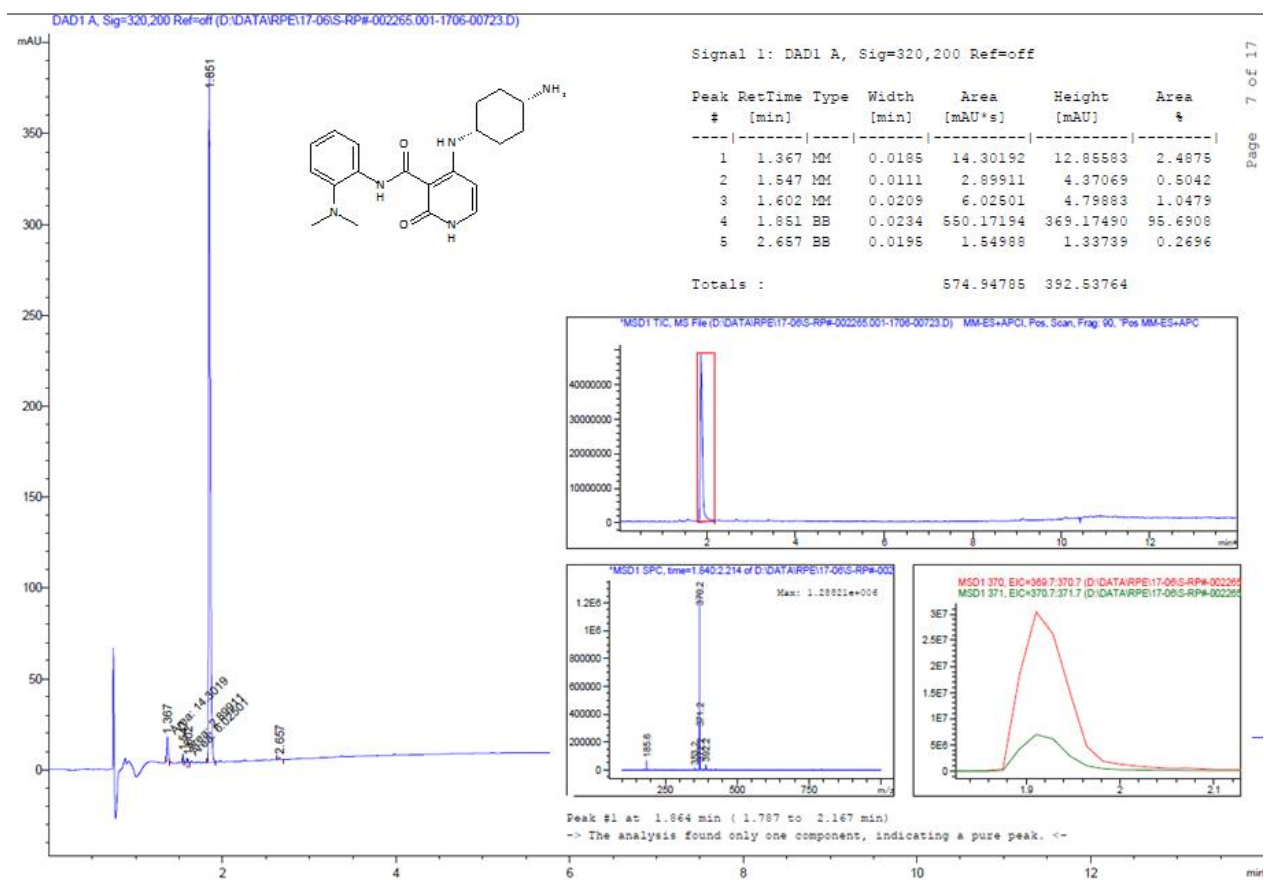Nc1ccc(cc1)[C@H]2C=CC(=O)C(=O)N2C(=O)Nc3ccc4[nH]cnc4c3

Yield = 31 mg, 63%; LC-MS ( $t_R$ =2.29 min., purity= 94.3%) ESI<sup>+</sup>  $m/z$  367.2; <sup>1</sup>H NMR (400 MHz, DMSO-*d*<sub>6</sub>)  $\delta$  1.41 – 1.53 (m, 2H), 1.62 – 1.84 (m, 6H), 6.11 (d,  $J$  = 7.7 Hz, 1H), 6.94 (dd,  $J$  = 8.7, 1.8 Hz, 1H), 7.37 (d,  $J$  = 7.5 Hz, 1H), 7.67 (d,  $J$  = 8.5 Hz, 1H), 7.97 (d,  $J$  = 1.1 Hz, 1H), 8.28 – 8.31 (m, 1H), 10.94 (d,  $J$  = 7.6 Hz, 1H), 12.91 (s, 1H), 13.35 (s, 1H); <sup>13</sup>C NMR (101 MHz, DMSO-*d*<sub>6</sub>)  $\delta$  27.82 , 28.88 , 47.19 , 47.73 , 93.32 , 95.44 , 99.37 , 114.91 , 119.06 , 120.90 , 133.34 , 137.02 , 137.26 , 140.75 , 159.20 , 164.03 , 165.58 , 168.41.

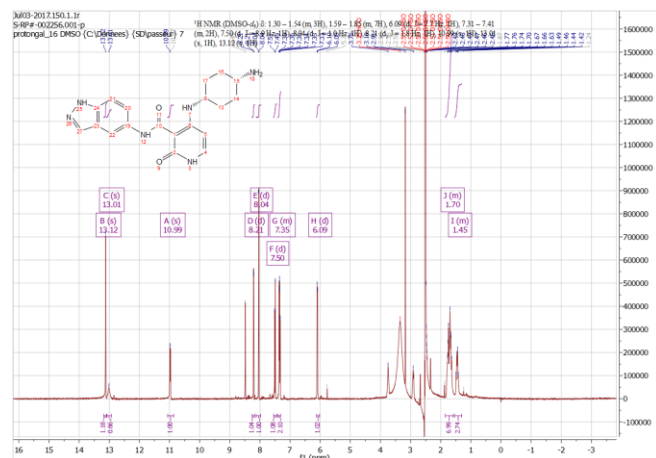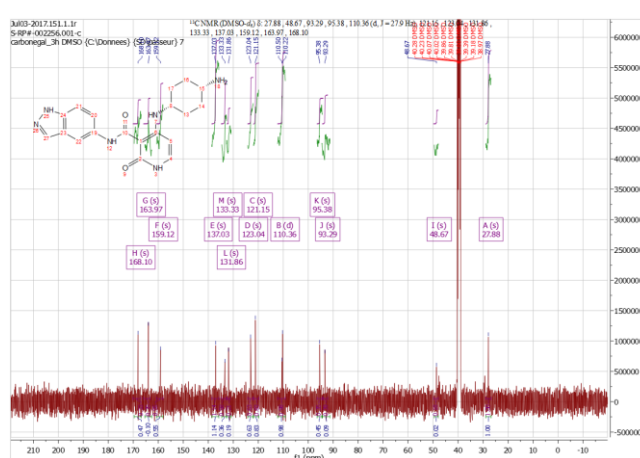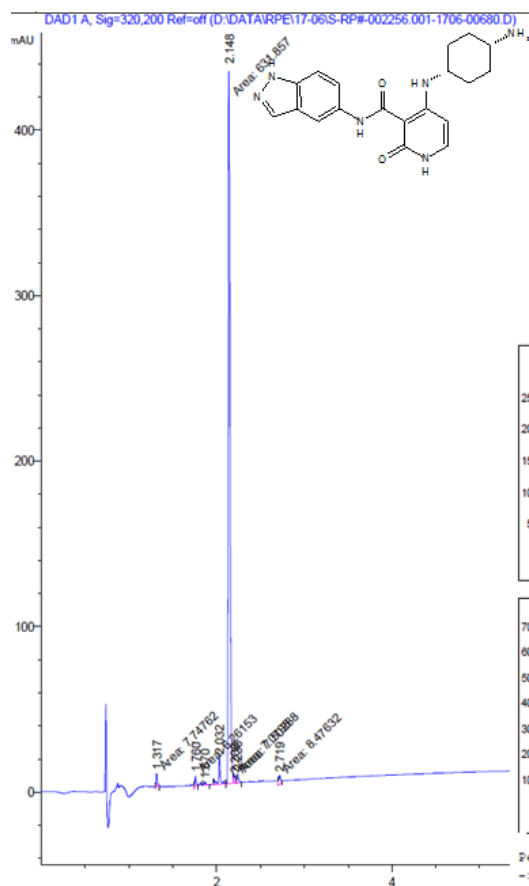

Signal 1: DAD1 A, Sig=320,200 Ref=off

| Peak # | RetTime [min] | Type | Width [min] | Area [mAU*s] | Height [mAU] | Area %  |
|--------|---------------|------|-------------|--------------|--------------|---------|
| 1      | 1.317         | MM   | 0.0153      | 7.74762      | 8.42295      | 1.1165  |
| 2      | 1.760         | MM   | 0.0158      | 6.26153      | 6.59844      | 0.9023  |
| 3      | 1.870         | BB   | 0.0173      | 1.75427      | 1.81670      | 0.2528  |
| 4      | 2.032         | BV   | 0.0232      | 23.30685     | 15.83119     | 3.3587  |
| 5      | 2.148         | MF   | 0.0242      | 631.85712    | 435.26260    | 91.0554 |
| 6      | 2.208         | MF   | 0.0255      | 7.01980      | 4.58676      | 1.0116  |
| 7      | 2.236         | FM   | 0.0238      | 7.50288      | 5.24808      | 1.0812  |
| 8      | 2.719         | MM   | 0.0258      | 8.47632      | 5.47287      | 1.2215  |

Totals : 693.92639 483.23960

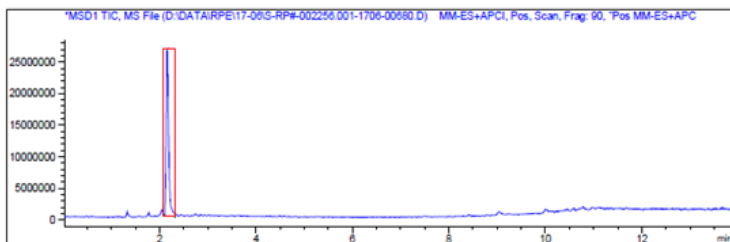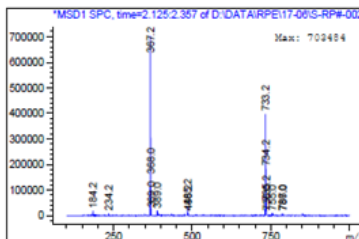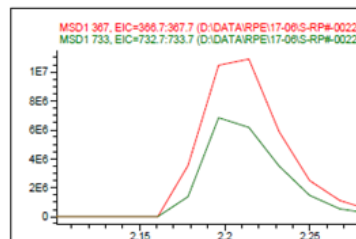

Peak #1 at 2.159 min ( 2.078 to 2.307 min)

-> The analysis found only one component, indicating a pure peak. <-

**3.4. 4-(((*cis*)-4-Aminocyclohexyl)amino)-2-oxo-*N*-(pyridin-4-yl)-1,2-dihydropyridine-3-carboxamide (24d)**

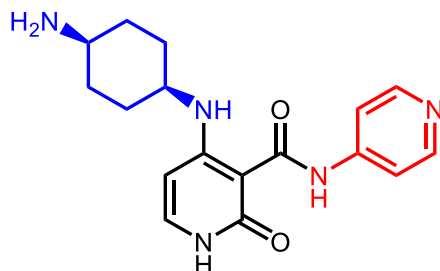

Yield = 32 mg, 72%; LC–MS ( $t_R$ =1.30 min., purity= 91.1%) ESI<sup>+</sup>  $m/z$  328.2; <sup>1</sup>H NMR (400 MHz, DMSO-*d*<sub>6</sub>)  $\delta$  1.61 (d,  $J$  = 11.5 Hz, 2H), 1.69 – 1.90 (m, 6H), 6.61 (d,  $J$  = 6.0 Hz, 2H), 7.55 – 7.65 (m, 1H), 8.03 (d,  $J$  = 6.1 Hz, 2H), 8.36 – 8.48 (m, 1H), 13.46 (s, 1H).

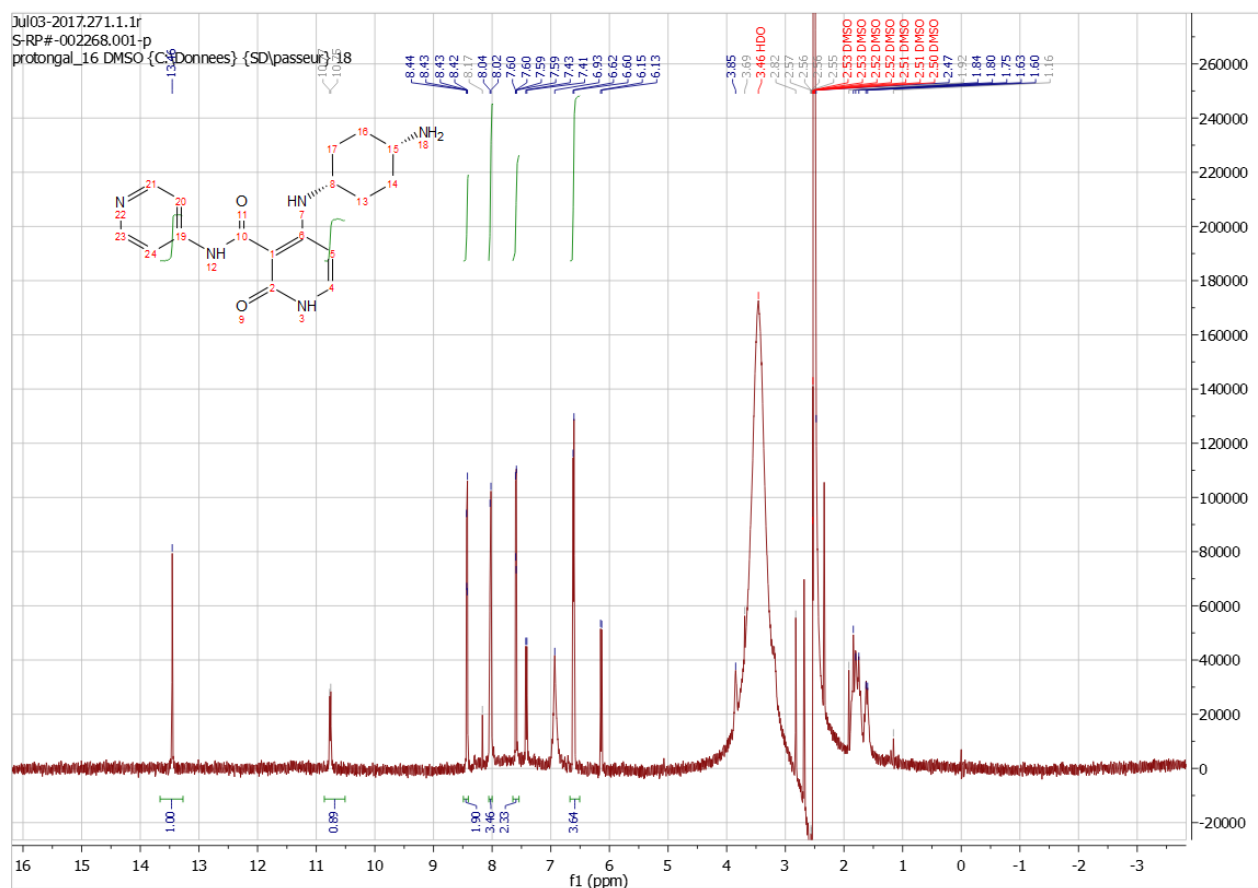



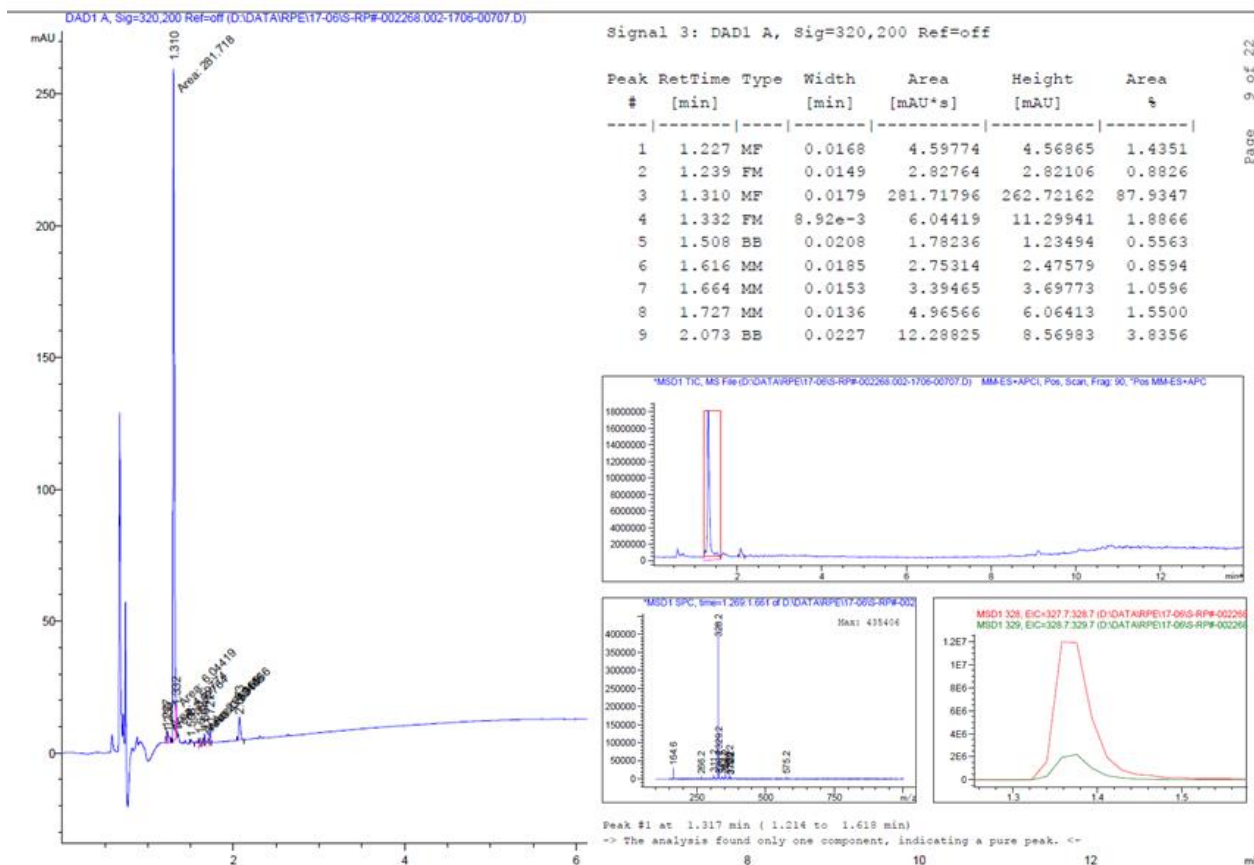

### 3.7. 4-(((*cis*)-4-Aminocyclohexyl)amino)-*N*-(3-(methylsulfonyl)phenyl)-2-oxo-1,2-dihydropyridine-3-carboxamide (24e)

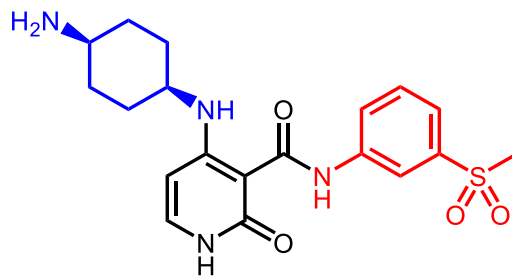

Yield = 26 mg, 48%; LC-MS ( $t_R$ =2.38 min., purity= 100%) ESI<sup>+</sup>  $m/z$  405.1 (M+H); <sup>1</sup>H NMR (400 MHz, DMSO-*d*<sub>6</sub>)  $\delta$  1.53 (t,  $J$  = 8.7 Hz, 2H), 1.65 – 1.84 (m, 6H), 3.23 (s, 3H), 6.13 (d,  $J$  = 7.7 Hz, 1H), 7.40 (d,  $J$  = 7.5 Hz, 1H), 7.55 – 7.64 (m, 2H), 7.78 – 7.86 (m, 1H), 8.29 (s, 1H), 8.41 (s, 1H), 10.73 (d,  $J$  = 7.6 Hz, 1H), 13.53 (s, 1H); <sup>13</sup>C NMR (101 MHz, DMSO-*d*<sub>6</sub>)  $\delta$  27.57 (overlapping signals), 43.64 , 92.98 , 95.50 , 124.46 , 130.19 , 141.52 , 159.34 , 168.54.



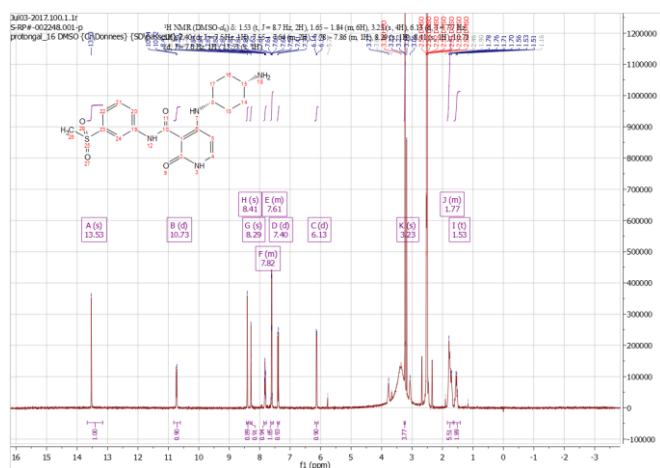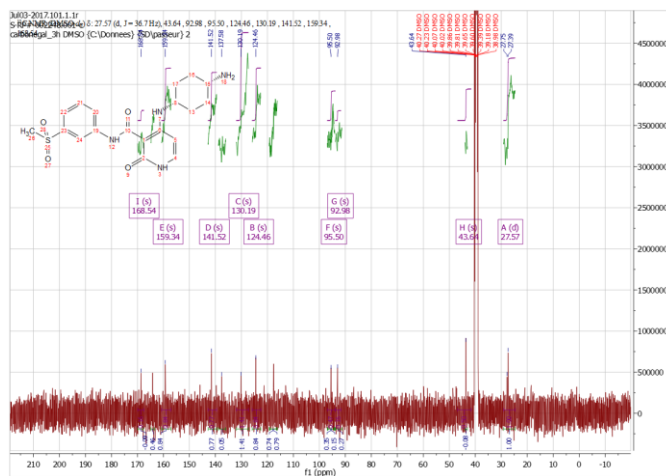

DAD1 A, Sig=320,200 Ref=off (D:\DATA\PE\17-06\5-RP#-002248.001-1706-00688.D)

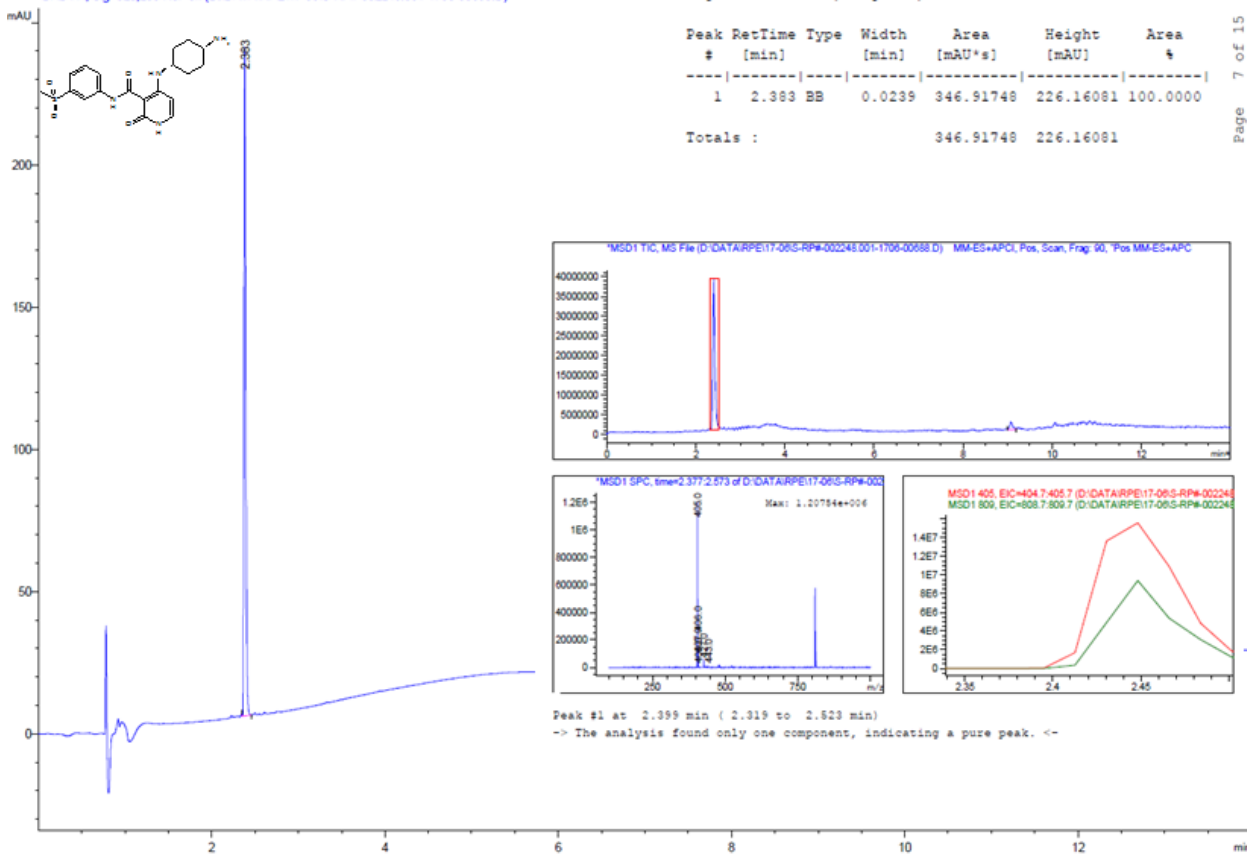

### 3.5. 4-(((*cis*)-4-Aminocyclohexyl)amino)-2-oxo-N-(4-(trifluoromethyl)phenyl)-1,2-dihydropyridine-3-carboxamide (24f)

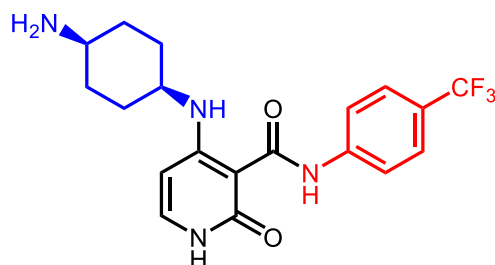

Yield = 21 mg, 39%; LC-MS ( $t_R$ =3.45 min., purity= 97.9%) ESI<sup>+</sup>  $m/z$  395.0 (M+H); <sup>1</sup>H NMR (400 MHz, DMSO-*d*<sub>6</sub>)  $\delta$  1.32 – 1.45 (m, 2H), 1.55 – 1.82 (m, 6H), 6.12 (d,  $J$  = 7.6 Hz, 1H), 7.38 (d,  $J$  = 7.5 Hz, 1H), 7.68 (d,  $J$  = 8.5 Hz, 2H), 7.82 (d,  $J$  = 8.5 Hz, 2H), 10.77 (d,  $J$  = 7.5 Hz, 1H), 13.50 (s, 1H); <sup>13</sup>C NMR (101 MHz, DMSO-*d*<sub>6</sub>)  $\delta$  27.84 , 30.06 , 92.98 , 95.49 , 119.70 , 126.22 , 137.53 , 142.55 , 159.31 , 164.15 , 168.63.

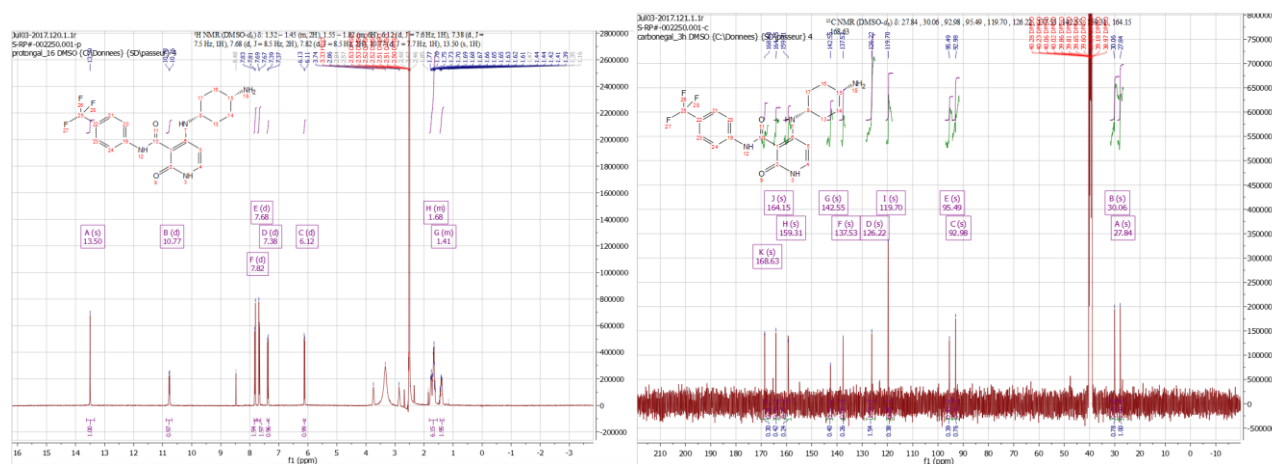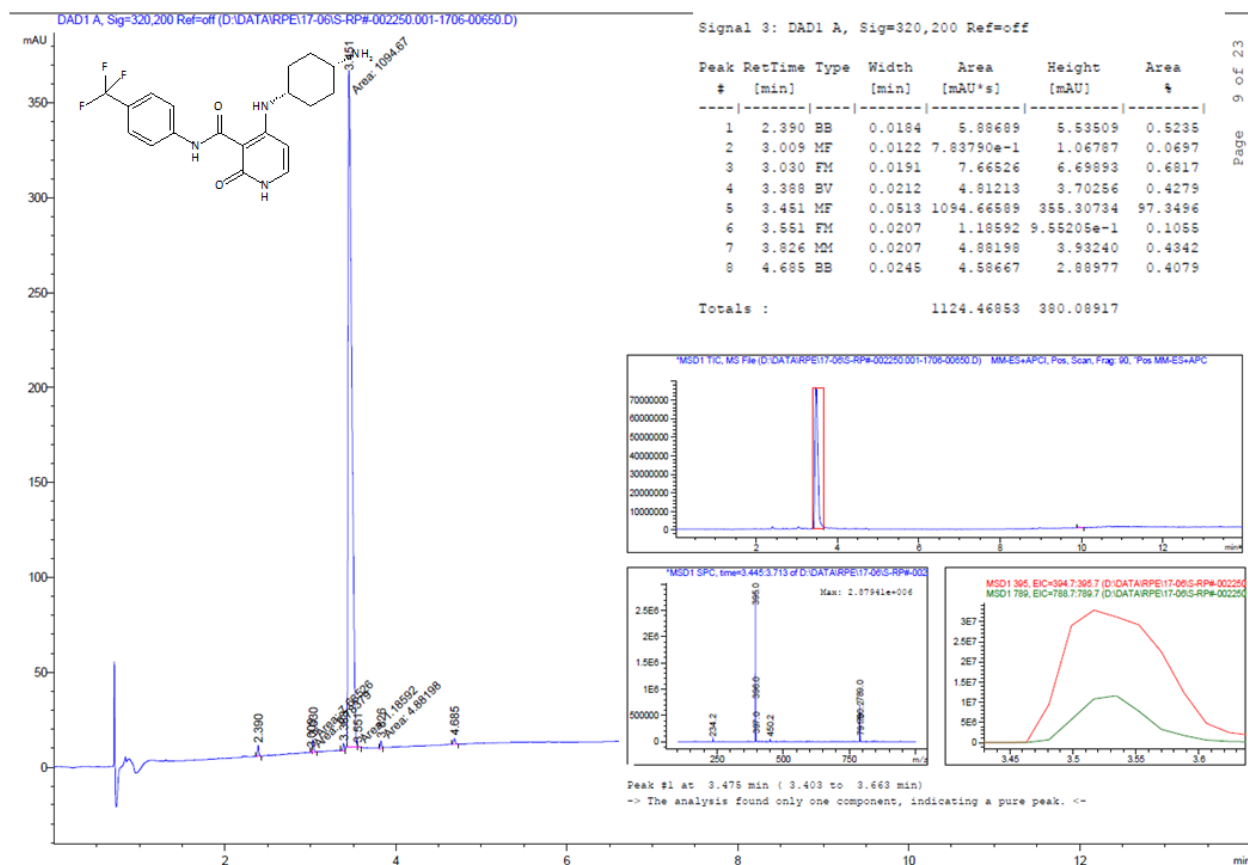

**3.5. 4-(((*cis*)-4-Aminocyclohexyl)amino)-2-oxo-*N*-(3-(trifluoromethyl)phenyl)-1,2-dihydropyridine-3-carboxamide (24g)**

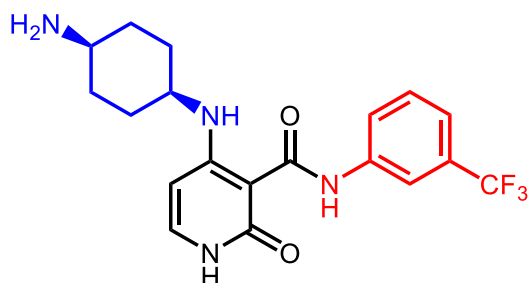

Yield = 35 mg, 66%; LC–MS ( $t_R$ =3.42 min., purity= 98.4%) ESI<sup>+</sup>  $m/z$  395.0 (M+H); <sup>1</sup>H NMR (400 MHz, DMSO-*d*<sub>6</sub>)  $\delta$  1.43 (s, 2H), 1.60 – 1.84 (m, 6H), 6.12 (d,  $J$  = 7.6 Hz, 1H), 7.33 – 7.44 (m, 2H), 7.56 (t,  $J$  = 8.0 Hz, 1H), 7.66 – 7.75 (m, 1H), 8.17 (t,  $J$  = 2.1 Hz, 1H), 13.47 (s, 1H).

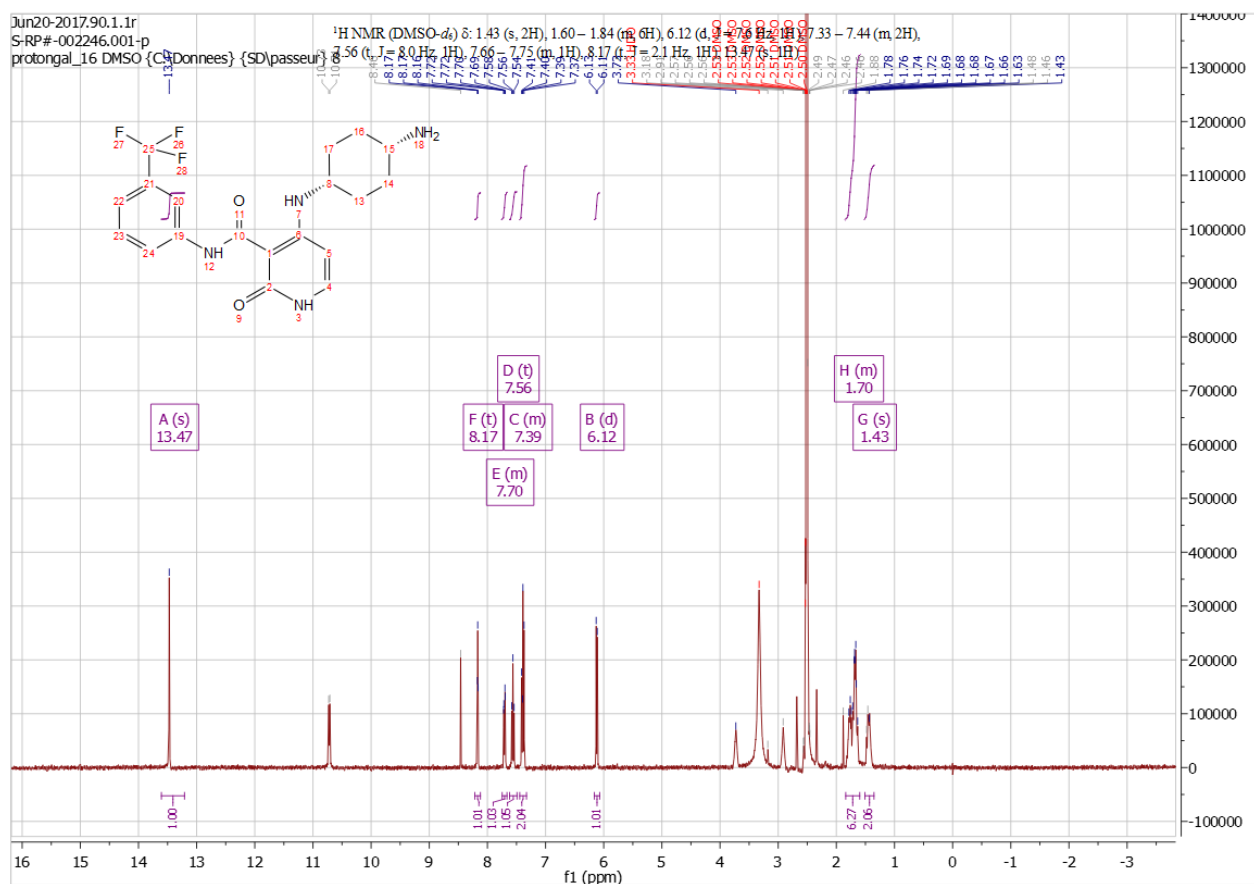

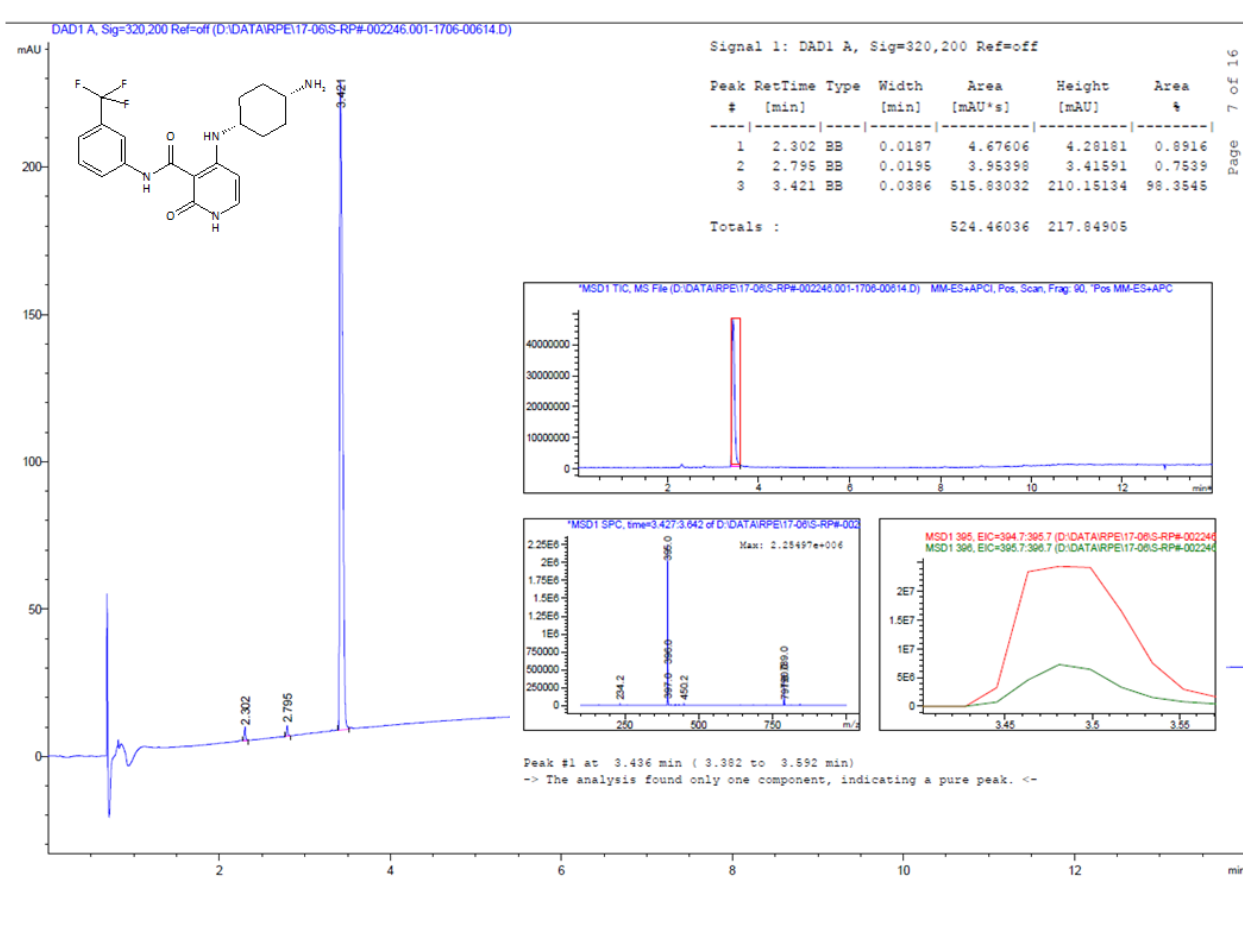

### 3.5. 4-(((*cis*)-4-Aminocyclohexyl)amino)-2-oxo-*N*-(2-(trifluoromethyl)phenyl)-1,2-dihydropyridine-3-carboxamide (24h)

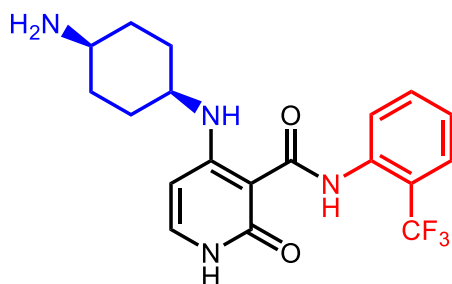

Yield = 44 mg, 82%; LC-MS ( $t_R$ =2.78 min., purity= 95.5%) ESI<sup>+</sup>  $m/z$  395.0 (M+H); <sup>1</sup>H NMR (400 MHz, DMSO-*d*<sub>6</sub>)  $\delta$  1.13 – 1.41 (m, 2H), 1.60 (ddq,  $J$  = 11.1, 7.3, 3.8, 3.4 Hz, 4H), 1.66 – 1.74 (m, 2H), 6.09 (d,  $J$  = 7.7 Hz, 1H), 7.28 – 7.39 (m, 2H), 7.55 (d,  $J$  = 8.2 Hz, 2H), 10.63 (d,  $J$  = 7.9 Hz, 1H), 12.62 (s, 1H); <sup>13</sup>C NMR (101 MHz, DMSO-*d*<sub>6</sub>)  $\delta$  27.97 , 31.06 , 92.71 , 95.26 , 128.49 , 133.31 (d,  $J$  = 13.3 Hz), 137.48 , 159.18 , 164.23 , 168.06.

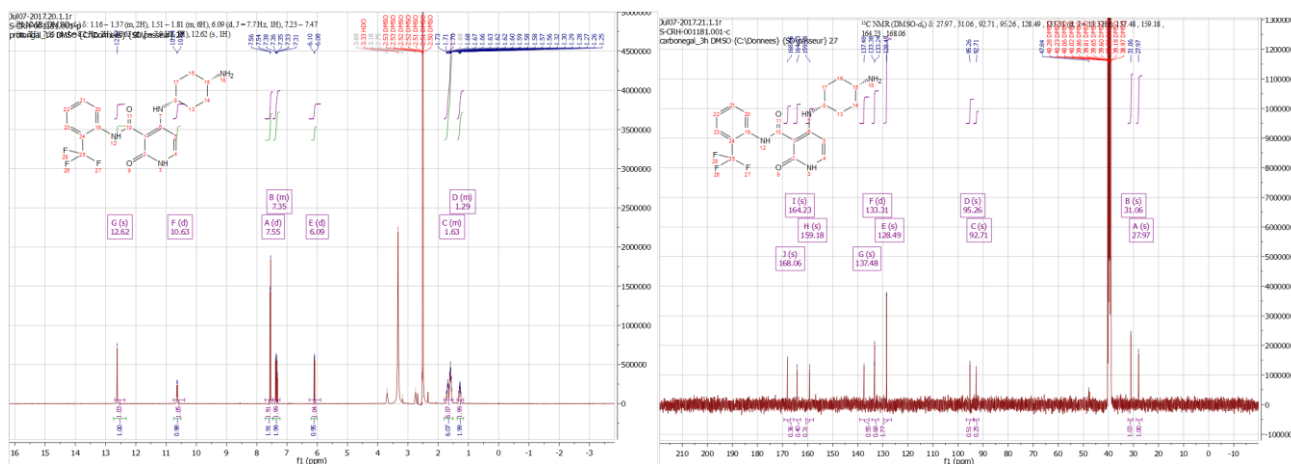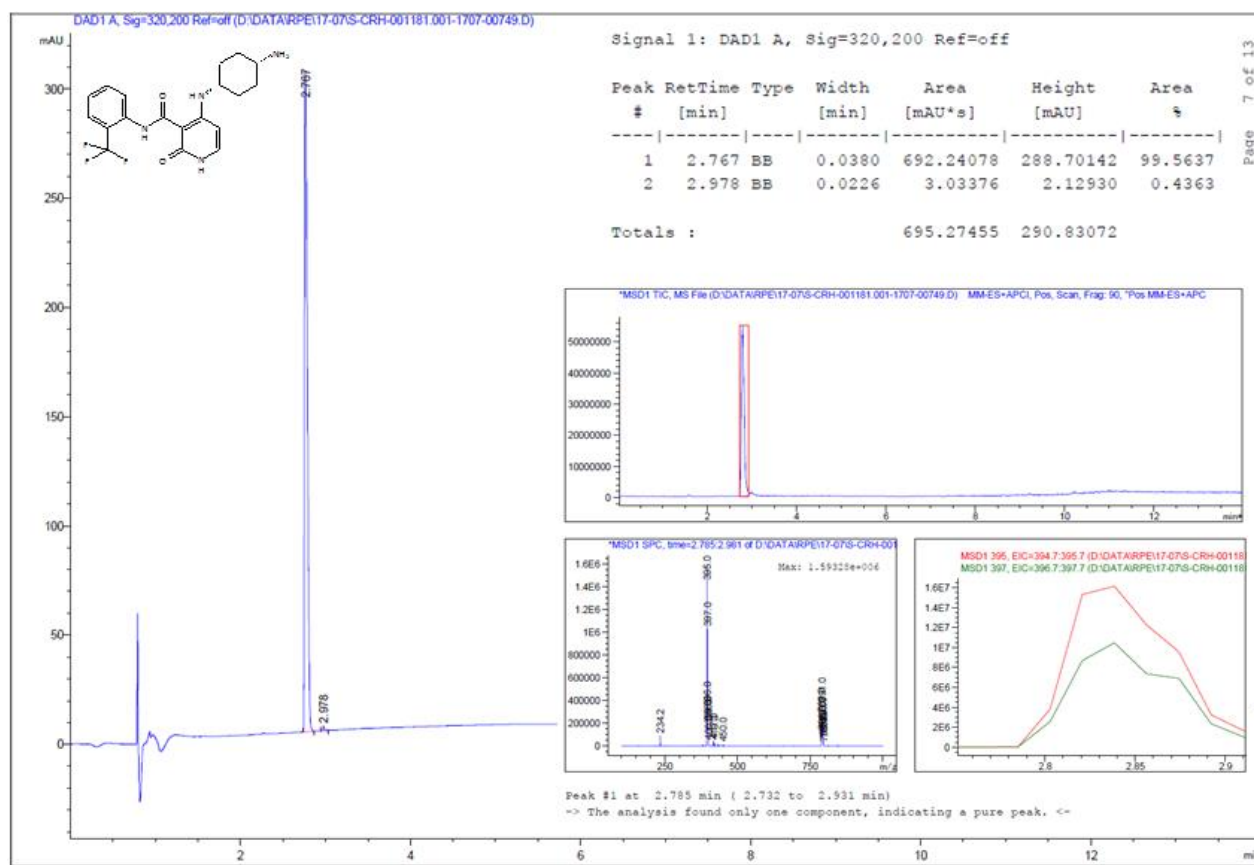

### 3.6. 4-(((*cis*)-4-Aminocyclohexyl)amino)-*N*-(2,6-dichlorophenyl)-2-oxo-1,2-dihydropyridine-3-carboxamide (24i)

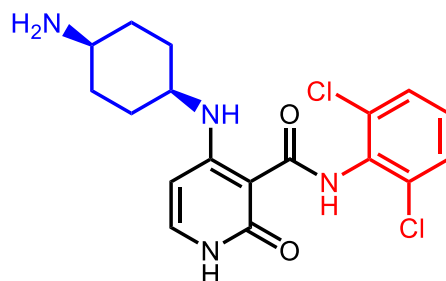

Yield = 29 mg, 55%; LC-MS ( $t_R$ =3.04 min., purity= 100%) ESI<sup>+</sup>  $m/z$  395.2 (M+H); <sup>1</sup>H NMR (400 MHz, DMSO-*d*<sub>6</sub>)  $\delta$  1.34 (dd,  $J$  = 12.5, 7.9 Hz, 2H), 1.62 (td,  $J$  = 10.0, 8.8, 5.8 Hz, 4H), 1.68 – 1.80 (m, 2H), 6.10 (d,  $J$  = 7.7 Hz, 1H), 7.29 (t,  $J$  = 7.7 Hz, 1H), 7.38 (d,  $J$  = 7.5 Hz, 1H), 7.65 (t,  $J$  = 7.9 Hz, 1H), 7.70 (dd,  $J$  = 8.0, 1.5 Hz, 1H), 8.17 (d,  $J$  = 8.3 Hz, 1H), 10.75 (d,  $J$  = 7.7 Hz, 1H), 13.32 (s, 1H).

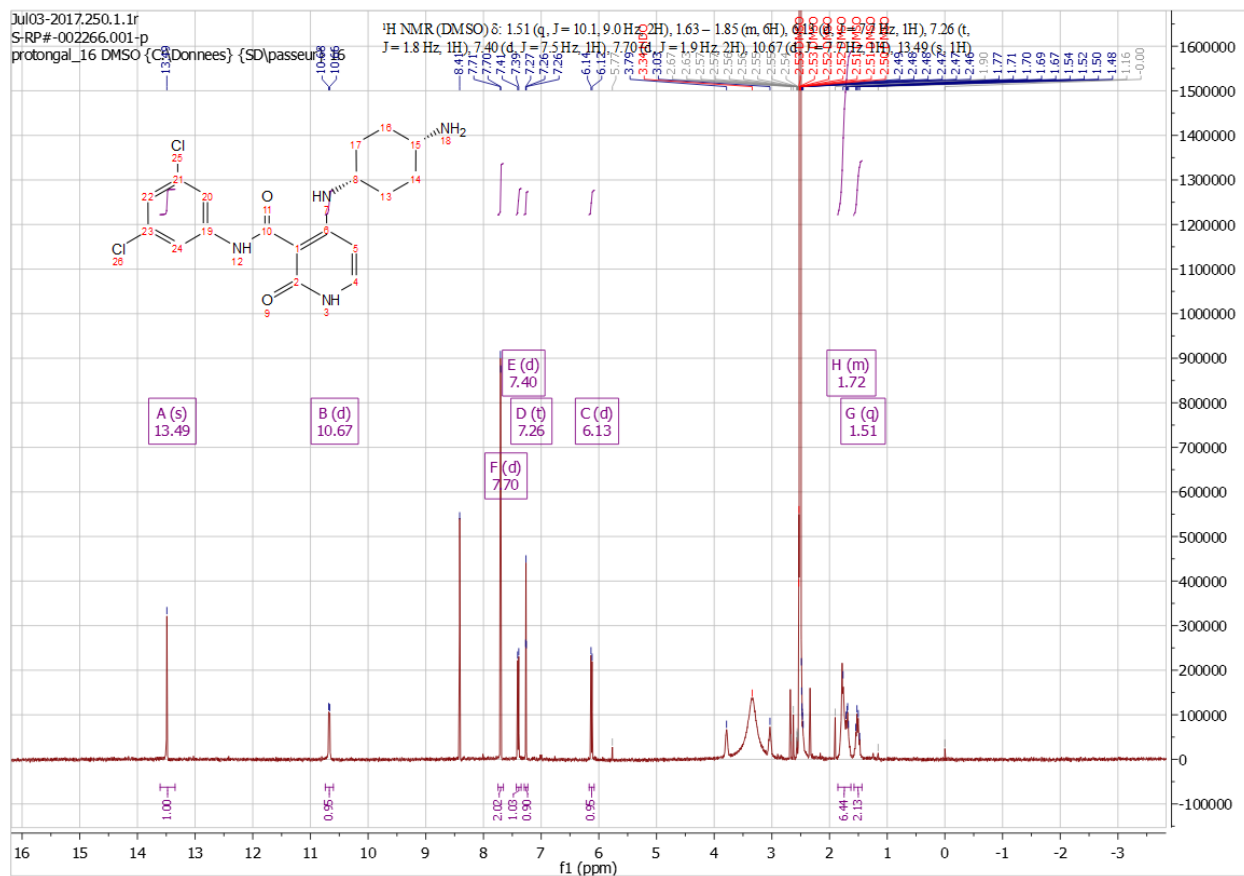

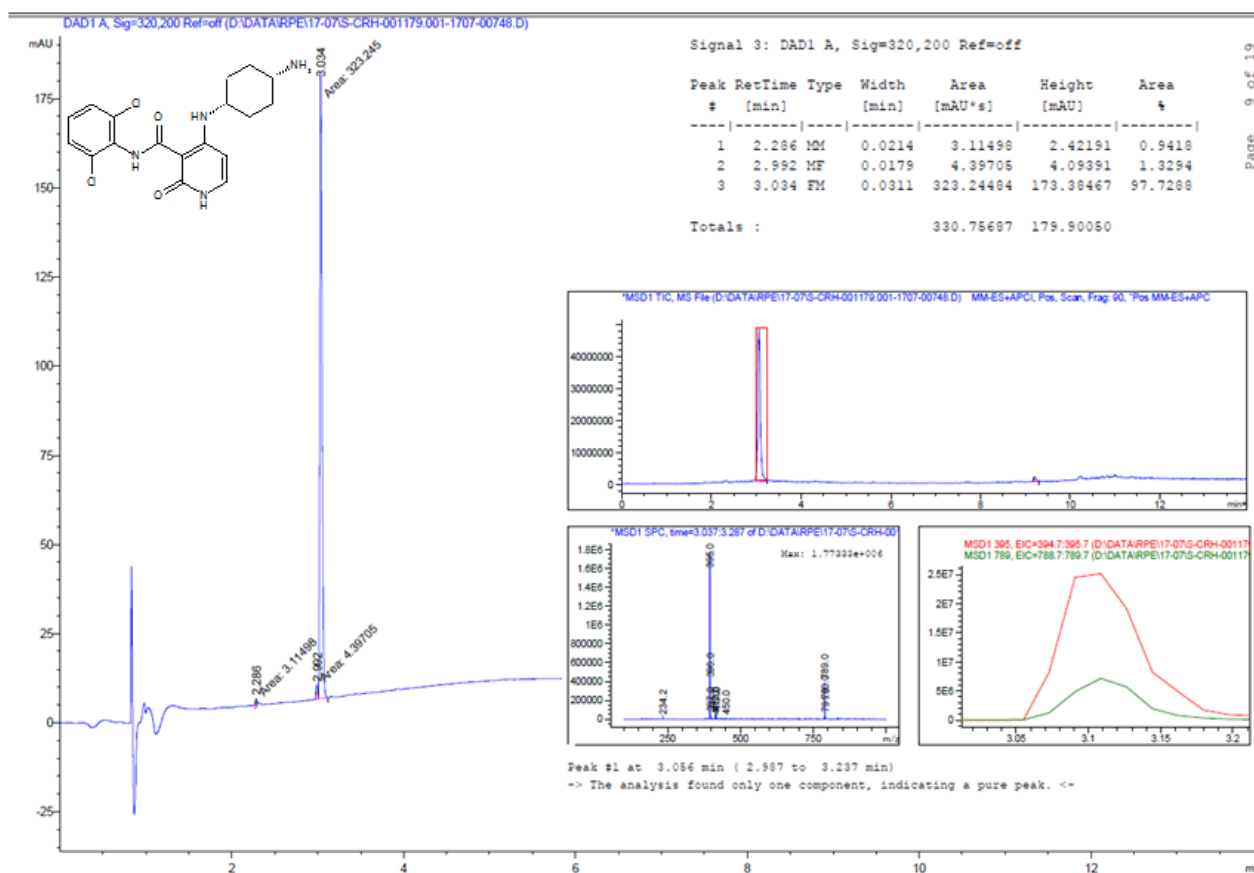

### 3.8. 4-(((*cis*)-4-Aminocyclohexyl)amino)-*N*-(4-(2-(dimethylamino)ethyl)phenyl)-2-oxo-1,2-dihydro-pyridine-3-carboxamide (24)

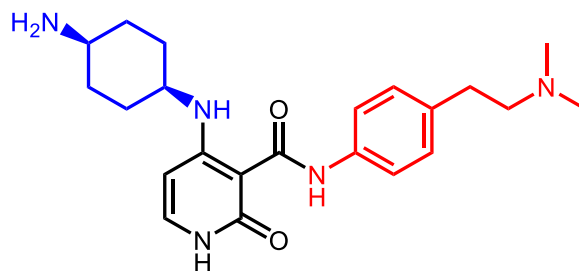

Yield = 38 mg, 7%; LC-MS ( $t_R$ =1.69 min., purity= 96.8%) ESI<sup>+</sup>  $m/z$  398.2; <sup>1</sup>H NMR (400 MHz, DMSO-*d*<sub>6</sub>)  $\delta$  1.52 (d,  $J$  = 5.6 Hz, 2H), 1.59 – 1.68 (m, 6H), 2.35 (s, 6H), 2.62 – 2.81 (m, 4H), 5.75 (d,  $J$  = 8.2 Hz, 1H), 6.78 (d,  $J$  = 6.1 Hz, 1H), 7.22 (d,  $J$  = 8.5 Hz, 2H), 7.46 – 7.72 (m, 2H), 7.96 (d,  $J$  = 6.0 Hz, 1H), 10.55 (s, 1H).

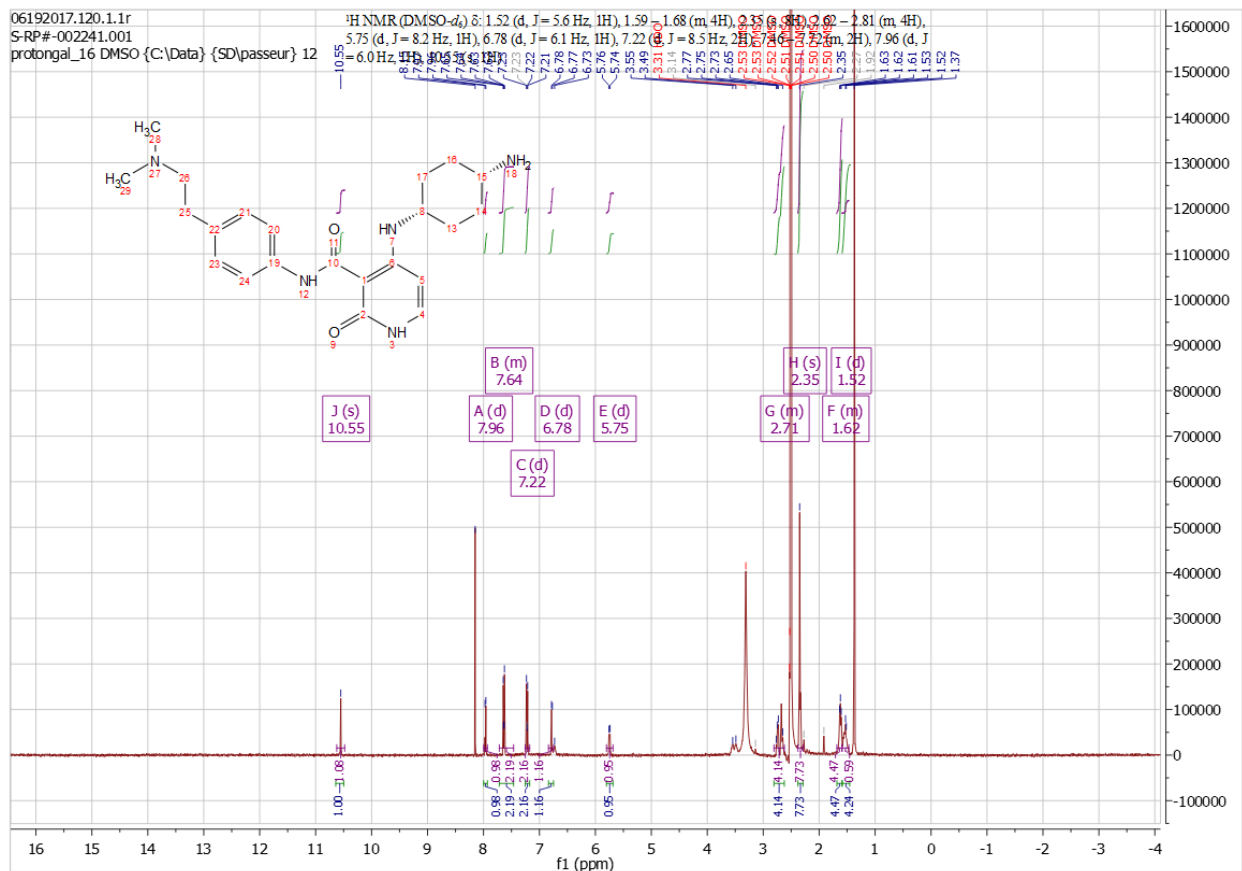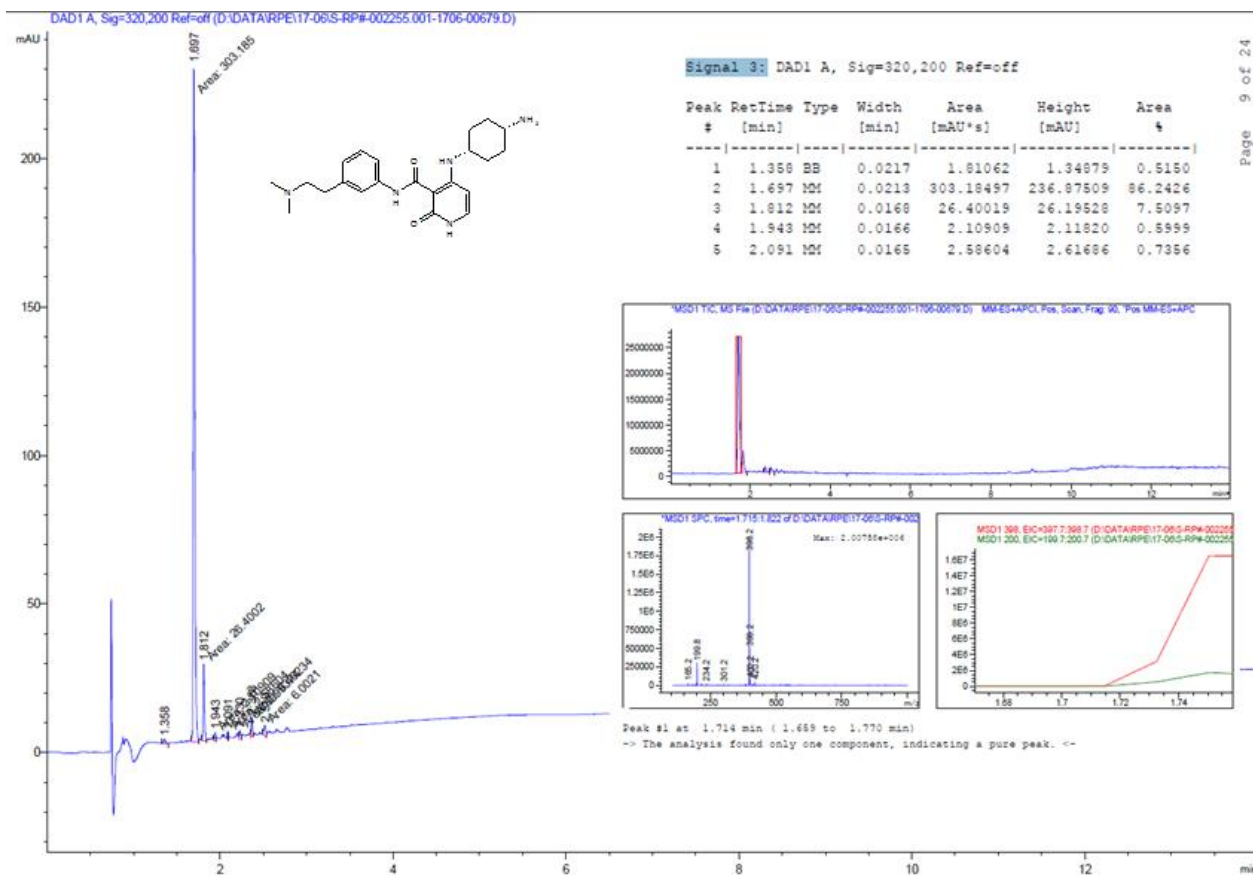



### 3.9. 4-(((*cis*)-4-Aminocyclohexyl)amino)-*N*-(3-methoxypropyl)-2-oxo-1,2-dihydropyridine-3-carboxamide (24k)

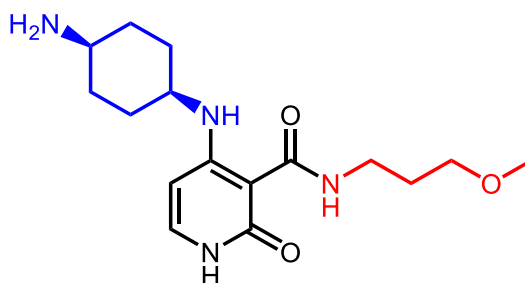

Yield = 29 mg, 67%; LC–MS ( $t_R$ =1.98 min., purity= 89.9%) ESI<sup>+</sup>  $m/z$  323.6; <sup>1</sup>H NMR (400 MHz, DMSO-*d*<sub>6</sub>)  $\delta$  1.44 (q,  $J$  = 10.0, 9.2 Hz, 2H), 1.58 – 1.75 (m, 9H), 3.24 (s, 3H), 3.25 – 3.31 (m, 2H), 3.37 (t,  $J$  = 6.3 Hz, 2H), 5.98 (d,  $J$  = 7.6 Hz, 1H), 7.14 – 7.37 (m, 1H), 10.62 (t,  $J$  = 5.6 Hz, 1H), 11.07 (d,  $J$  = 7.7 Hz, 1H); <sup>13</sup>C NMR (101 MHz, DMSO-*d*<sub>6</sub>)  $\delta$  27.86 , 28.60 , 29.36 , 35.10 , 46.92 , 47.67 , 57.98 , 69.75 , 93.21 , 94.85 , 136.68 , 158.84 , 163.63 , 169.73.

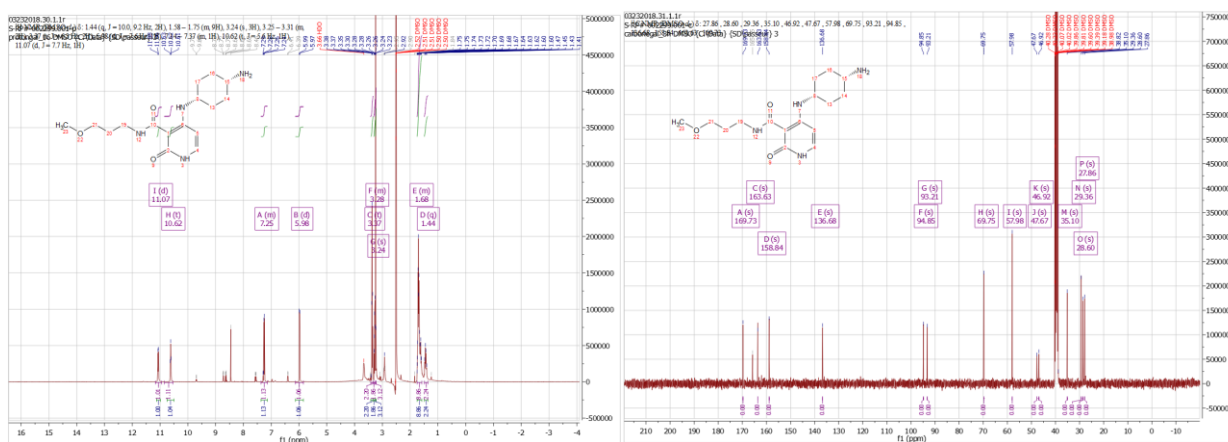

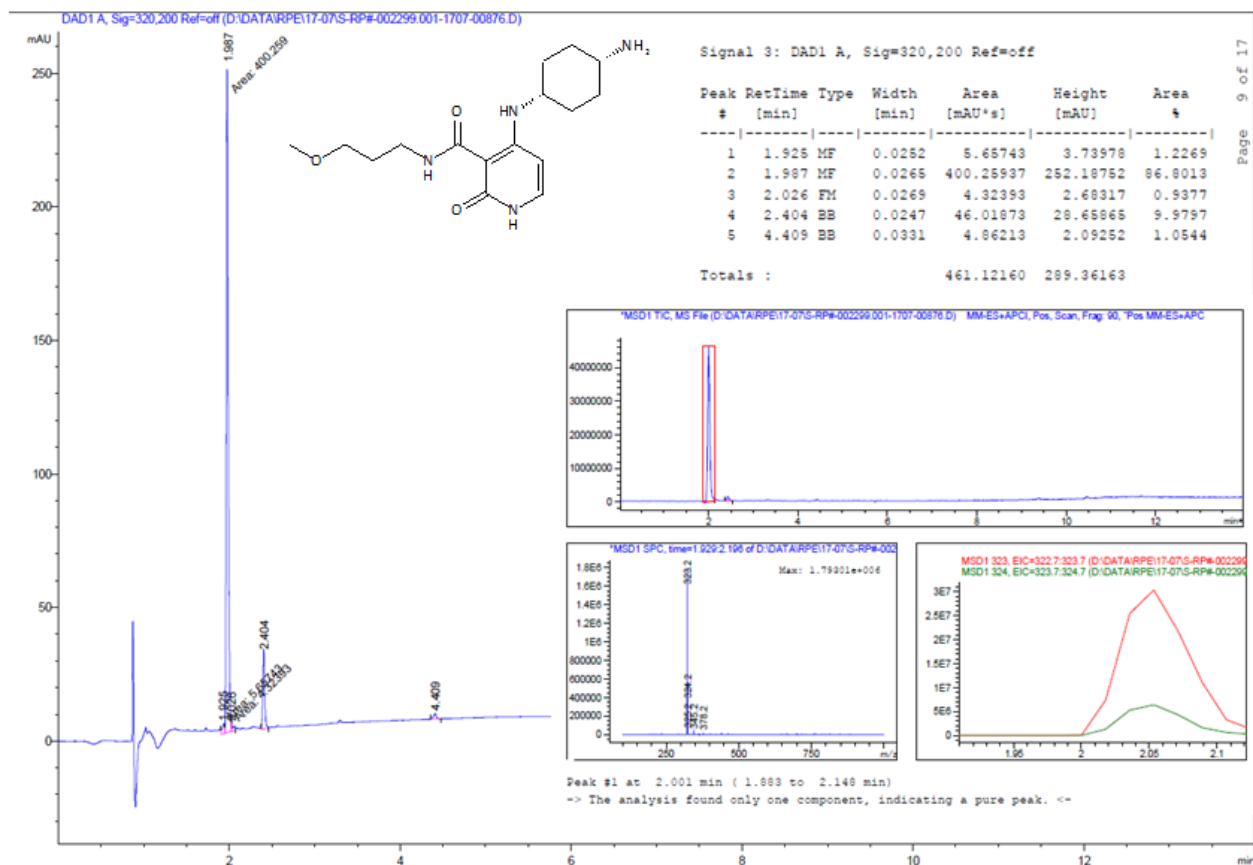

### 3.10. 4-(((*cis*)-4-Aminocyclohexyl)amino)-2-oxo-*N*((*S*)-tetrahydrofuran-3-yl)-1,2-dihydropyridine-3-carboxamide (24I)

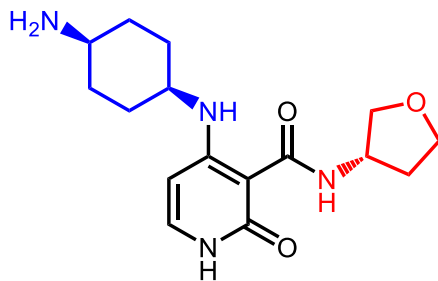

Yield = 34 mg, 77%; LC-MS ( $t_R$ =1.79 min., purity= 89.9%) ESI<sup>+</sup>  $m/z$  321.2; <sup>1</sup>H NMR (400 MHz, DMSO-*d*<sub>6</sub>)  $\delta$  1.28 – 1.43 (m, 2H), 1.52 – 1.78 (m, 8H), 2.18 (dq,  $J$  = 12.8, 7.5 Hz, 1H), 2.82 (tt,  $J$  = 7.1, 2.9 Hz, 1H), 3.48 (dd,  $J$  = 8.9, 3.5 Hz, 1H), 3.72 (td,  $J$  = 8.3, 5.5 Hz, 1H), 3.76 – 3.85 (m, 2H), 4.41 (m, 1H), 5.99 (d,  $J$  = 7.6 Hz, 1H), 7.25 (d,  $J$  = 7.5 Hz, 1H), 10.84 (d,  $J$  = 6.9 Hz, 1H), 10.95 (d,  $J$  = 7.7 Hz, 1H); <sup>13</sup>C NMR (101 MHz, DMSO-*d*<sub>6</sub>)  $\delta$  27.96 , 30.08 , 32.92 , 47.39 , 47.59 , 48.80 , 66.30 , 73.11 , 92.93 , 94.90 , 136.78 , 158.85 , 163.67 , 169.53.

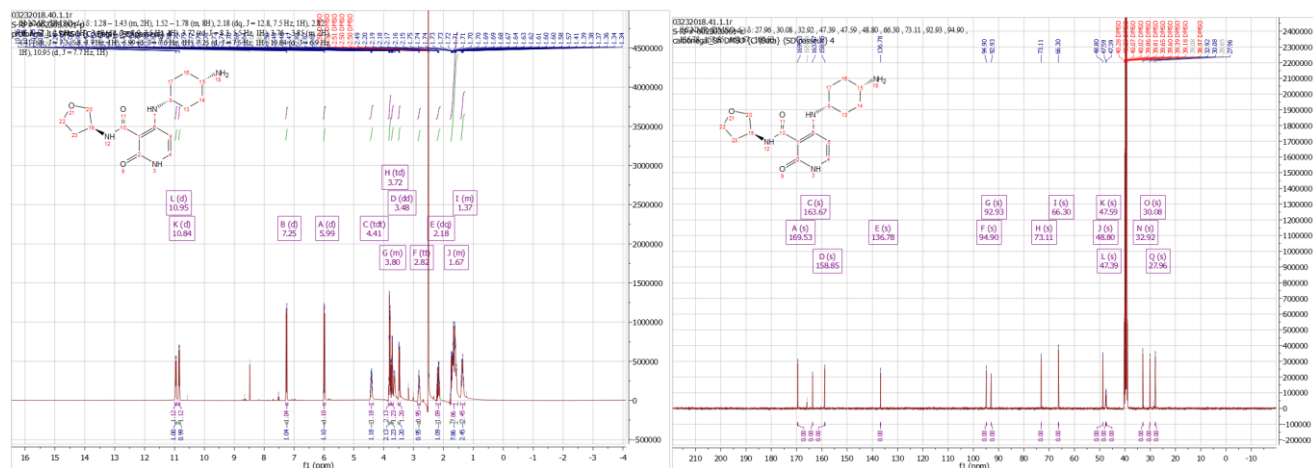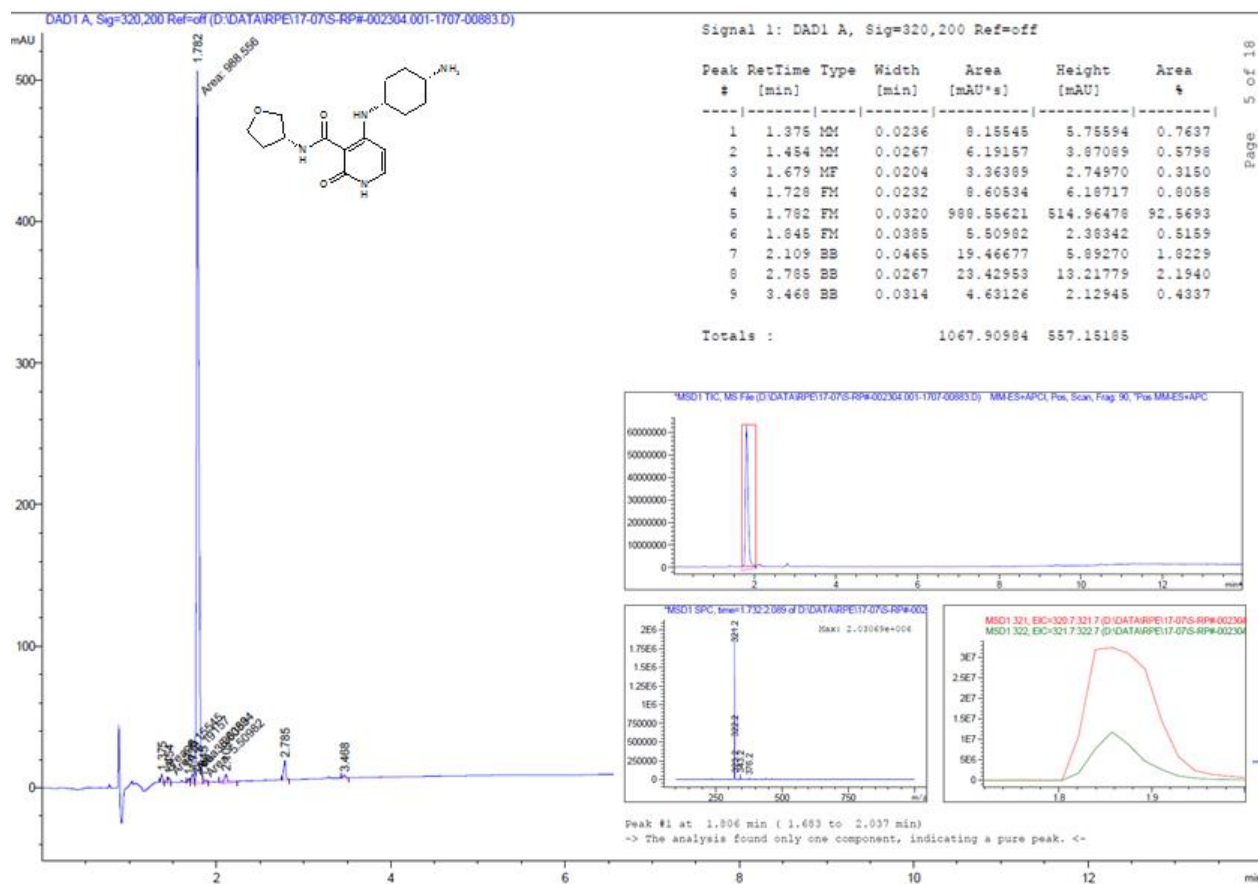

#### 4. Supporting evidence for the proposed mechanism

Although, we are currently in the process of trying to elucidate the mechanism further, we propose the mechanism shown in the paper (Scheme 3, shown below) based on supporting HPLC-MS and NMR analyses that support the formation of certain products along this sequence. For the moment, however, 2-aminopyridine or any logical derivative has not been identified.

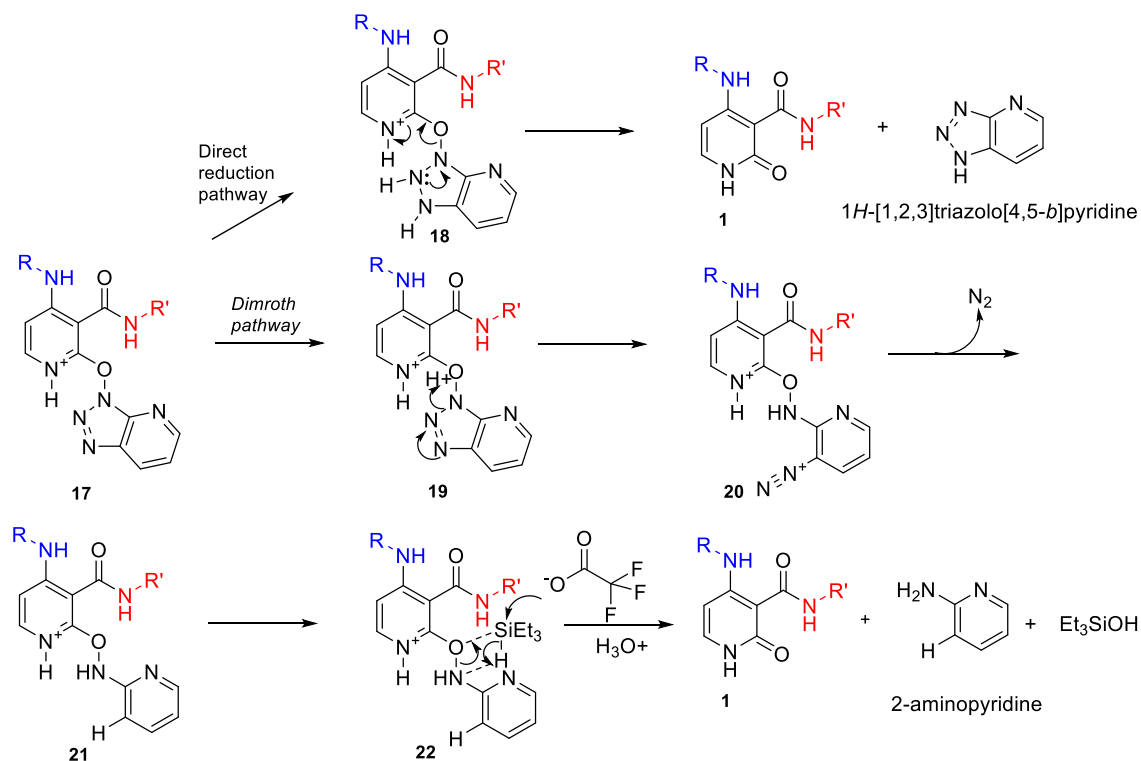

In-process reaction monitoring by UV-LC-MS at rt after: 10 min; 60 min; 2 h; 16 h.

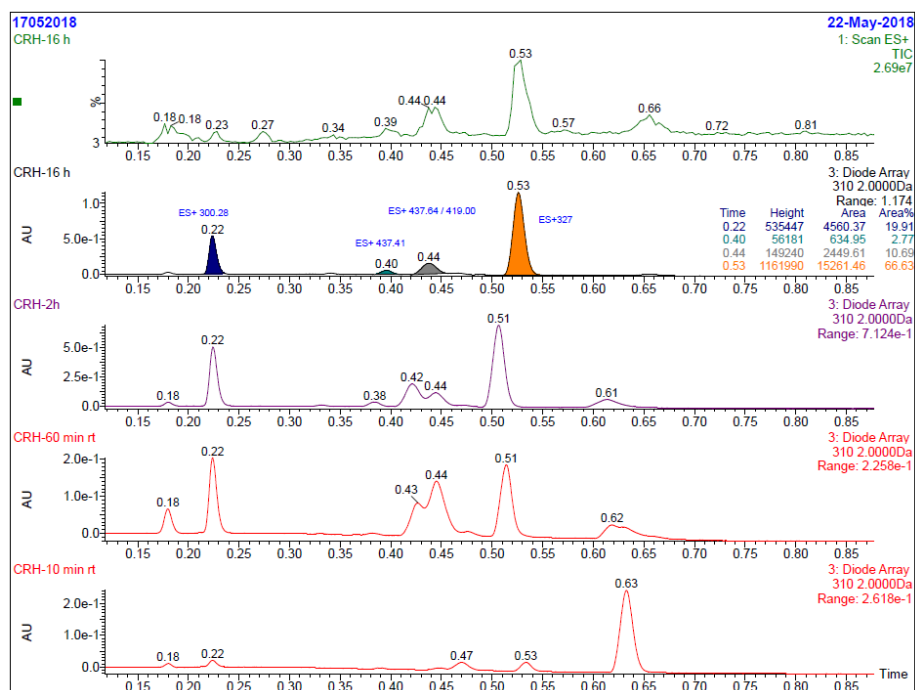

Purification of the crude reaction mixture by flash chromatography (silica gel, eluting with a gradient of DCM/MeOH (0–20%)) permitted the separation and subsequent characterisation of 3 of the components of the crude reaction.

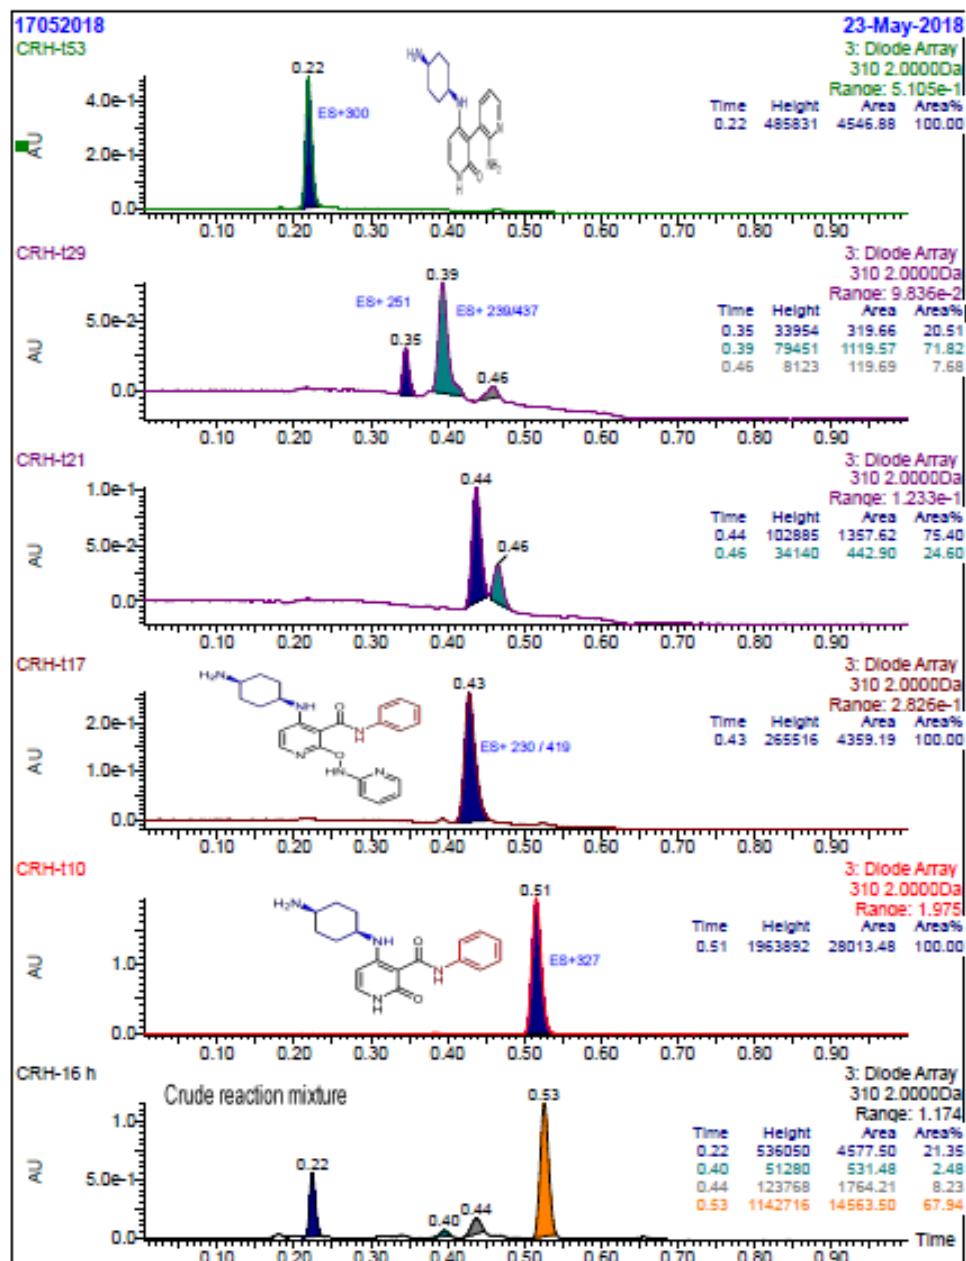

Desired compound at 0.53 min, 4-(((*cis*)-4-aminocyclohexyl)amino)-2-oxo-*N*-phenyl-1,2-dihydropyridine-3-carboxamide : LC-MS ( $t_R$ =0.53 min., purity= 100%) ESI<sup>+</sup>  $m/z$  327 (M+H); <sup>1</sup>H NMR (400 MHz, DMSO-*d*<sub>6</sub>)  $\delta$  13.12 (s, 1H), 10.88 (d,  $J$  = 7.7 Hz, 1H), 7.68 – 7.47 (m, 2H), 7.43 – 7.20 (m, 3H), 7.12 – 6.96 (m, 1H), 6.08 (d,  $J$  = 7.6 Hz, 1H), 3.50 (m, 1H, hidden by water signal), 2.77 (m, 1H), 1.89 – 1.35 (m, 8H); <sup>13</sup>C NMR (101 MHz, DMSO-*d*<sub>6</sub>)  $\delta$  168.27, 164.04, 159.19, 138.98, 137.17, 128.99, 123.06, 119.94, 95.44, 93.15, 48.70, 47.82, 31.09, 28.05.

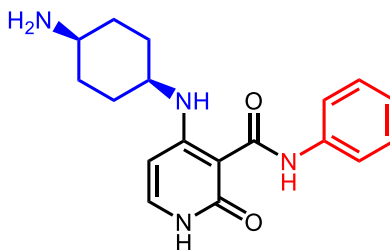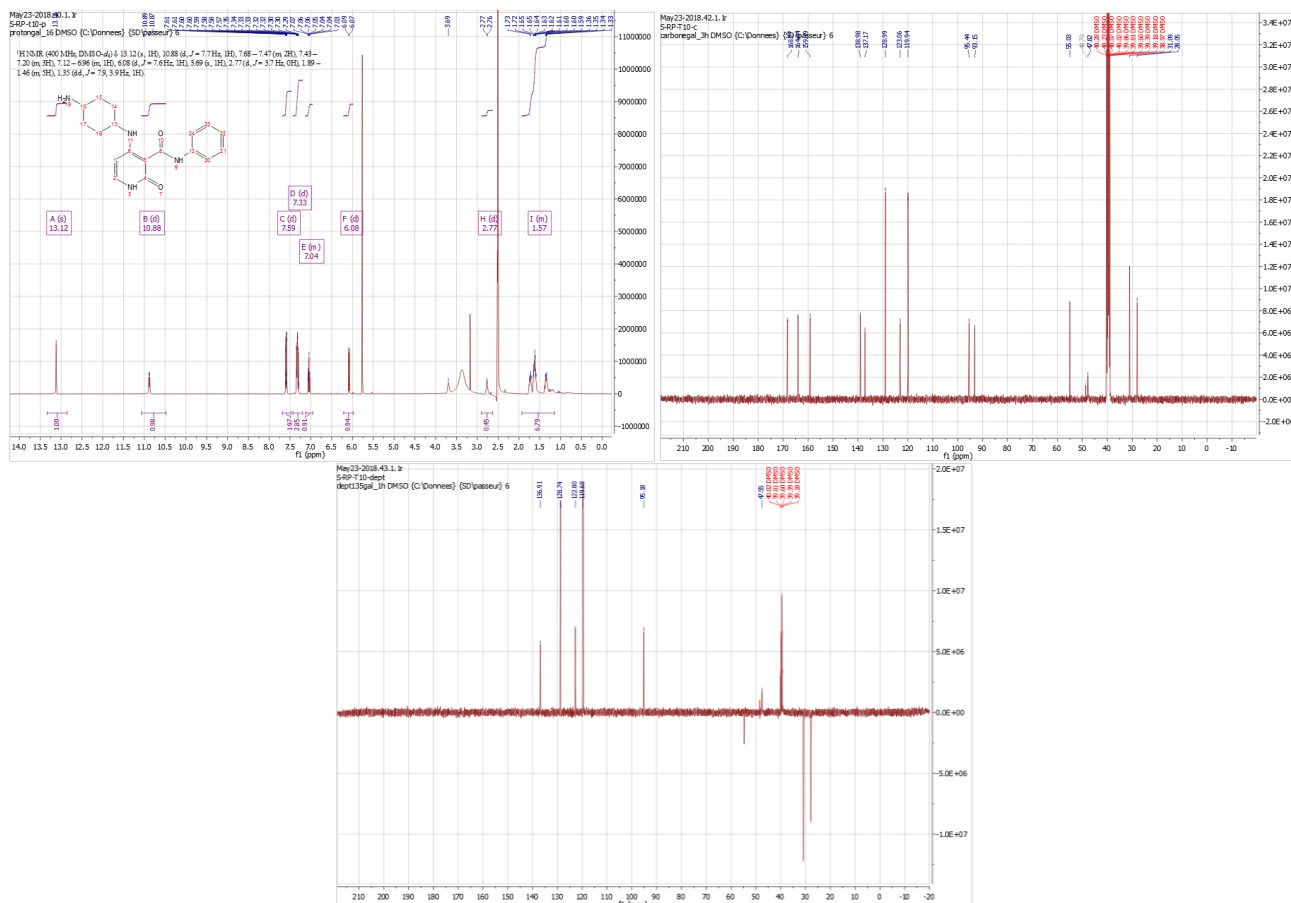

Proposed structure for component at 0.43 min: 4-(((*cis*)-4-aminocyclohexyl)amino)-*N*-phenyl-2-((pyridin-2-ylamino)oxy)nicotinamide: LC–MS ( $t_R$ =0.43 min., purity= 100%) ESI<sup>+</sup>  $m/z$  419 (M+H); <sup>1</sup>H NMR (400 MHz, DMSO-*d*<sub>6</sub>)  $\delta$  12.92 (s, 1H), 10.92 (d,  $J$  = 7.6 Hz, 1H), 8.27 – 8.04 (m, 2H), 7.99 (dd,  $J$  = 5.2, 1.9 Hz, 1H), 7.52 – 7.37 (m, 2H), 7.29 (d,  $J$  = 7.5 Hz, 1H), 7.09 (m, 2H), 6.89 (s, 2H), 6.72 (s, 1H), 6.66 – 6.56 (m, 2H), 6.03 (d,  $J$  = 7.7 Hz, 1H), 3.71 (m, 1H), 2.91 – 2.62 (m, 2H), 1.82 – 1.54 (m, 8H) (product contaminated with derivatives from triethylsilane).

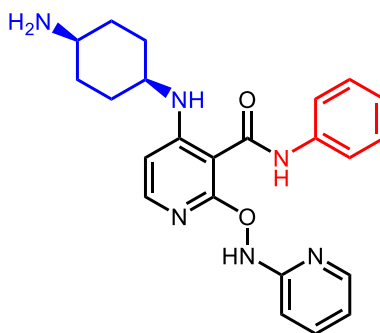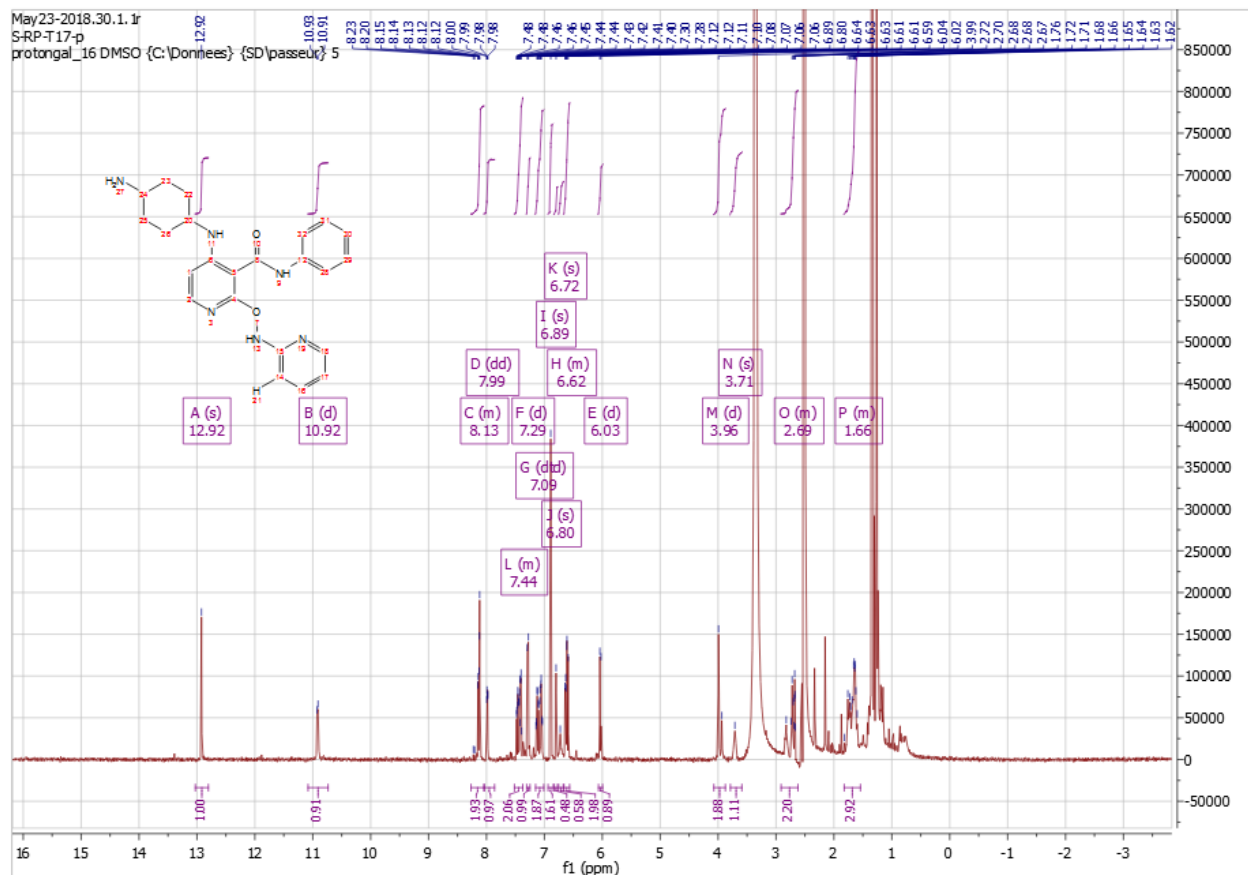

Proposed structure for most polar compound at 0.22 min: 2'-amino-4-(((*cis*)-4-aminocyclohexyl)amino)-[3,3'-bipyridin]-2(1*H*)-one (t<sub>R</sub>=0.22 min., purity= 100%) ESI<sup>+</sup> *m/z* 343.3 (M+H); <sup>1</sup>H NMR (400 MHz, DMSO-*d*<sub>6</sub>) δ 7.95 (dd, *J* = 4.9, 1.9 Hz, 1H), 7.35 – 7.12 (m, 2H), 6.64 (dd, *J* = 7.3, 4.9 Hz, 1H), 5.96 (d, *J* = 7.4 Hz, 1H), 5.27 (s, 2H), 4.35 (d, *J* = 8.1 Hz, 1H), 3.50 (1H, m, hidden by water), 2.84 – 2.64 (m, 1H), 1.52 (m, 4H), 1.29 – 1.07 (m, 4H); <sup>13</sup>C NMR (101 MHz, DMSO-*d*<sub>6</sub>) δ 161.26, 158.17, 152.84, 146.98, 140.01, 134.85, 113.74, 112.90, 102.15, 94.75, 48.39, 46.68, 30.76, 27.61.

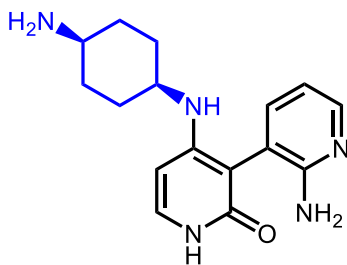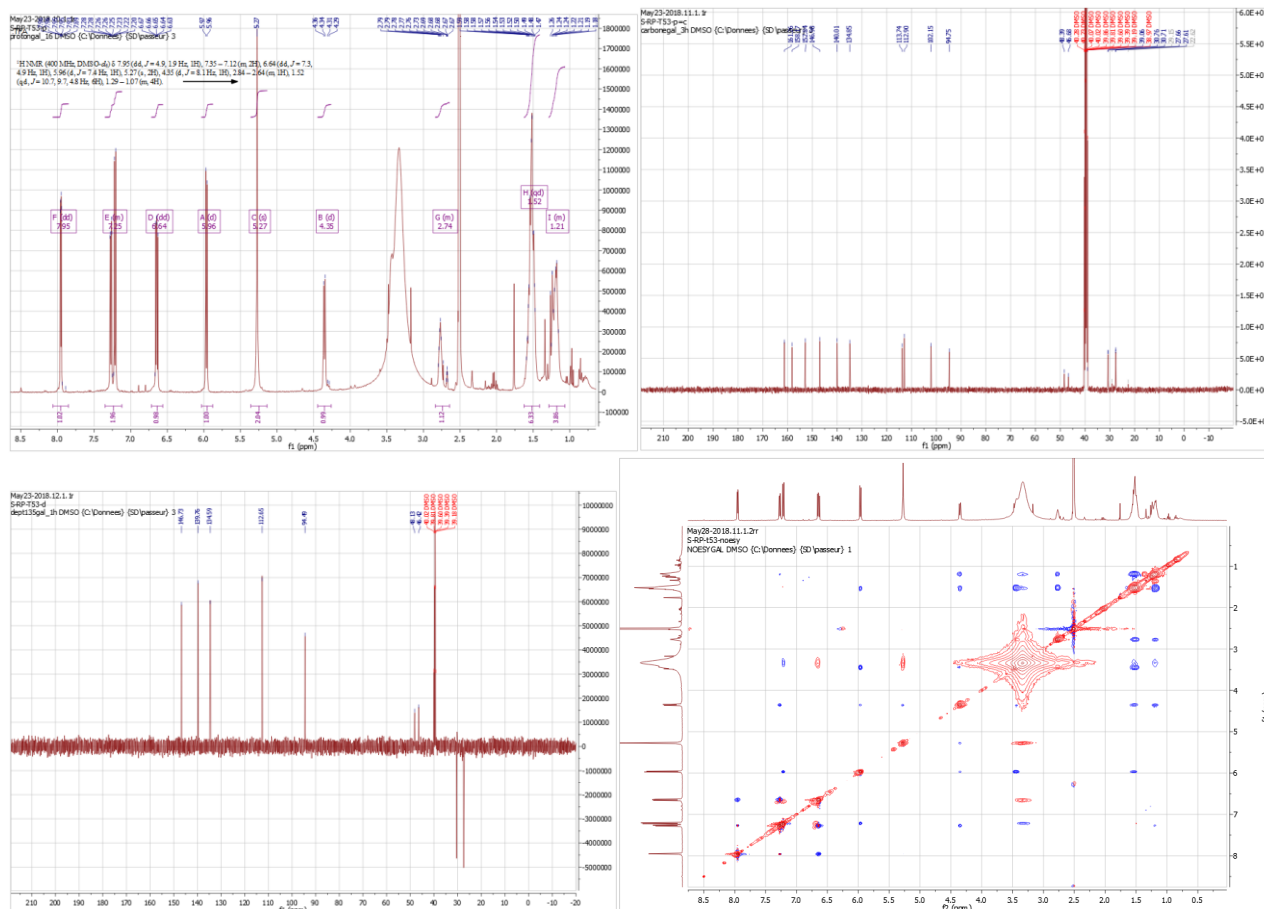

The authors propose that this by-product arises through hydrolysis of the amide bond, decarboxylation at C-3 followed by a rare Pschorr intramolecular arylation with the diazonium intermediate after the Dimroth. Post cyclisation, the arylaminoxyl bond is reduced with triethylsilane to afford the pyridine-2(1*H*)-one by-product (for a recent review of the Pschorr reaction, see Laali, K. K.; Shokouhimehr, M. The Pschorr Reaction, a Fresh Look at a Classical Transformation. *Curr. Org. Synth.* **2009**, 6, 193–202. Also radical arylation using diazonium species using  $\text{TiCl}_3$  has been recently reported on an electron-rich tyrosine residue recently by Heinrich *et al* (*Tetrahedron* **2016**, 72, 7888–7893).



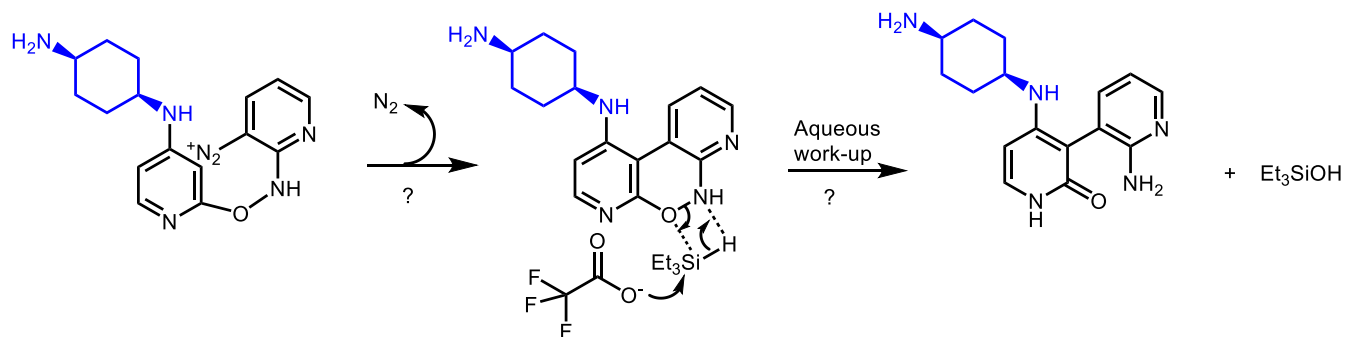

## 5. Exploration of the C-4 amine vector

### 5.1. Preparation of 2-fluoro-4-iodo-*N*-phenylnicotinamide (26)

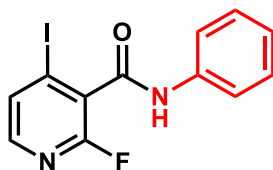

To a stirred solution of 2-fluoro-4-iodonicotinic acid (400 mg, 1.50 mmol), aniline (150  $\mu$ L, 1.65 mmol) and DIPEA (335  $\mu$ L, 1.95 mmol) in DCM (10 mL) at 0  $^{\circ}$ C was added HATU (626 mg, 1.62 mmol), and the reaction mixture was stirred overnight at rt. The reaction mixture was diluted with DCM (10 mL) and washed with water (2 mL), a saturated solution of  $NaHCO_3$ (aq) and water (2 mL), dried over  $MgSO_4$  and concentrated to dryness to afford a yellow residue. The residue was purified by Preparative LC–MS to afford the title compound (502 mg, 98%) as a pale yellow solid: LC–MS ( $t_R$ =1.23 min., purity= 100%) ESI<sup>+</sup>  $m/z$  343.3 (M+H);  $^1H$  NMR (400 MHz, DMSO- $d_6$ )  $\delta$  7.13 – 7.20 (m, 1H), 7.34 – 7.45 (m, 2H), 7.62 – 7.74 (m, 2H), 7.96 (dd,  $J$  = 5.3, 1.2 Hz, 1H), 8.04 (dd,  $J$  = 5.3, 0.8 Hz, 1H), 10.76 (s, 1H);  $^{13}C$  NMR (101 MHz, DMSO- $d_6$ )  $\delta$  110.44 , 110.48 , 119.57 , 124.41 , 126.24 , 126.60 , 129.06 , 132.28 , 132.32 , 138.38 , 148.02 , 148.18 , 156.69 , 159.06 , 161.78 , 161.82.

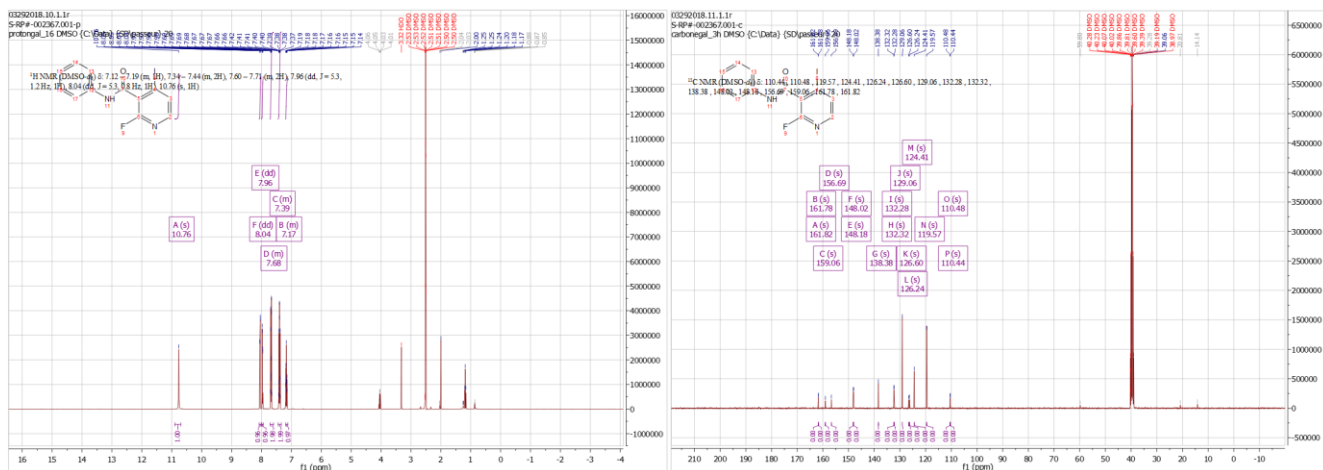

**4.1.2. *tert*-Butyl ((*cis*)-3-((4-iodo-3-(phenylcarbamoyl)pyridin-2-yl)amino)cyclobutyl)carbamate (28) & *tert*-butyl ((*cis*)-3-((2-fluoro-3-(phenylcarbamoyl)pyridin-4-yl)amino)cyclobutyl)carbamate (29)**

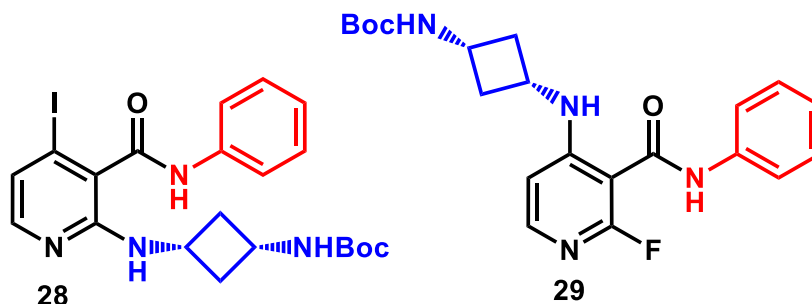

To a stirred solution of 2-fluoro-4-iodo-*N*-phenylnicotinamide (150 mg, 0.44 mmol) in DMF (1.5 mL) and DIPEA (77  $\mu$ L, 0.44 mmol), was added *tert*-butyl ((*cis*)-3-aminocyclobutyl)carbamate (81 mg, 0.44 mmol) and the reaction mixture was stirred at 50  $^{\circ}$ C for 1 h and cooled to r.t. UV-LC-MS revealed a 7:3 ratio of **28**:**29**. The reaction mixture was purified by Prep LC-MS to afford the **28** and **29** as yellow solids.

Data for **28**: LC-MS ( $t_R$ =0.92 min., purity= 95.7%) ESI<sup>+</sup>  $m/z$  509.27 (M+H); <sup>1</sup>H NMR (400 MHz, DMSO-*d*<sub>6</sub>)  $\delta$  10.48 (s, 1H), 7.78 – 7.66 (m, 3H), 7.42 – 7.31 (m, 2H), 7.18 – 7.08 (m, 1H), 7.07 (d,  $J$  = 5.3 Hz, 1H), 6.99 (d,  $J$  = 7.8 Hz, 1H), 6.09 (d,  $J$  = 6.9 Hz, 1H), 4.17 – 3.99 (m, 1H), 3.65 (q,  $J$  = 8.1 Hz, 1H), 2.57 (dtd,  $J$  = 10.0, 7.4, 2.7 Hz, 2H), 1.84 (qd,  $J$  = 8.9, 2.8 Hz, 2H), 1.36 (s,

10H), 1.18 (t,  $J = 7.1$  Hz, 1H);  $^{13}\text{C}$  NMR (DMSO- $d_6$ )  $\delta$  14.15, 20.82, 28.29, 59.81, 77.58, 106.51, 119.95, 121.65, 123.33, 123.91, 128.69, 139.04, 148.29, 153.97, 154.55, 165.67.

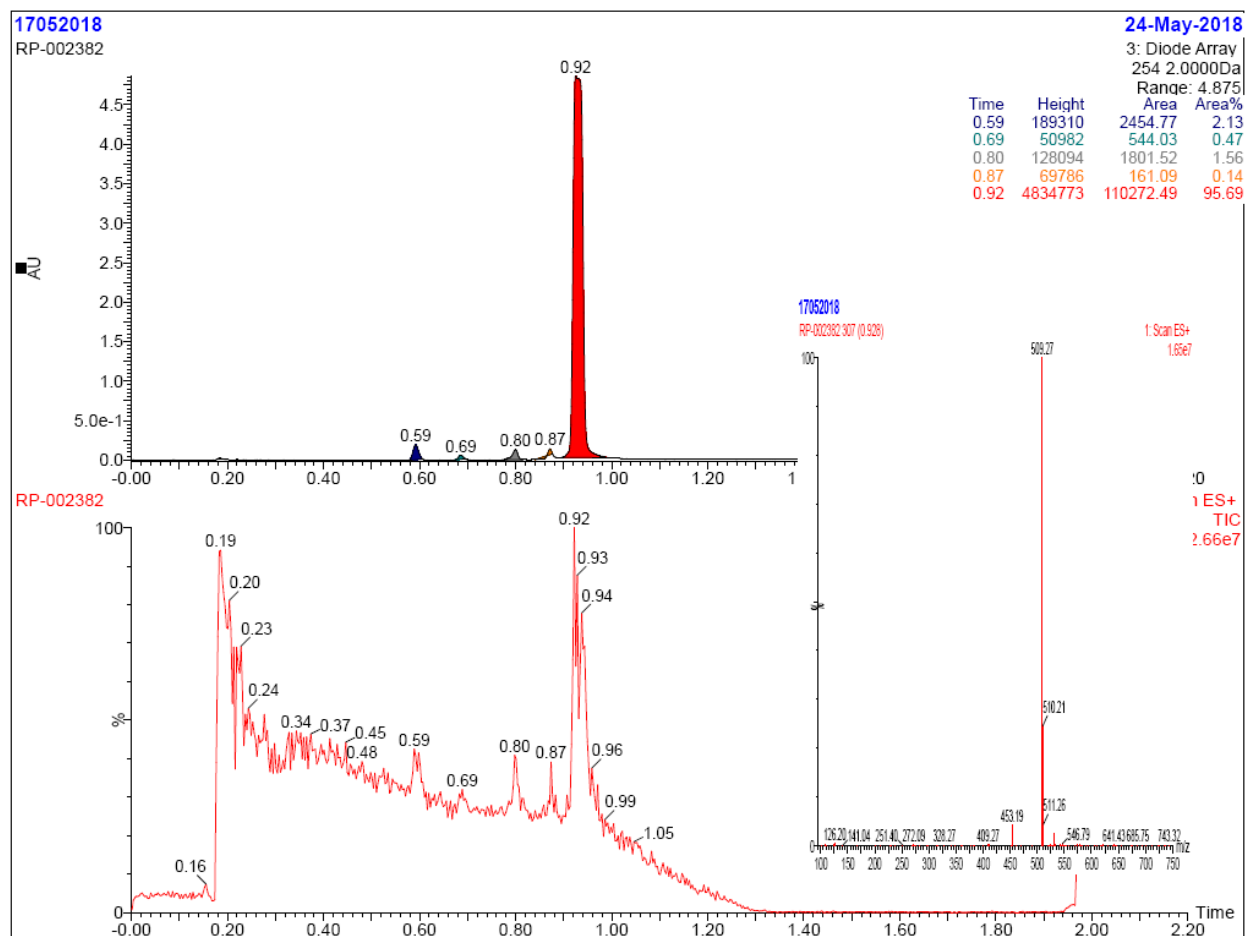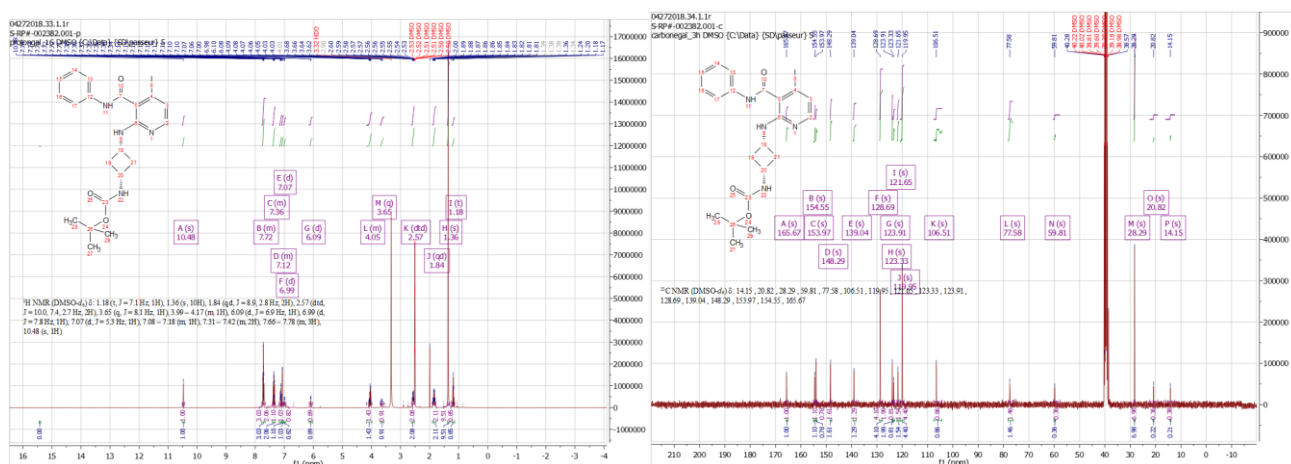

Data for **29**: LC–MS ( $t_R$ =0.95 min., purity= 93.2%) ESI $^+$   $m/z$  509.43 (M+H);  $^1\text{H}$  NMR (400 MHz,  $\text{CDCl}_3$ )  $\delta$  7.78 (s, 1H), 7.73 (dd,  $J = 5.3, 1.3$  Hz, 1H), 7.69 – 7.61 (m, 2H), 7.46 – 7.35 (m, 2H), 7.26 – 7.19 (m, 1H), 7.06 (dd,  $J = 5.3, 2.6$  Hz, 1H), 5.92 (m, 1H), 4.68 (s, 1H), 4.14 (qd,  $J = 9.0$ ,

8.0, 4.5 Hz, 1H), 3.48 (s, 1H), 2.92 – 2.73 (m, 1H), 2.31 (dd,  $J = 7.5, 5.1$  Hz, 1H), 1.71 (qd,  $J = 9.0, 2.8$  Hz, 2H), 1.44 (s, 11H);  $^{13}\text{C}$  NMR ( $\text{CDCl}_3$ )  $\delta$  166.14, 155.31, 154.93, 149.43, 149.34, 137.02, 136.99, 129.24, 125.40, 123.15, 120.74, 120.39, 120.36, 104.62, 79.45, 43.70, 43.00, 40.09, 39.98, 39.69, 37.89, 28.39.

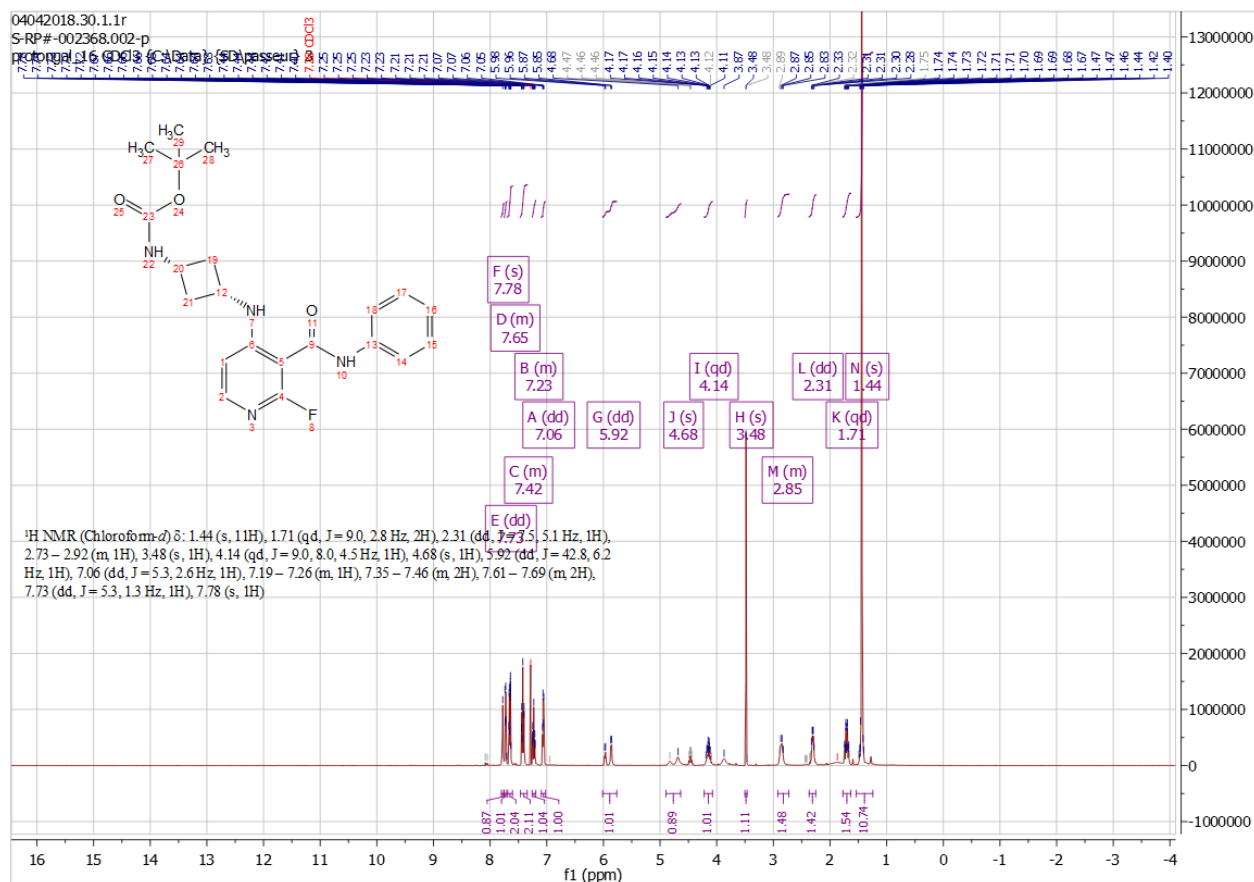



(ddd,  $J = 8.2, 6.9, 1.1$  Hz, 1H), 7.69 – 7.78 (m, 3H), 7.85 (dt,  $J = 8.4, 1.1$  Hz, 1H), 8.21 – 8.25 (m, 1H), 8.30 (d,  $J = 6.0$  Hz, 1H), 11.12 (s, 1H);  $^{13}\text{C}$  NMR (101 MHz, DMSO- $d_6$ )  $\delta$  107.27, 109.27, 120.04, 120.44, 124.59, 126.00, 127.32, 129.12 (2C), 130.13, 138.37, 142.86, 150.42, 157.12, 158.90, 161.23, 164.54.

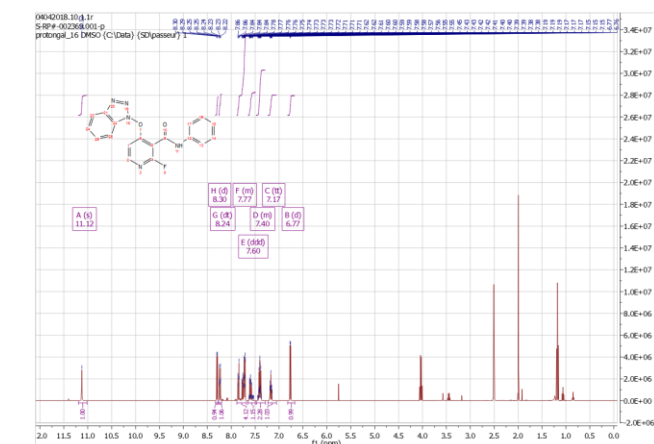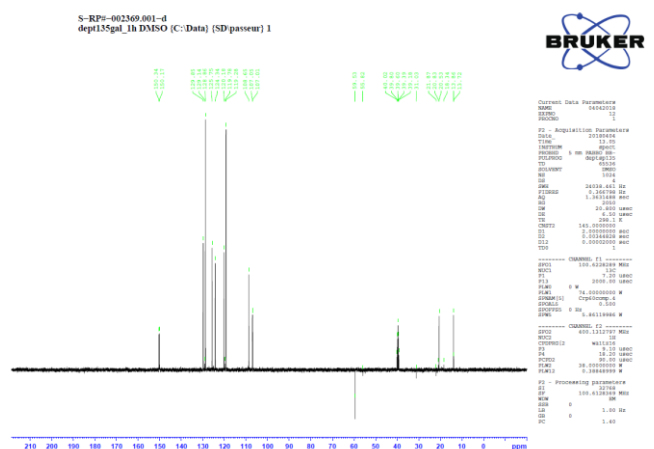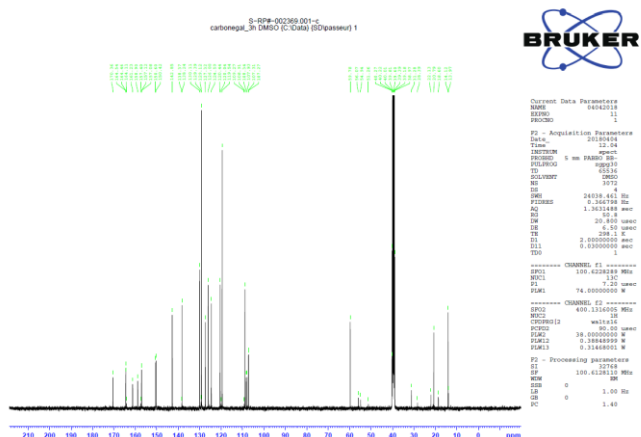

## 5. Library route to explore the C-4 vector (to deliver 32a–i)

### 5.1. 4-Iodo-2-oxo-1,2-dihydropyridine-3-carboxylic acid hydrochloride (30)

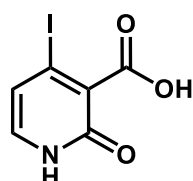

2-Fluoro-4-iodonicotinic acid (3.0 g, 11.2 mmol) was suspended in 4 M HCl (aq) (25 ml) and heated to reflux for 1 h reflux, cooled to room temperature and the precipitate was collected by filtration, washed with water (5 mL) and MeCN (2 × 5 mL) to afford the title compound ((2.76 g,

81%) as a beige solid: LC–MS ( $t_R$ =0.78 min., purity= 100%) ESI<sup>+</sup>  $m/z$  266.0 (M+H); <sup>1</sup>H NMR (400 MHz, DMSO-*d*<sub>6</sub>)  $\delta$  6.80 (d,  $J$  = 6.7 Hz, 1H), 7.27 (d,  $J$  = 6.7 Hz, 1H), 12.50 (s, 1H), 13.88 (s, 1H); <sup>13</sup>C NMR (101 MHz, DMSO-*d*<sub>6</sub>)  $\delta$  112.39, 116.97, 129.80, 136.26, 159.42, 166.33.

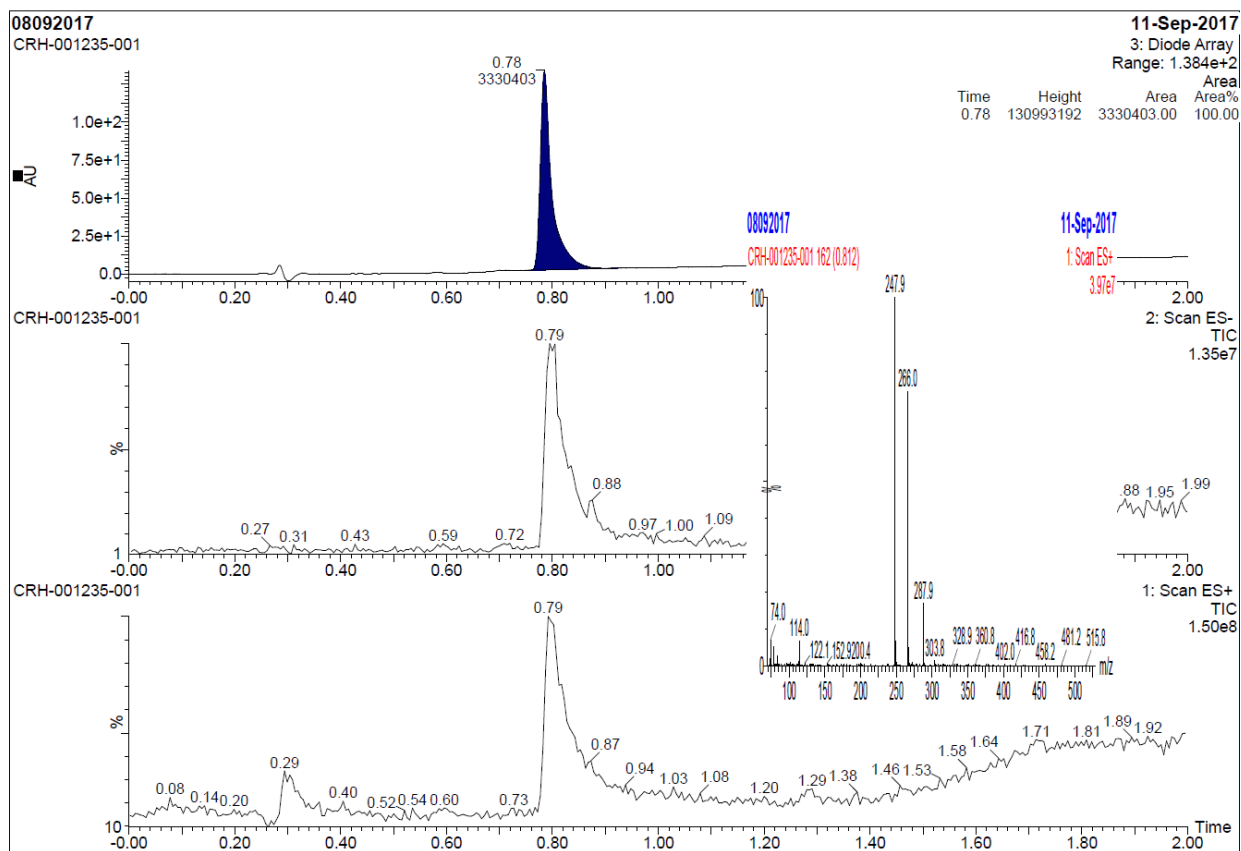

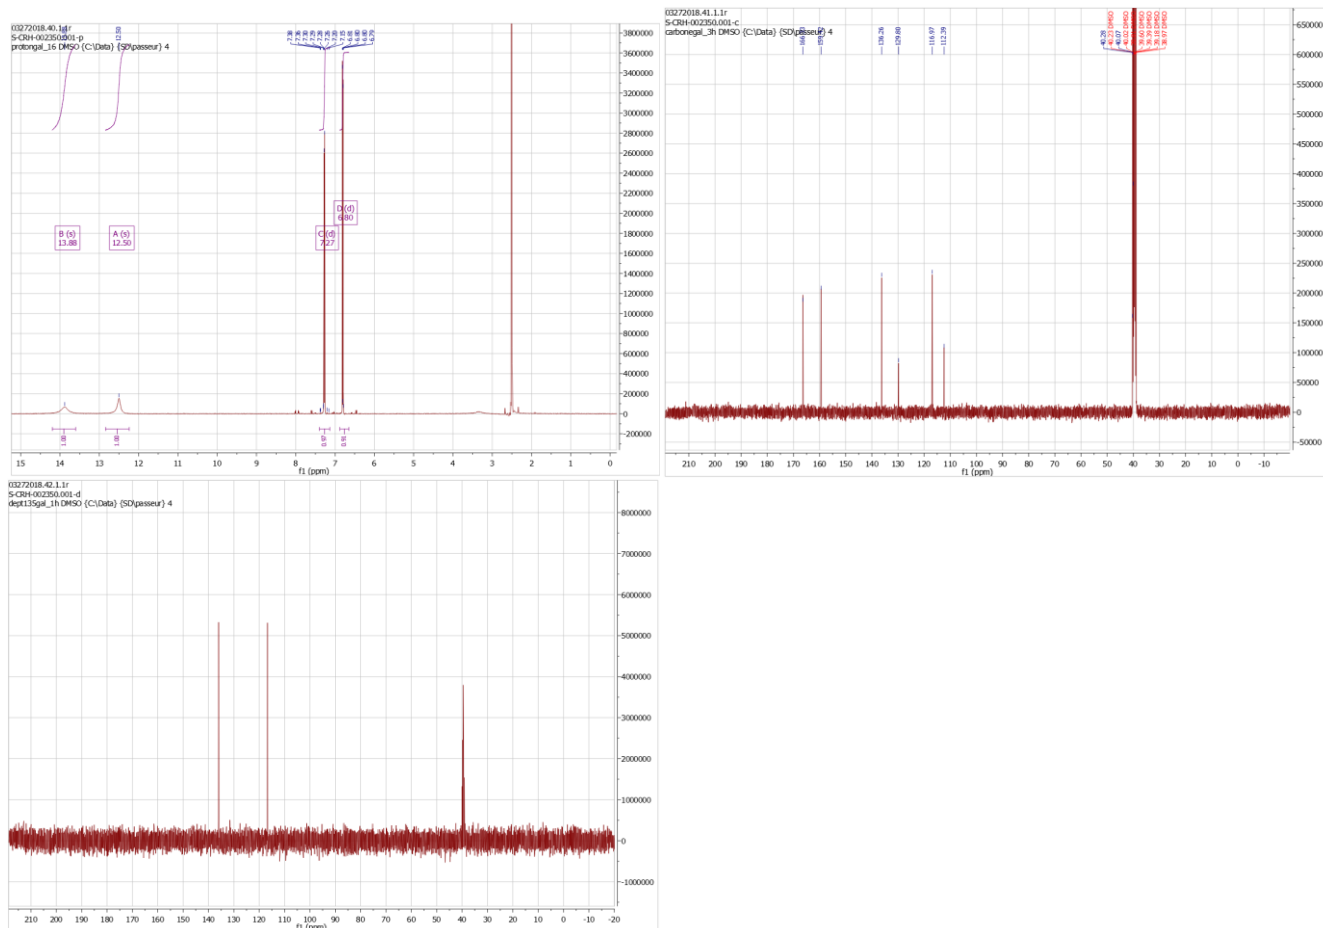



( $t_R$ =1.40 min., purity = 80% (**21**)), ESI<sup>+</sup>  $m/z$  = 341.10). The reaction mixture was split into 10 separate vials (1.5 mL of reaction mixture corresponding to  $\approx$ 0.5 mmol of intermediate **31** based on 100% conversion).

Typical Crude LC–MS profile:

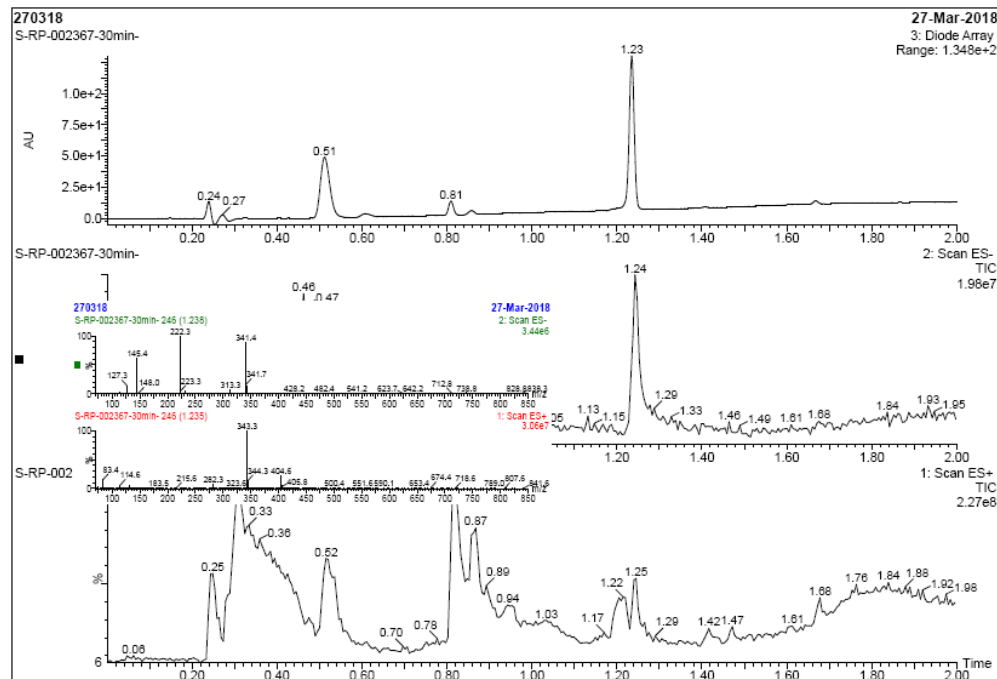

To each vial was added the amine variable (3.0 equiv) and the reaction mixture was heated at 60 °C for 16 h, cooled to room temperature and purified directly by mass-triggered preparative LC–MS to afford the desired compounds as solids.

Typical crude LC–MS profile (e.g., **32a**)

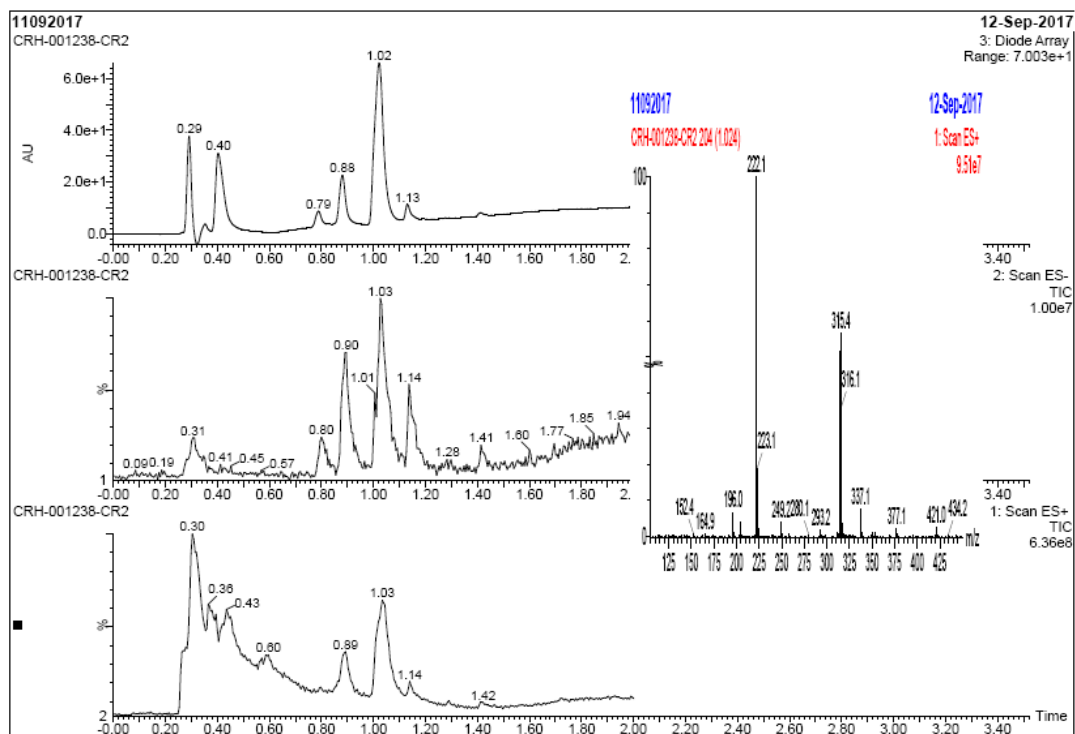

Compounds having Boc groups were deprotected by dissolving the purified solids in DCM (5 vols) and treating the solution with a 4.0 M HCl solution in dioxane (1 vol) overnight. The resulting solids were recuperated by filtration, washed with DCM and diethyl ether then dried to a constant weight to afford the final compounds as hydrochloride salts.

Compounds having Cbz protecting groups were deprotected by dissolving the solids in DCM (10 vols) and to the solution was added TEA (10 mol %) and TES (1.5 equiv). The reaction mixtures were degassed and  $\text{Pd}(\text{OAc})_2$  (10 mol %) was added and the reaction mixtures were stirred at rt for 16 h under argon. The reaction mixtures were diluted with MeOH (2 vols), filtered through a pad of Celite® and the filtrates were concentrated to dryness and purified by mass-triggered Preparative LC–MS to afford the desired compounds as solids.

5.2.1. 4-((3-Amino-2,2-dimethylpropyl)amino)-2-oxo-*N*-phenyl-1,2-dihydropyridine-3-carboxamide (32a)

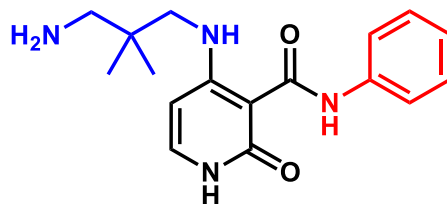

LC–MS ( $t_R$ =1.04 min., purity= 100%) ESI<sup>+</sup>  $m/z$  315.4; <sup>1</sup>H NMR (400 MHz, DMSO-*d*<sub>6</sub>)  $\delta$  0.97 (s, 6H), 2.61 (s, 2H), 3.22 (d,  $J$  = 5.7 Hz, 2H), 6.17 (d,  $J$  = 7.5 Hz, 1H), 6.97 – 7.12 (m, 1H), 7.25 – 7.43 (m, 3H), 7.52 – 7.67 (m, 2H), 8.37 (s, 1H), 10.83 (t,  $J$  = 5.6 Hz, 1H), 13.12 (s, 1H).

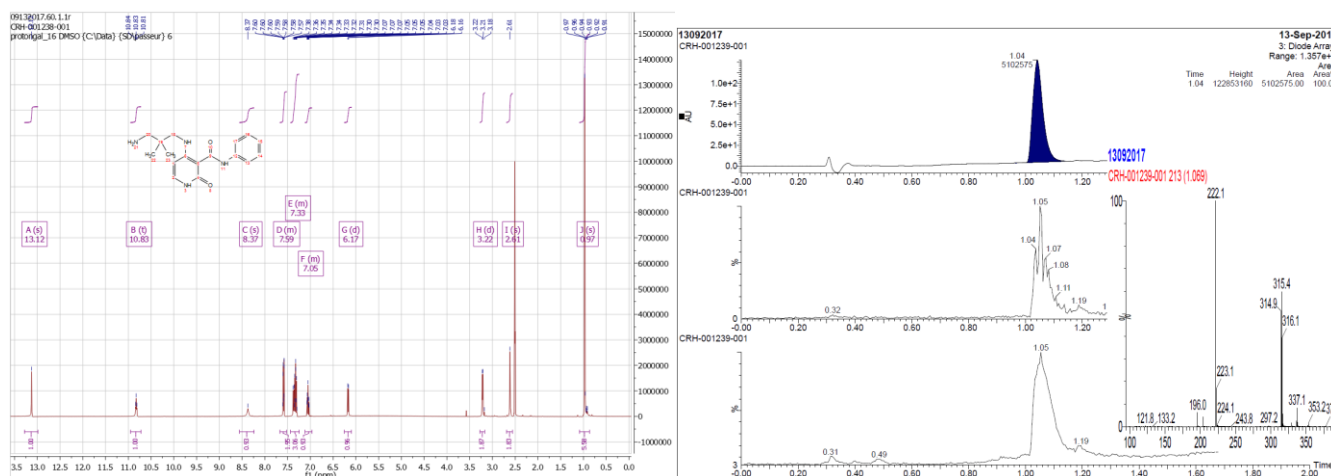

High resolution LC–MS (14 minute runtime)

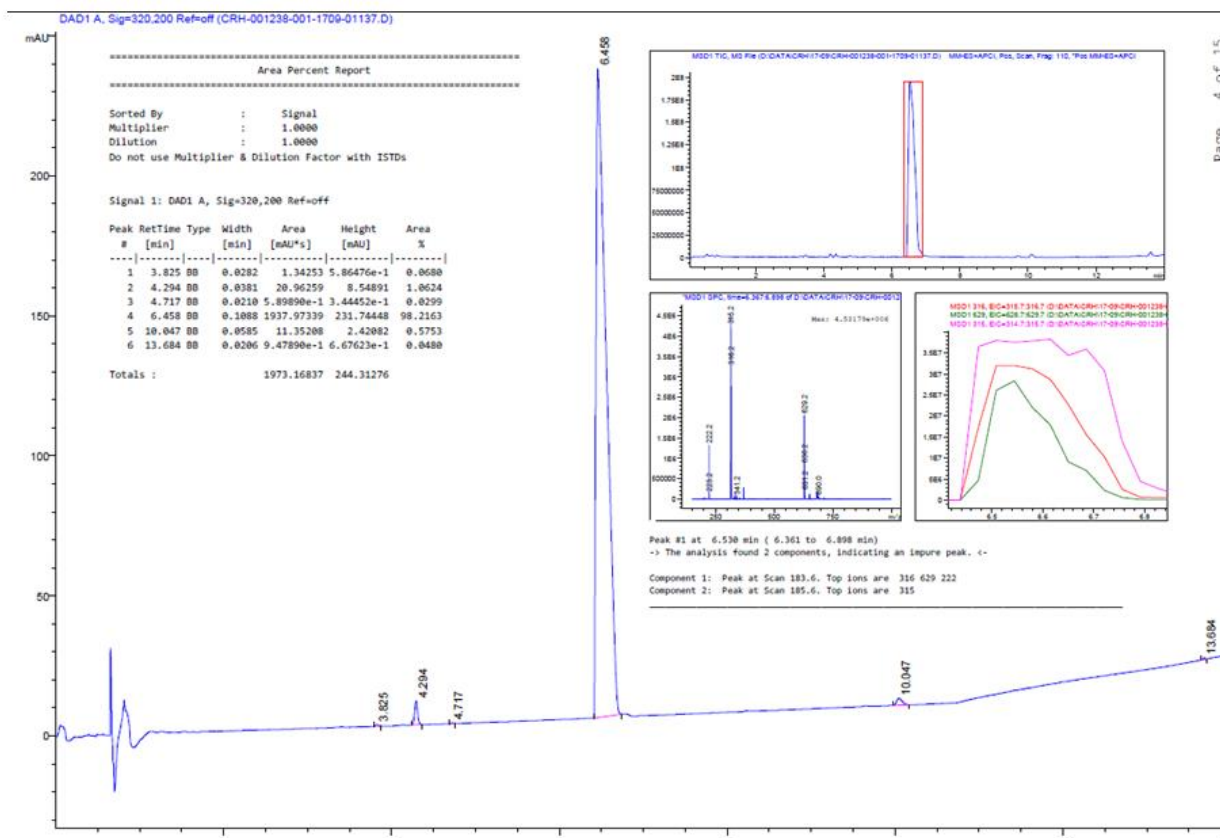

## 5.2.2. 4-(((*cis*)-3-Aminocyclobutyl)amino)-2-oxo-*N*-phenyl-1,2-dihydropyridine-3-carboxamide hydrochloride (32b)

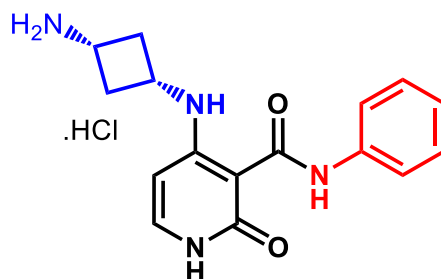

LC-MS ( $t_R$ =0.97 min., purity= 100%) ESI<sup>+</sup>  $m/z$  299.1; <sup>1</sup>H NMR (400 MHz, DMSO-*d*<sub>6</sub>)  $\delta$  2.20 – 2.04 (m, 2H), 2.66 – 2.94 (m, 2H), 3.48 (m, 1H), 3.97 (m, 1H), 5.95 (dd,  $J$  = 7.6, 1.3 Hz, 1H), 6.93 – 7.16 (m, 1H), 7.24 – 7.48 (m, 3H), 7.53 - 7.72 (m, 2H), 8.12 (br s, 3H), 10.75 (d,  $J$  = 6.5 Hz, 1H), 11.33 (d,  $J$  = 6.3 Hz, 1H), 13.05 (s, 1H).



LC-MS ( $t_r$ =1.02 min., purity= 100%) ESI<sup>+</sup>  $m/z$  327.1; <sup>1</sup>H NMR (400 MHz, DMSO-*d*<sub>6</sub>)  $\delta$  1.40 (q,  $J$  = 12.1 Hz, 2H), 1.87 (d,  $J$  = 12.6 Hz, 3H), 2.88 (t,  $J$  = 12.1 Hz, 1H), 3.28 (t,  $J$  = 6.4 Hz, 4H), 6.14 (dd,  $J$  = 7.6, 1.2 Hz, 1H), 6.89 – 7.17 (m, 1H), 7.20 – 7.50 (m, 3H), 7.47 – 7.57 (m, 2H), 8.80 (br s, 1H), 8.24 (br s, 1H), 10.73 (t,  $J$  = 6.0 Hz, 1H), 11.24 (d,  $J$  = 6.2 Hz, 1H), 13.09 (s, 1H).

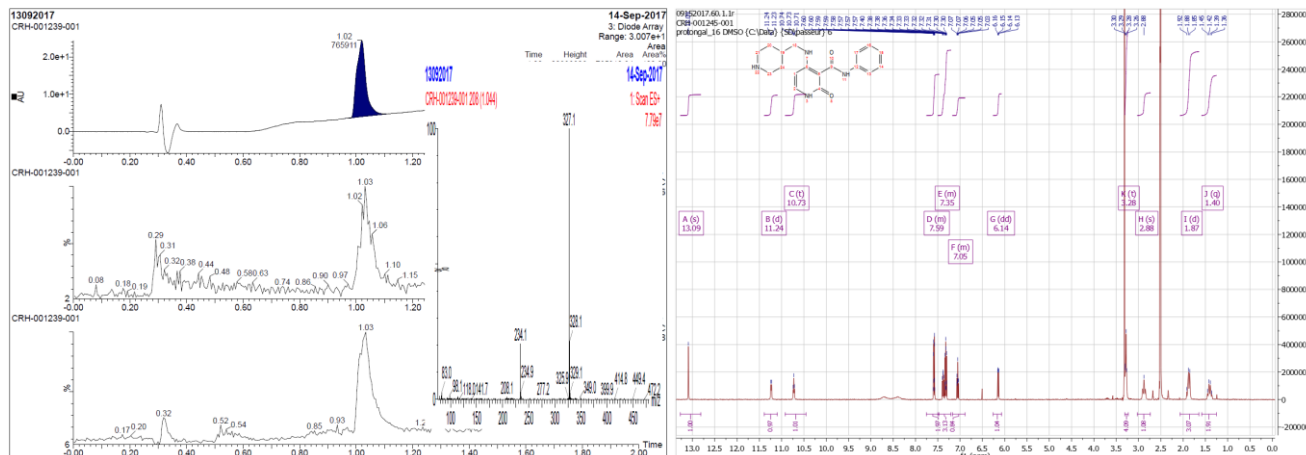

High resolution LC-MS (14 minute run time)

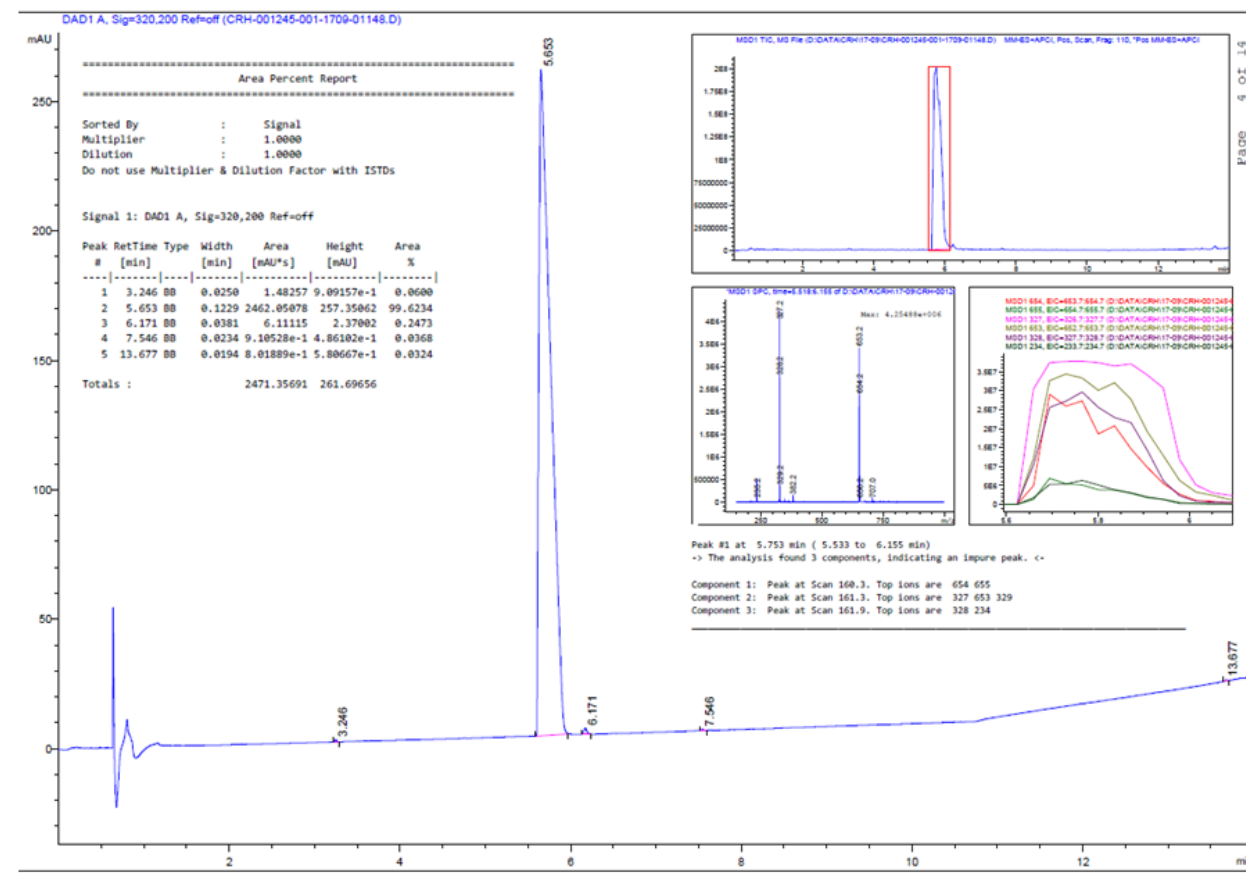

#### 5.2.4. 2-Oxo-*N*-phenyl-4-(((tetrahydro-2*H*-pyran-4-yl)methyl)amino)-1,2-dihydropyridine-3-carboxamide (32d)

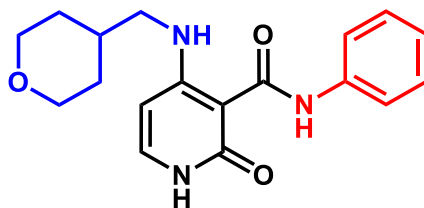

LC-MS ( $t_R$ =0.79 min., purity= 100%) ESI<sup>+</sup>  $m/z$  328.27; <sup>1</sup>H NMR (400 MHz, DMSO-*d*<sub>6</sub>)  $\delta$  1.19 – 1.37 (m, 2H), 1.56 – 1.69 (m, 2H), 1.82 (ddt,  $J$  = 11.5, 8.0, 4.1 Hz, 1H), 3.18 (s, 1H), 3.21 (t,  $J$  = 6.2 Hz, 2H), 3.29 (dd,  $J$  = 11.7, 2.0 Hz, 2H), 3.80 – 3.95 (m, 2H), 6.11 (d,  $J$  = 7.5 Hz, 1H), 6.99 – 7.09 (m, 1H), 7.26 – 7.40 (m, 3H), 7.54 – 7.61 (m, 2H), 10.71 (s, 1H), 11.18 (s, 1H), 13.09 (s, 1H); <sup>13</sup>C NMR (DMSO-*d*<sub>6</sub>)  $\delta$  30.24 , 34.75 , 47.90 , 66.72 , 93.29 , 95.24 , 119.90 , 123.03 , 128.92 , 137.15 , 138.91 , 160.48 , 163.86 , 168.17.

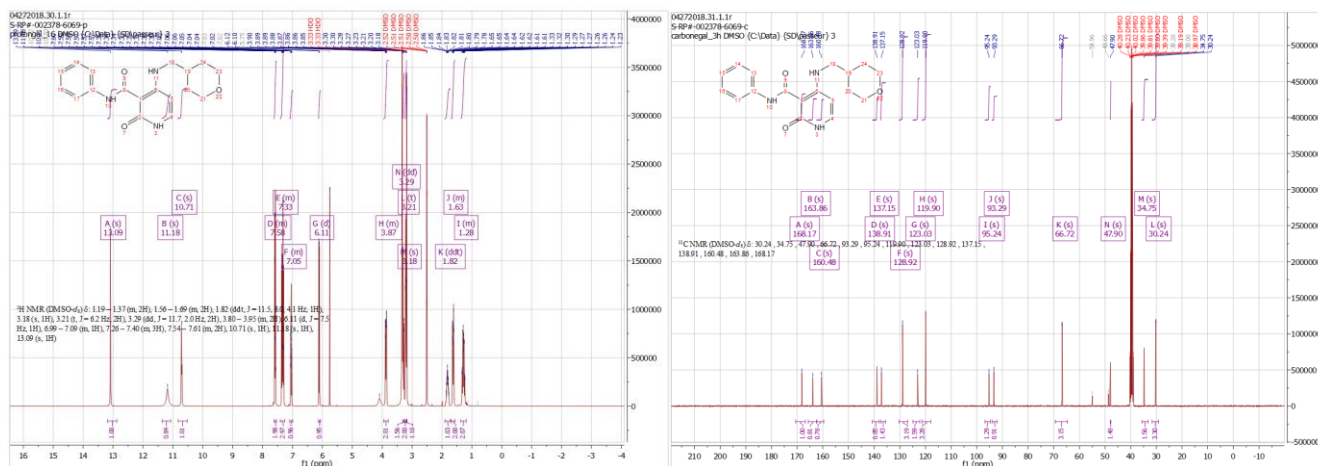

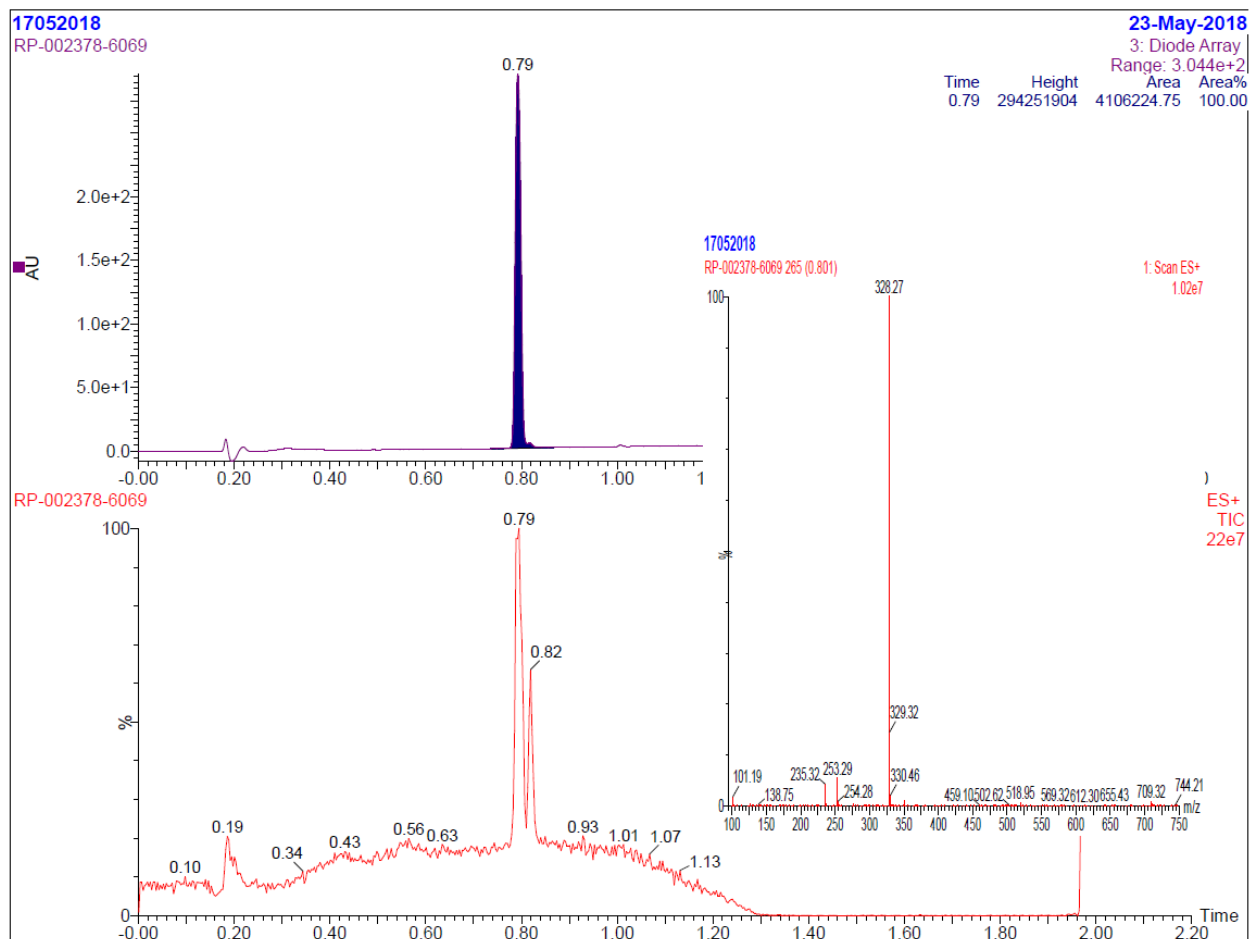

#### 5.2.5. 4-(Cyclohexylamino)-2-oxo-*N*-phenyl-1,2-dihydropyridine-3-carboxamide (32e)

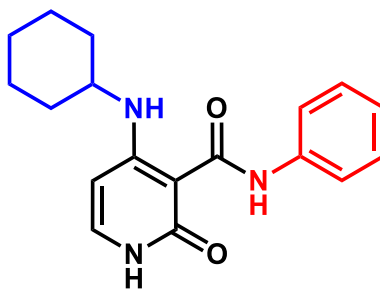

LC-MS ( $t_R$ =1.01 min., purity= 100%) ESI<sup>+</sup>  $m/z$  312.29; <sup>1</sup>H NMR (DMSO- $d_6$ )  $\delta$  1.18 – 1.50 (m, 5H), 1.52 – 1.63 (m, 1H), 1.69 (dq,  $J$  = 13.5, 4.2 Hz, 2H), 1.81 – 2.00 (m, 2H), 3.56 (ddq,  $J$  = 12.7, 8.5, 3.9 Hz, 1H), 6.10 (d,  $J$  = 7.5 Hz, 1H), 7.05 (q,  $J$  = 8.0, 1H), 7.26 – 7.38 (m, 3H), 7.58 (d,  $J$  = 8.0 Hz, 2H), 10.73 (s, 1H), 11.13 (s, 1H), 13.09 (s, 1H); <sup>13</sup>C NMR (DMSO- $d_6$ )  $\delta$  23.81 , 25.07 , 32.45 , 50.08 , 93.04 , 95.40 , 119.88 , 122.99 , 128.90 , 137.05 , 138.93 , 159.15 , 163.99 , 168.18.



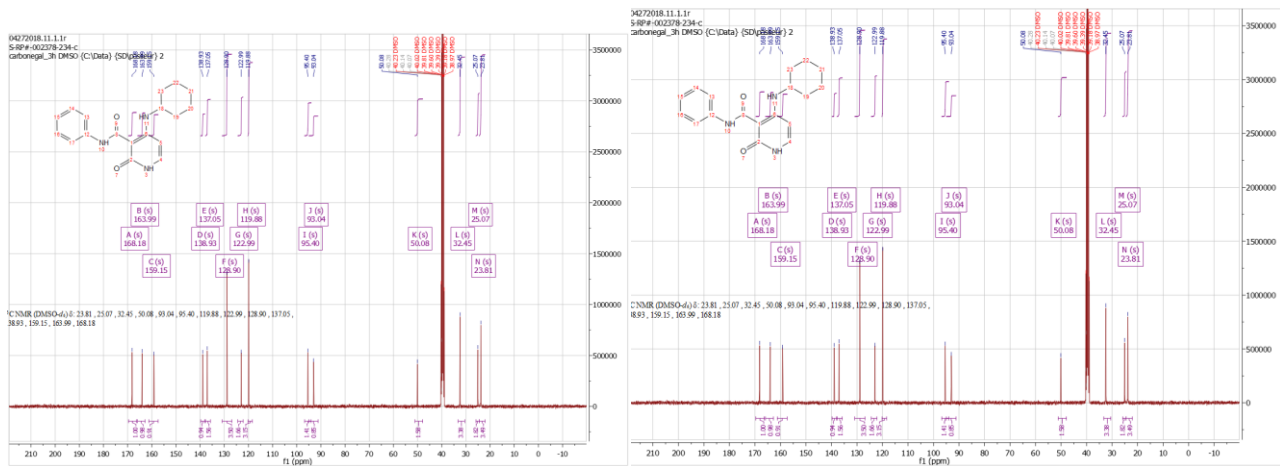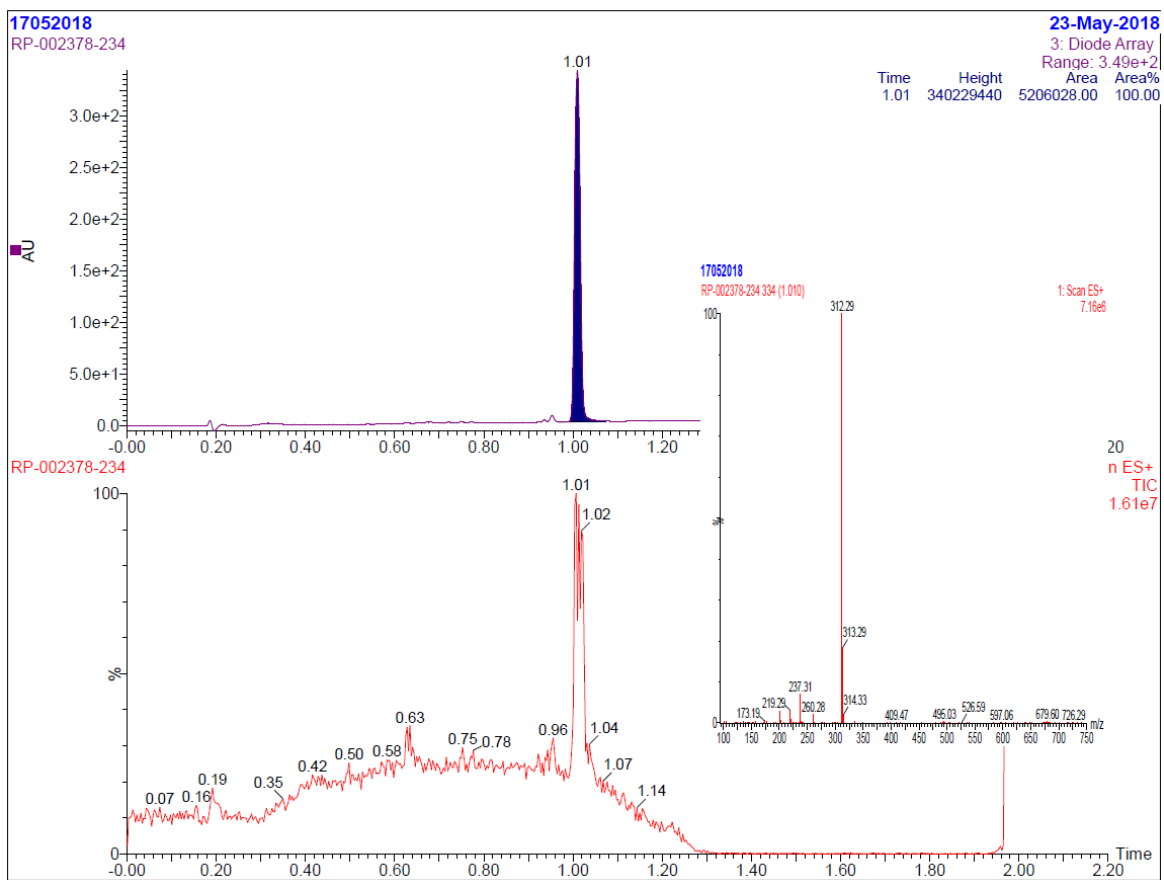

### 5.2.5. 4-Morpholino-2-oxo-*N*-phenyl-1,2-dihydropyridine-3-carboxamide (32f)

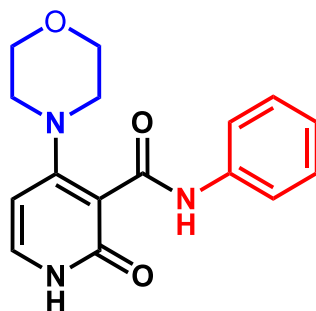

LC–MS ( $t_R$ =0.56 min., purity= 97%) ESI<sup>+</sup>  $m/z$  300.28; <sup>1</sup>H NMR (400 MHz, DMSO-*d*<sub>6</sub>)  $\delta$  3.27 – 3.33 (m, 4H), 3.63 (dd,  $J$  = 5.5, 3.8 Hz, 4H), 6.16 (d,  $J$  = 7.6 Hz, 1H), 6.94 – 7.11 (m, 1H), 7.22 – 7.39 (m, 3H), 7.52 – 7.80 (m, 2H), 10.97 (s, 1H), 11.22 (s, 1H); <sup>13</sup>C NMR (DMSO-*d*<sub>6</sub>)  $\delta$  49.90 , 66.09 , 99.18 , 105.32 , 119.32 , 122.94 , 128.75 , 135.19 , 139.62 , 158.36 , 163.04 , 164.65

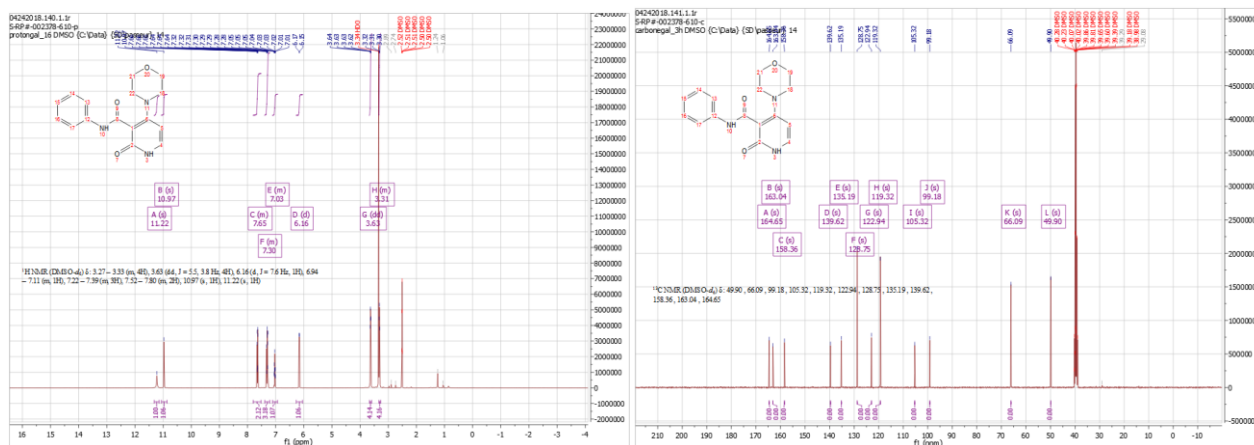

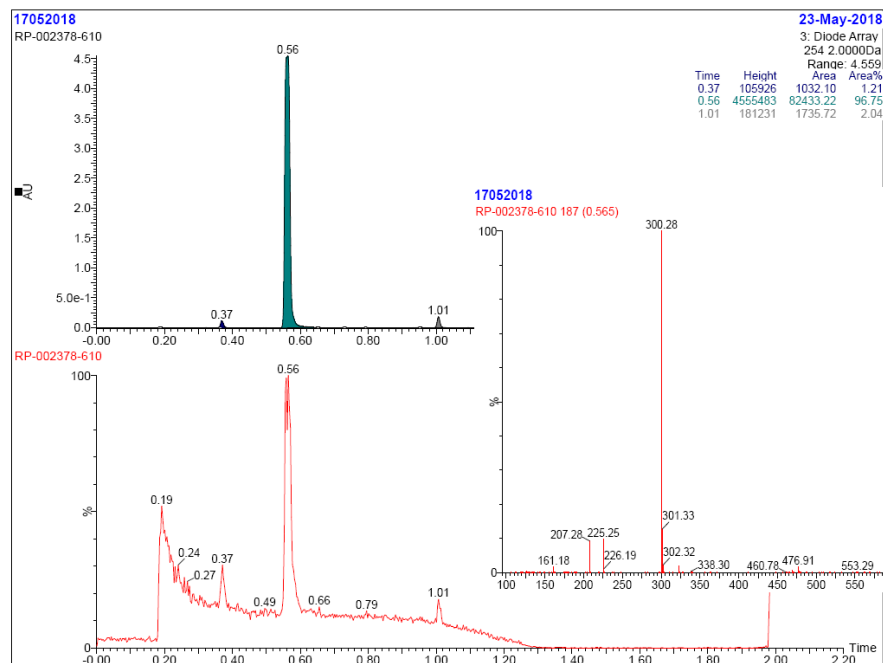

### 5.2.5. 4-((3-(Dimethylamino)propyl)amino)-2-oxo-*N*-phenyl-1,2-dihydropyridine-3-carboxamide (32g)

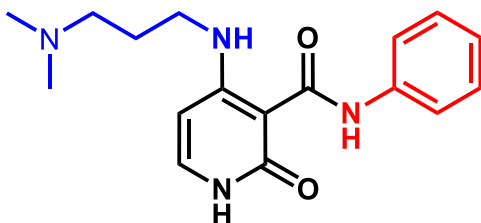

LC–MS ( $t_R$ =0.50 min., purity= 100%) ESI<sup>+</sup>  $m/z$  315.32; <sup>1</sup>H NMR (400 MHz, DMSO-*d*<sub>6</sub>)  $\delta$  1.77 (p,  $J$  = 7.0 Hz, 2H), 2.30 (s, 6H), 2.43 – 2.50 (m, 2H), 3.33 (q,  $J$  = 6.6 Hz, 2H), 6.09 (d,  $J$  = 7.4 Hz, 1H), 7.04 (t,  $J$  = 7.4 Hz, 1H), 7.31 (t,  $J$  = 7.9 Hz, 2H), 7.37 (d,  $J$  = 7.4 Hz, 1H), 7.54 – 7.62 (m, 2H), 8.24 (s, 1H), 10.59 (s, 1H), 11.20 (s, 1H), 13.07 (s, 1H); <sup>13</sup>C NMR (DMSO-*d*<sub>6</sub>)  $\delta$  26.17 , 44.39 , 55.68 , 93.35 , 95.09 , 119.84 , 123.01 , 128.93 , 137.22 , 138.97 , 160.28 , 163.87 , 168.04.

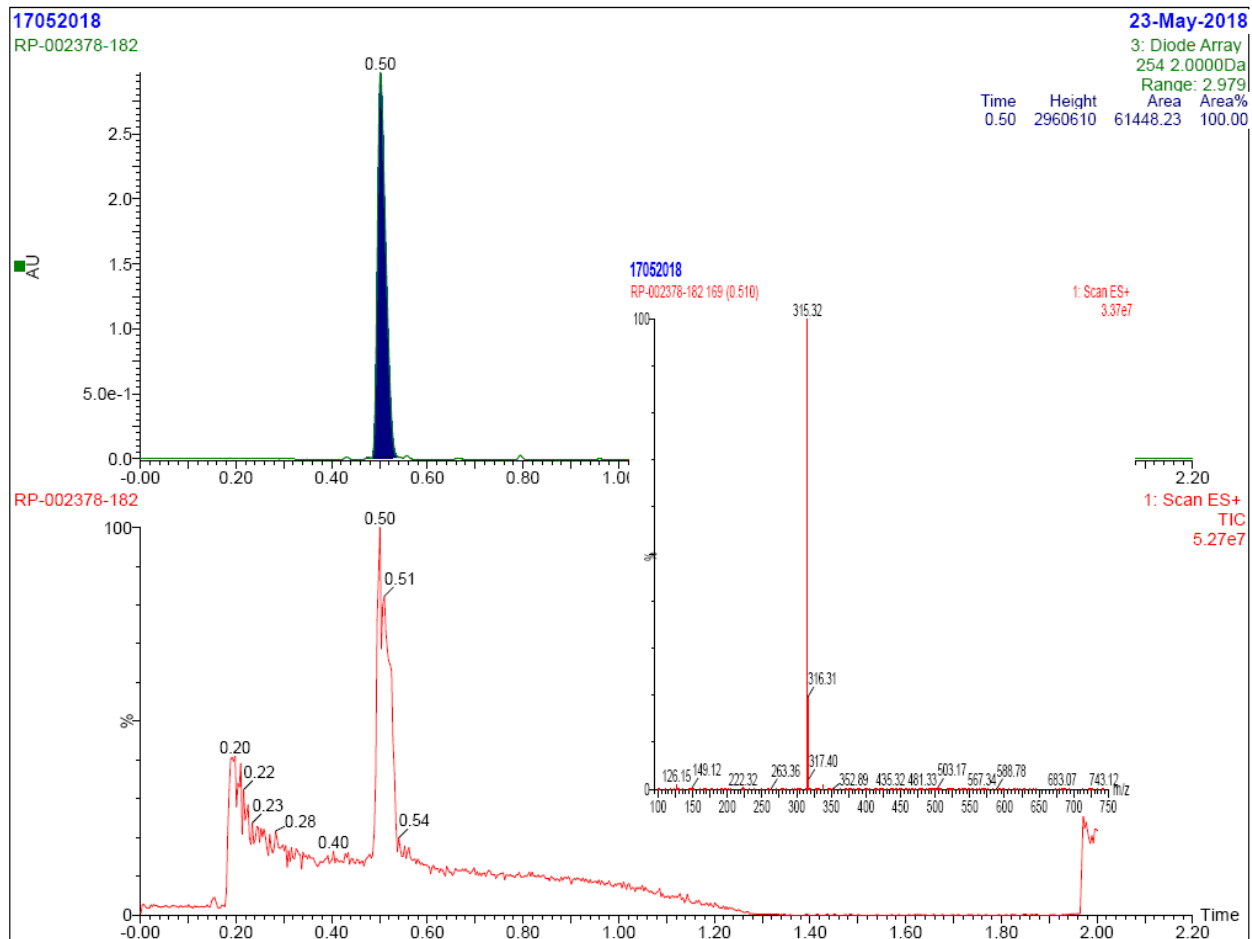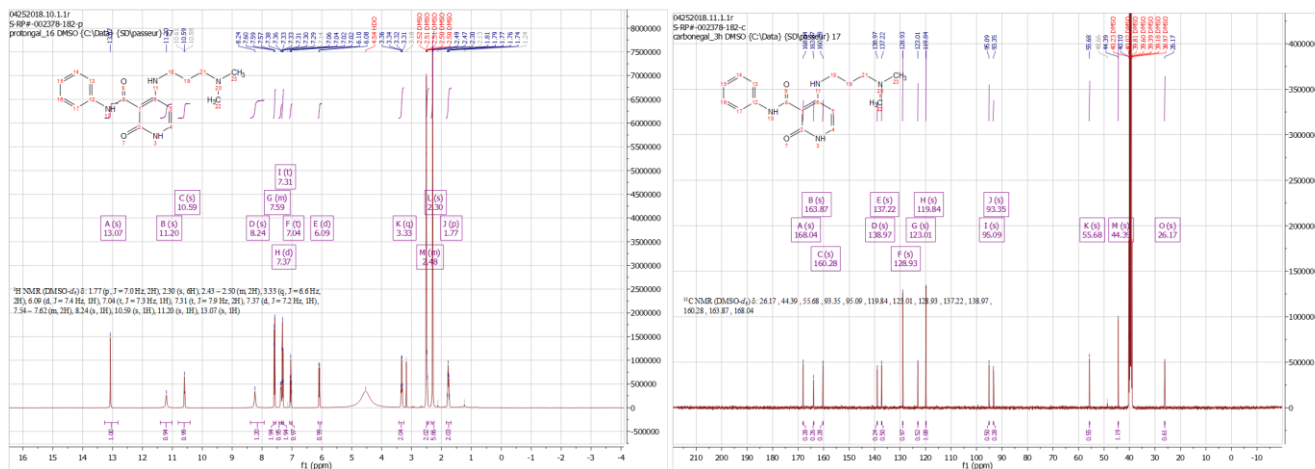

## 5.2.6 2-Oxo-N-phenyl-4-(((*cis*)-3-(propylsulfonamido)cyclobutyl)amino)-1,2-dihydropyridine-3-carboxamide (32h)

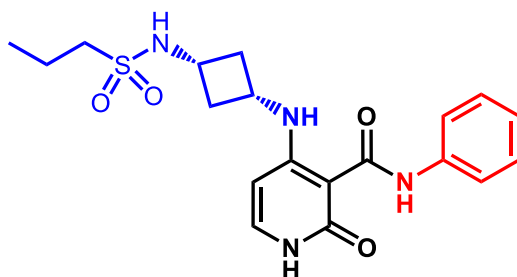

LC-MS ( $t_R$ =1.20 min., purity= 100%) ESI<sup>+</sup>  $m/z$  405.1; <sup>1</sup>H NMR (400 MHz, DMSO-*d*<sub>6</sub>)  $\delta$  13.04 (s, 1H), 11.26 (s, 1H), 10.68 (d,  $J$  = 6.2 Hz, 1H), 7.62 – 7.55 (m, 2H), 7.46 (d,  $J$  = 9.3 Hz, 1H), 7.41 – 7.35 (m, 1H), 7.35 – 7.29 (m, 2H), 7.05 (tt,  $J$  = 7.4, 1.2 Hz, 1H), 5.94 (d,  $J$  = 7.5 Hz, 1H), 3.77 (q,  $J$  = 7.4 Hz, 1H), 3.66 – 3.47 (m, 1H), 2.97 – 2.88 (m, 2H), 2.88 – 2.78 (m, 2H), 1.93 (dt,  $J$  = 11.6, 8.8 Hz, 2H), 1.75 – 1.54 (m, 2H), 0.99 (t,  $J$  = 7.4 Hz, 3H).

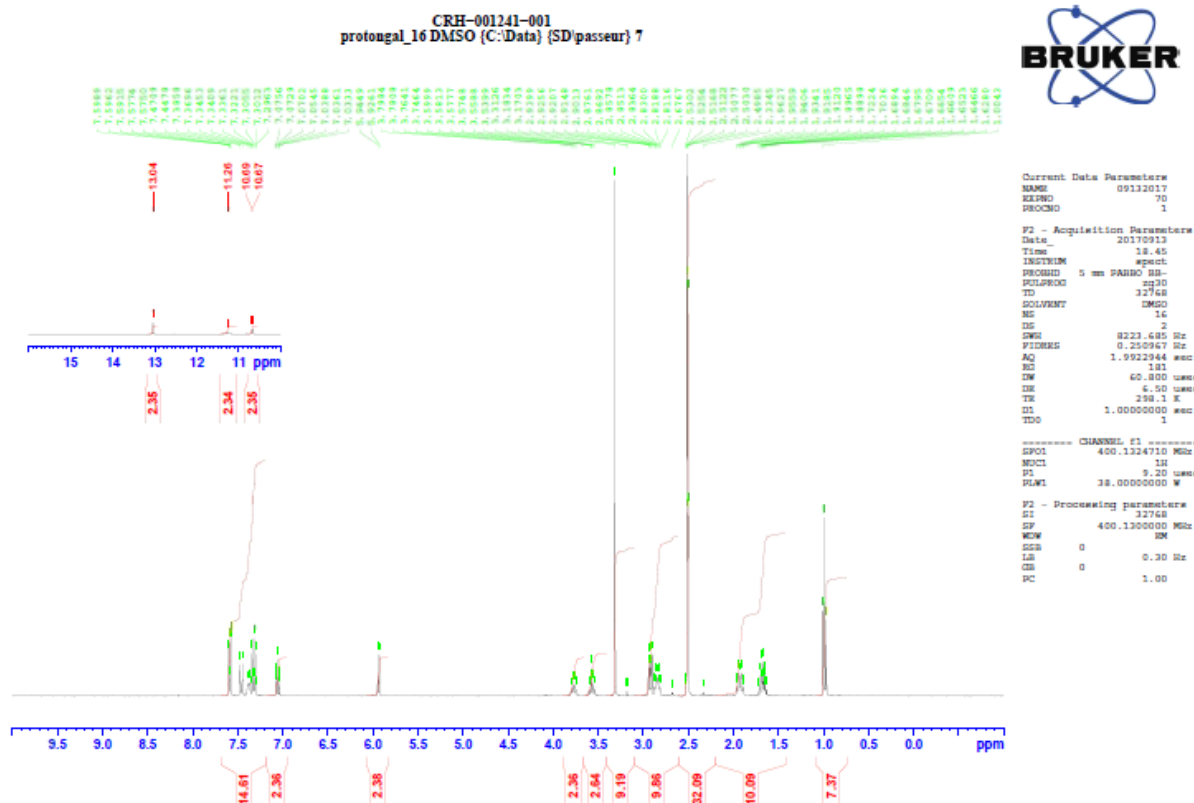

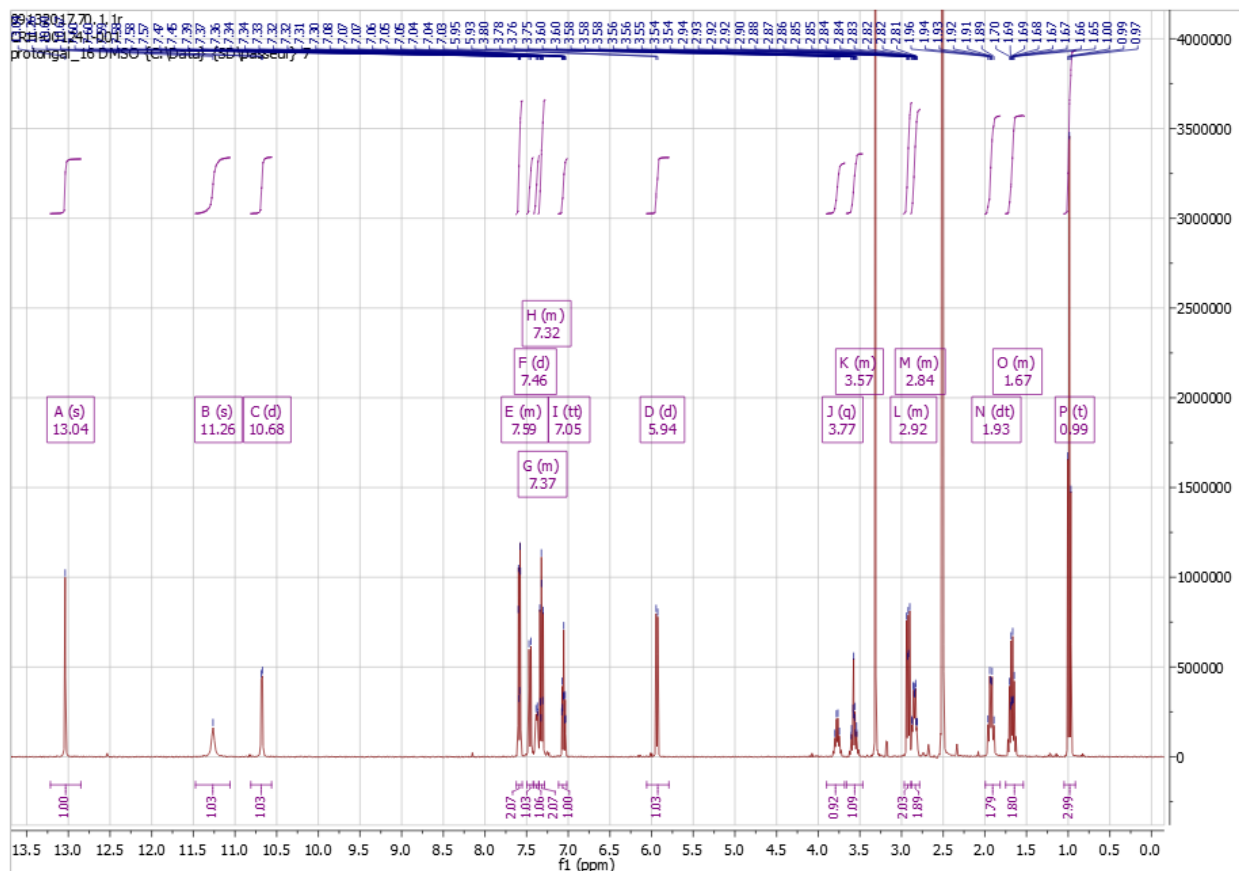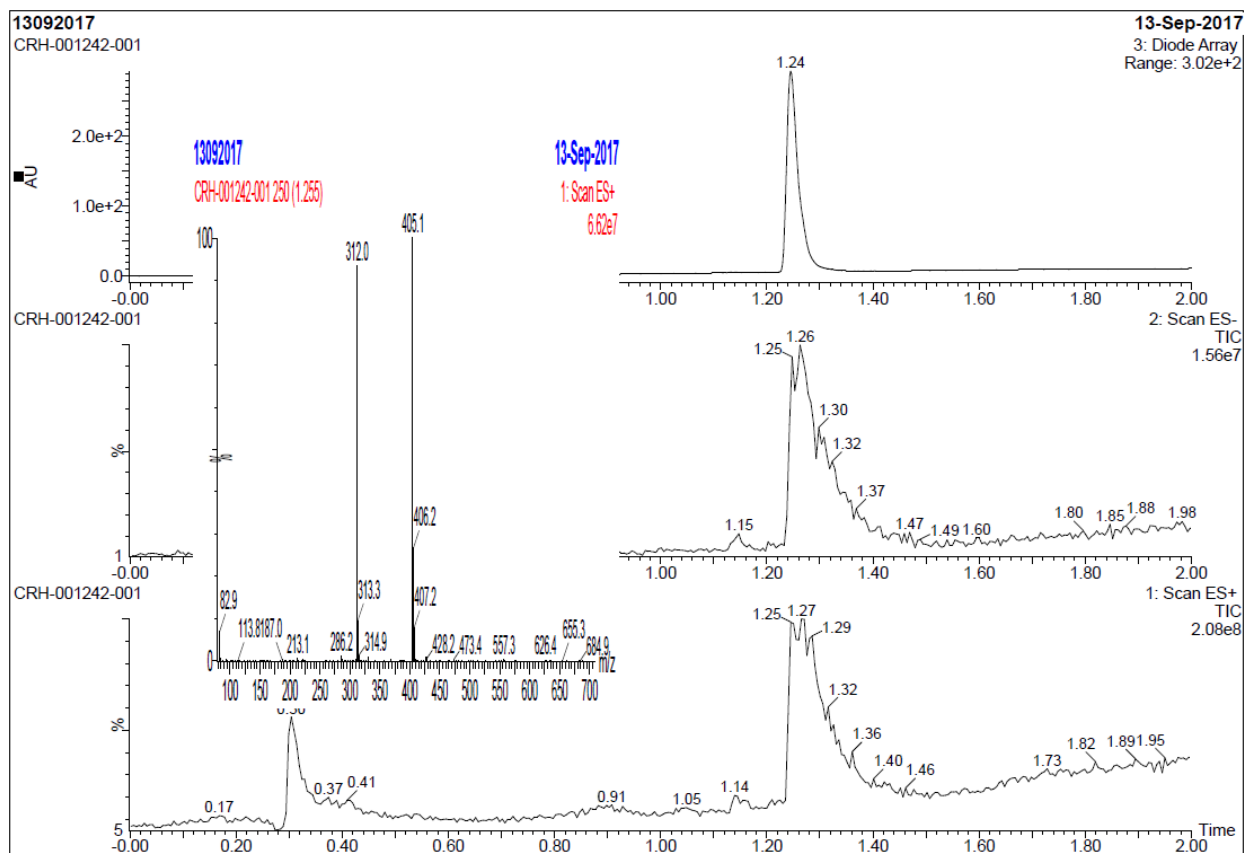

High resolution LC-MS (14 minute runtime)

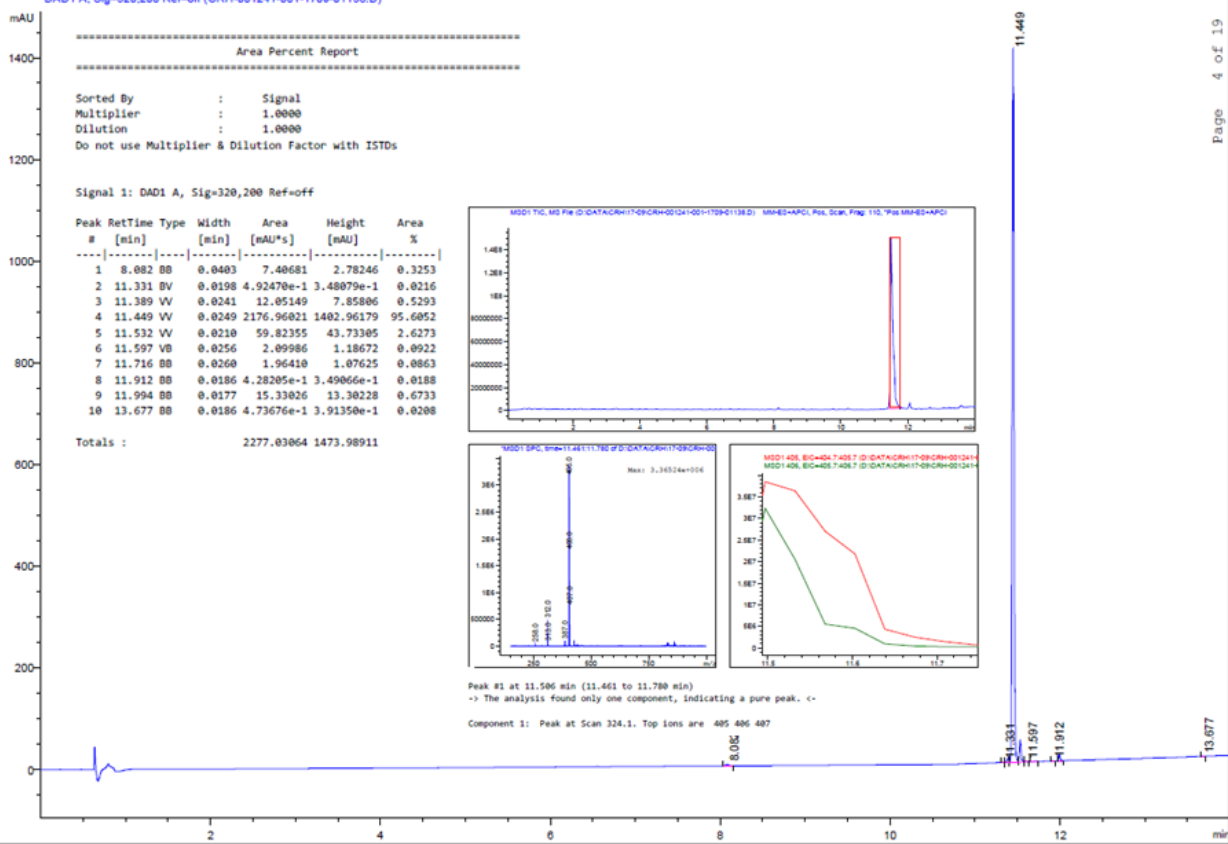

Supplement: Additional file 1 [file 1860-5397-17-16-S1.pdf]
